# Supplementary material for: Diboron as a reductant for nickel-catalyzed reductive coupling: rational design and mechanistic studies
Source: Royal Society of Chemistry journal article supplement (doi:10.1039/c4cc08703h), 2014-12-11
Supplement: c4cc08703h1.pdf [file c4cc08703h1.pdf]

Supporting Information for:

**Diboron as Reductant for Nickel-Catalyzed Reductive Coupling:  
Rational Design and Mechanistic Studies**

Guoying Zhang, Yinjun Xie, Zhengkun Wang, Yang Liu, and Hanmin Huang\*

State Key Laboratory for Oxo Synthesis and Selective Oxidation, Lanzhou Institute of  
Chemical Physics, Chinese Academy of Sciences, Lanzhou 730000, P. R. China.

E-mail: [hmhuang@licp.cas.cn](mailto:hmhuang@licp.cas.cn)

**CONTENTS**

- 1 General experimental details and materials**
- 2 Optimization of the reaction conditions**
- 3 General procedure for the tetramerization**
- 4 Experimental characterization data for products**
- 5 Mechanistic studies**
- 6 Kinetic experiments**
- 7 TON experiment**
- 8 Copies for  $^1\text{H}$  NMR and  $^{13}\text{C}$  NMR of the products**
- 9 Copies for *In situ* IR spectra**

## 1. General experiment details and materials

**Experimental:** All non-aqueous reactions and manipulations were using standard Schlenk techniques. All solvents before use were dried and degassed by standard methods and stored under nitrogen atmosphere. All reactions were monitored by TLC with silica gel-coated plates. NMR spectra were recorded on BRUKER Avance III 400 MHz spectrometers. Chemical shifts were reported in parts per million (ppm) down field from TMS with the solvent resonance as the internal standard. Coupling constants (J) were reported in Hz and referred to apparent peak multiplications. All the high-resolution mass spectrometry (HRMS) experiments were carried out using Bruker MicroTOF-QII mass instrument (ESI) or Agilent 6210 TOF mass spectrometer (APCI). IR spectra were recorded on a METTLER TOLEDO ReactIR 15 spectrometer. 1,2-Diphenylethyne were purchased from Alfa aesar. The other alkynes used here are known compounds and synthesized according to the reported methods.<sup>1</sup>

## 2. Optimization of the reaction conditions

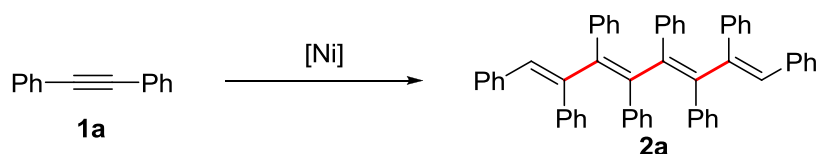

1,2-Diphenylethyne **1a** (178.2 mg, 1.0 mmol), [Ni] (0.05 mmol, 5 mol %), additives and solvents (1.0 mL) were added to a 25 mL flame-dried Young-type tube. The mixture was degassed by the freeze-thaw method and supplied with 1 atm of nitrogen, and then stirred at 120 °C for 18 hours. After cooling to room temperature, the solvents was evaporated under reduced pressure, and the residue was directly loaded onto a silica gel column (petroleum ether/ethyl acetate = 100/1) to afford the desired product **2a** as a yellow solid.

**Table S1.** Optimization of the reaction conditions <sup>a</sup>

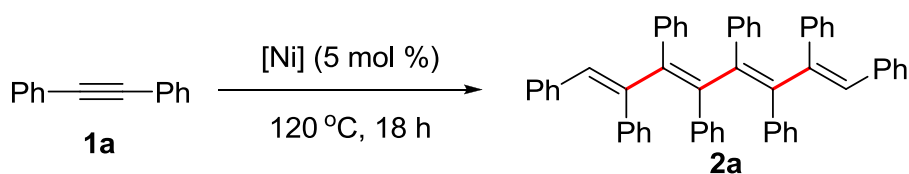

| Entry     | [Ni] (5 mol %)                                       | Additive (equiv.)                         | Solvent     | Yield (%)       |
|-----------|------------------------------------------------------|-------------------------------------------|-------------|-----------------|
| 1         | NiCl <sub>2</sub>                                    | B <sub>2</sub> pin <sub>2</sub> (1.0)     | MeOH        | <5              |
| 2         | NiCl <sub>2</sub> (PPh <sub>3</sub> ) <sub>2</sub>   | B <sub>2</sub> pin <sub>2</sub> (1.0)     | MeOH        | 87              |
| 3         | NiBr <sub>2</sub> (PPh <sub>3</sub> ) <sub>2</sub>   | B <sub>2</sub> pin <sub>2</sub> (1.0)     | MeOH        | 69              |
| 4         | NiI <sub>2</sub> (PPh <sub>3</sub> ) <sub>2</sub>    | B <sub>2</sub> pin <sub>2</sub> (1.0)     | MeOH        | 35              |
| 5         | NiCl <sub>2</sub> (dppe)                             | B <sub>2</sub> pin <sub>2</sub> (1.0)     | MeOH        | 37              |
| 6         | Ni(COD) <sub>2</sub>                                 | B <sub>2</sub> pin <sub>2</sub> (1.0)     | MeOH        | 79 <sup>b</sup> |
| 7         | NiCl <sub>2</sub> (PPh <sub>3</sub> ) <sub>2</sub>   | BF <sub>3</sub> ·Et <sub>2</sub> O (1.0)  | MeOH        | 0               |
| 8         | NiCl <sub>2</sub> (PPh <sub>3</sub> ) <sub>2</sub>   | B(OEt) <sub>3</sub> (1.0)                 | MeOH        | 0               |
| 9         | NiCl <sub>2</sub> (PPh <sub>3</sub> ) <sub>2</sub>   | BEt <sub>3</sub> (1.0)                    | MeOH        | 0               |
| 10        | NiCl <sub>2</sub> (PPh <sub>3</sub> ) <sub>2</sub>   | HBpin (1.0)                               | MeOH        | <5              |
| 11        | NiCl <sub>2</sub> (PPh <sub>3</sub> ) <sub>2</sub>   | HSiEt <sub>3</sub> (1.0)                  | MeOH        | <5              |
| 12        | NiCl <sub>2</sub> (PPh <sub>3</sub> ) <sub>2</sub>   | B <sub>2</sub> pin <sub>2</sub> (0.6)     | MeOH        | 86              |
| <b>13</b> | <b>NiCl<sub>2</sub>(PPh<sub>3</sub>)<sub>2</sub></b> | <b>B<sub>2</sub>pin<sub>2</sub> (0.3)</b> | <b>MeOH</b> | <b>89</b>       |
| 14        | NiCl <sub>2</sub> (PPh <sub>3</sub> ) <sub>2</sub>   | B <sub>2</sub> pin <sub>2</sub> (0.2)     | MeOH        | 80              |
| 15        | NiCl <sub>2</sub> (PPh <sub>3</sub> ) <sub>2</sub>   | B <sub>2</sub> pin <sub>2</sub> (0.1)     | MeOH        | 23              |

|    |                                                    |                                       |                   |    |
|----|----------------------------------------------------|---------------------------------------|-------------------|----|
| 16 | NiCl <sub>2</sub> (PPh <sub>3</sub> ) <sub>2</sub> | B <sub>2</sub> pin <sub>2</sub> (0.3) | EtOH              | 76 |
| 17 | NiCl <sub>2</sub> (PPh <sub>3</sub> ) <sub>2</sub> | B <sub>2</sub> pin <sub>2</sub> (0.3) | PrOH              | 83 |
| 18 | NiCl <sub>2</sub> (PPh <sub>3</sub> ) <sub>2</sub> | B <sub>2</sub> pin <sub>2</sub> (0.3) | <i>i</i> -PrOH    | <5 |
| 19 | NiCl <sub>2</sub> (PPh <sub>3</sub> ) <sub>2</sub> | B <sub>2</sub> pin <sub>2</sub> (0.3) | MeNO <sub>2</sub> | 0  |
| 20 | NiCl <sub>2</sub> (PPh <sub>3</sub> ) <sub>2</sub> | B <sub>2</sub> pin <sub>2</sub> (0.3) | DCE               | 0  |
| 21 | --                                                 | B <sub>2</sub> pin <sub>2</sub> (0.3) | MeOH              | 0  |
| 22 | NiCl <sub>2</sub> (PPh <sub>3</sub> ) <sub>2</sub> | --                                    | MeOH              | 0  |

<sup>a</sup>General conditions: **1a** (178.2 mg, 1.0 mmol), [Ni] (0.05 mmol, 5 mol%), additive, solvent (1.0 mL), Ar, 120 °C for 18 h, isolated yield, unless otherwise noted. <sup>b</sup> Added PPh<sub>3</sub> (26.2 mg, 0.10 mmol, 10 mol%)

### 3. General procedure for the tetramerization

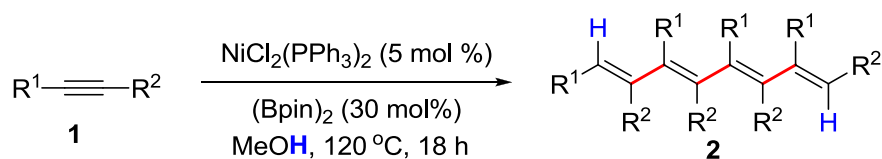

1,2-Diphenylethyne **1** (1.0 mmol), NiCl<sub>2</sub>(PPh<sub>3</sub>)<sub>2</sub> (32.7 mg, 0.05 mmol, 5 mol %), B<sub>2</sub>pin<sub>2</sub> (76.2 mg, 0.3 mmol, 30 mol %) and MeOH (1.0 mL) were added to a 25 mL flame-dried Young-type tube. The mixture was degassed by the freeze-thaw method and supplied with 1 atm of nitrogen, and then stirred at 120 °C for 18 hours. After cooling to room temperature, the solvents were evaporated under reduced pressure, and the residue was directly loaded onto a silica gel column (petroleum ether/ethyl acetate = 100/1 – 5/1) to afford the desired product **2**.

#### 4. Experimental characterization data for products

**(1E,3E,5E,7E)-1,2,3,4,5,6,7,8-Octaphenyl-1,3,5,7-octatetraene (2a):** The title

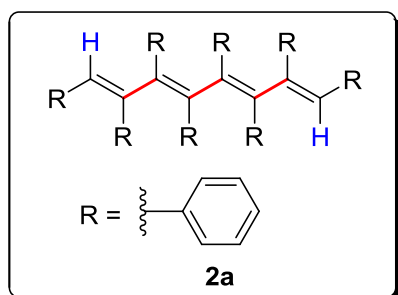

compound was prepared according to the general procedure as a yellow solid, 158.7 mg, 89% yield.  $^1\text{H}$  NMR (400 MHz,  $\text{CDCl}_3$ )  $\delta$  6.33 (s, 2H), 6.86-6.92 (m, 6H), 7.00-7.11 (m, 30H), 7.58 (d,  $J = 7.6$  Hz, 4H);  $^{13}\text{C}$  NMR (100 MHz,  $\text{CDCl}_3$ )  $\delta$  126.2, 126.5, 126.6, 126.7, 127.3, 127.4, 127.7, 127.8, 129.0, 129.7,

130.0, 130.3, 133.7, 137.8, 139.1, 141.3, 142.0, 142.5, 142.7, 145.3; HRMS (APCI) calcd. for  $\text{C}_{56}\text{H}_{43}$  [M+H]: 715.3359, found: 715.3344.

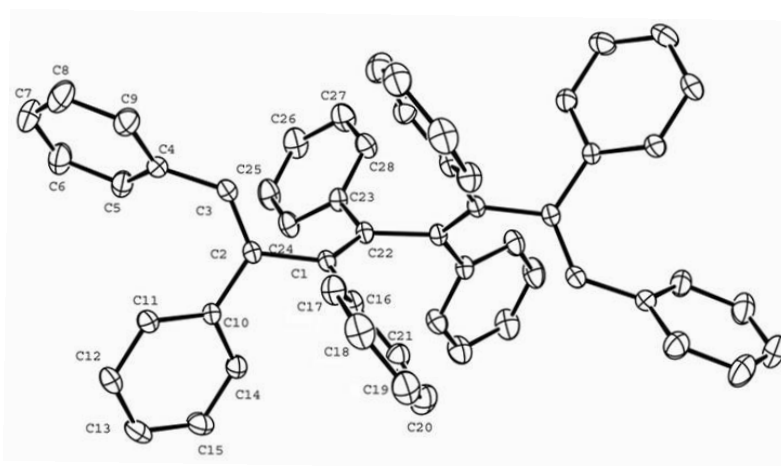

Figure S1. ORTEP drawing of product **2a**

**(1E,3E,5E,7E)-1,2,3,4,5,6,7,8-Octa(4-methylphenyl)-1,3,5,7-octatetraene (2b):** The

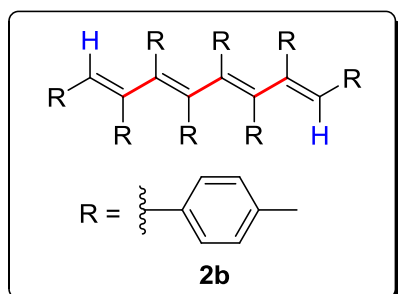

title compound was prepared according to the general procedure as a yellow solid, 169.9 mg, 82% yield.  $^1\text{H}$  NMR (400 MHz,  $\text{CDCl}_3$ )  $\delta$  2.13-2.25 (s, 24H), 6.22 (s, 2H), 6.80-6.93 (m, 24H), 7.04 (d,  $J = 7.6$  Hz, 4H), 7.58 (d,  $J = 7.6$  Hz, 4H);  $^{13}\text{C}$  NMR (100 MHz,  $\text{CDCl}_3$ )  $\delta$  21.1, 21.2, 21.3, 127.2, 127.7,

128.1, 128.4, 128.5, 128.8, 129.5, 129.9, 130.1, 131.3, 131.9, 135.4, 135.5, 135.6, 135.9, 136.1, 136.2, 138.4, 138.8, 141.4, 141.7, 144.1; HRMS (APCI) calcd. for  $\text{C}_{64}\text{H}_{59}$  [M+H]: 827.4611, found: 827.4601.

**(1E,3E,5E,7E)-1,2,3,4,5,6,7,8-Octa(3-methylphenyl)-1,3,5,7-octatetraene (2c):** The

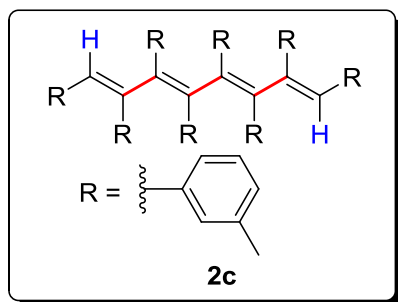

title compound was prepared according to the general procedure as a yellow solid, 140.2 mg, 68% yield.  $^1\text{H}$  NMR (400 MHz,  $\text{CDCl}_3$ )  $\delta$  2.10-2.17 (s, 24H), 6.22 (s, 2H), 6.62-6.70 (m, 6H), 6.79-7.02 (m, 22H), 7.19-7.25 (m, 4H);  $^{13}\text{C}$  NMR (100 MHz,  $\text{CDCl}_3$ )  $\delta$  21.3, 21.3, 21.6, 126.0, 126.5, 126.8, 126.9, 126.9,

127.0, 127.0, 127.1, 127.2, 127.3, 127.5, 129.9, 130.2, 131.0, 131.2, 133.1, 135.8, 136.2, 136.6, 137.1, 138.0, 139.6, 141.8, 142.6, 143.1, 143.2, 145.2; HRMS (APCI) calcd. for  $\text{C}_{64}\text{H}_{59}$  [M+H]: 827.4611, found: 827.4601

**(1E,3E,5E,7E)-1,2,3,4,5,6,7,8-Octa(3,5-dimethylphenyl)-1,3,5,7-octatetraene (2d):**

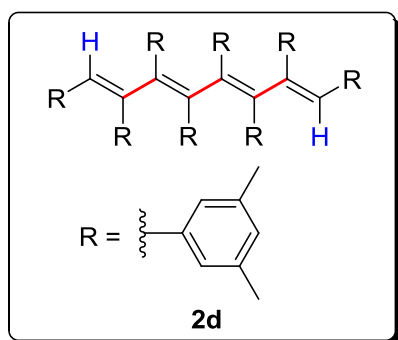

The title compound was prepared according to the general procedure as a yellow solid, 180.7 mg, 77% yield.  $^1\text{H}$  NMR (400 MHz,  $\text{CDCl}_3$ )  $\delta$  2.06 -2.07 (m, 36H), 2.15 (s, 12H), 6.08 (s, 2H), 6.41 (s, 2H), 6.48 (s, 4H), 6.55-6.63 (m, 10H), 6.68 (s, 8H);  $^{13}\text{C}$  NMR (100 MHz,  $\text{CDCl}_3$ )  $\delta$  21.0, 21.1, 21.4, 126.7, 126.9,

127.4, 127.6, 127.7, 127.8, 128.0, 128.2, 132.6, 135.1, 135.8, 136.0, 136.7, 138.1, 140.1, 143.0, 143.4, 144.2, 144.8, 146.1; HRMS (APCI) calcd. for  $\text{C}_{72}\text{H}_{75}$  [M+H]: 939.5863, found: 939.5894.

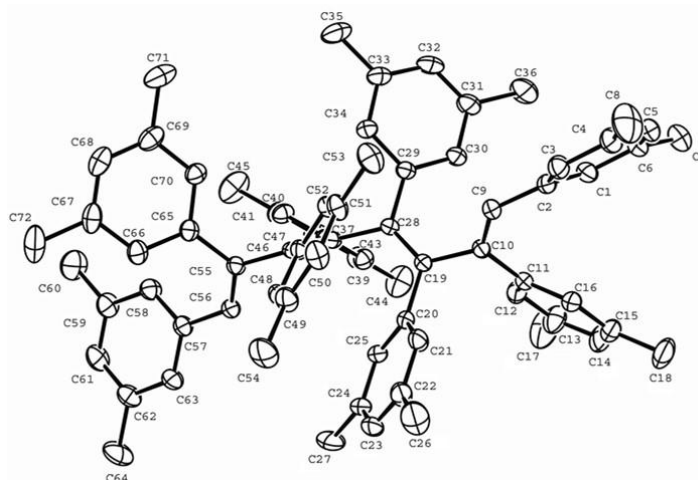

**Figure S2.** ORTEP drawing of product **2d**

**(1E,3E,5E,7E)-1,2,3,4,5,6,7,8-Octa(4-methoxyphenyl)-1,3,5,7-octatetraene (2e):**

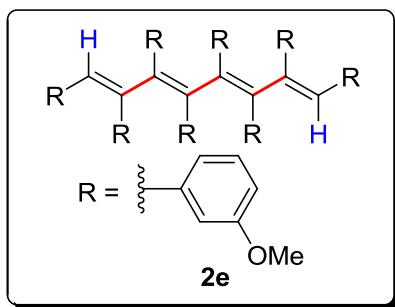

The title compound was prepared according to the general procedure as a yellow solid, 178.9 mg, 75% yield.  $^1\text{H NMR}$  (400 MHz,  $\text{CDCl}_3$ )  $\delta$  3.51-3.54 (m, 12H), 3.62-3.63 (m, 12H), 6.32 (s, 2H), 6.41 (s, 2H), 6.47-6.62 (m, 14H), 6.73 (d,  $J = 7.6$  Hz, 2H), 6.90 (d,  $J = 5.6$  Hz, 2H), 6.96-7.05 (m, 8H), 7.10 (s, 2H),

7.16 (d,  $J = 7.6$  Hz, 2H);  $^{13}\text{C NMR}$  (100 MHz,  $\text{CDCl}_3$ )  $\delta$  54.8, 54.9, 55.0, 112.1, 112.2, 112.9, 113.1, 113.8, 115.1, 115.4, 115.8, 121.7, 122.4, 122.6, 128.0, 128.2, 128.7, 128.8, 133.6, 139.1, 140.4, 142.6, 142.6, 143.5, 145.0, 158.7, 158.8, 158.8, 159.0; **HRMS** (APCI) calcd. for  $\text{C}_{64}\text{H}_{59}\text{O}_8$  [ $\text{M}+\text{H}$ ]: 955.4204, found: 955.4203.

**(1E,3E,5E,7E)-1,2,3,4,5,6,7,8-Octa(4-trifluoromethoxyphenyl)-1,3,5,7-octatetraene (2f):**

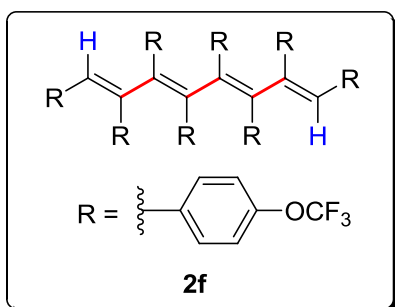

**(2f):** The title compound was prepared according to the general procedure as a yellow solid, 280.0 mg, 81% yield.  $^1\text{H NMR}$  (400 MHz,  $\text{CDCl}_3$ )  $\delta$  6.24 (s, 2H), 6.74-6.92 (m, 24H), 7.00-7.02 (m, 4H), 7.16-7.18 (m, 4H);  $^{13}\text{C NMR}$  (100 MHz,  $\text{CDCl}_3$ )  $\delta$  116.5, 116.5, 116.6, 119.0, 119.1, 119.2, 120.0,

120.4, 120.7, 121.6, 121.6, 121.7, 124.2, 124.2, 124.3, 130.2, 130.9, 131.1, 134.7, 135.0, 137.8, 141.5, 141.6, 143.1, 144.1, 147.2, 147.6, 147.6, 148.0, 148.0, 148.2, 148.2, 148.4, 148.5;  $^{19}\text{F NMR}$  (376 MHz,  $\text{CDCl}_3$ )  $\delta$  -58.2, -58.1, -58.0; **HRMS** (APCI) calcd. for  $\text{C}_{64}\text{H}_{34}\text{F}_{24}\text{O}_8$  [ $\text{M}$ ]: 1386.1876, found: 1386.1834.

**(1E,3E,5E,7E)-1,2,3,4,5,6,7,8-Octa(4-fluorophenyl)-1,3,5,7-octatetraene (2g):**

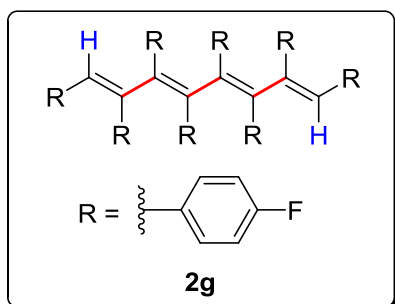

The title compound was prepared according to the general procedure as a yellow solid, 117.4 mg, 83% yield.  $^1\text{H NMR}$  (400 MHz,  $\text{CDCl}_3$ )  $\delta$  6.20 (s, 2H), 6.72-6.83 (m, 20H), 6.86-6.89 (m, 4H), 7.02-7.06 (m, 4H), 7.25-7.29 (m, 4H);  $^{13}\text{C NMR}$  (100 MHz,



CDCl<sub>3</sub>) δ 114.5, 114.8, 115.0, 115.2, 130.5, 130.6, 131.1, 131.1, 131.4, 131.5, 132.8, 132.8, 133.5, 134.7, 134.8, 137.5, 137.5, 138.0, 141.5, 142.2, 145.1, 160.0, 160.4, 160.5, 160.6, 162.4, 162.8, 163.0, 163.0; <sup>19</sup>F NMR (376 MHz, CDCl<sub>3</sub>) δ -114.8, -114.2, -114.0, -114.0; HRMS (APCI) calcd. for C<sub>56</sub>H<sub>34</sub>F<sub>8</sub> [M]: 858.2538, found: 858.2529.

**(1E,3E,5E,7E)-1,2,3,4,5,6,7,8-Octa(4-chlorophenyl)-1,3,5,7-octatetraene (2h):** The

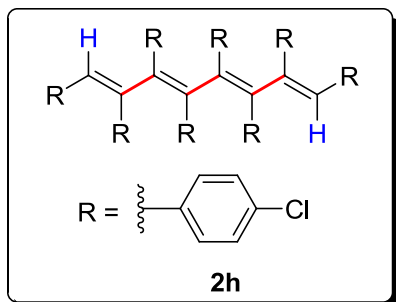

title compound was prepared according to the general procedure as a yellow solid, 157.8 mg, 64% yield. <sup>1</sup>H NMR (400 MHz, CDCl<sub>3</sub>) δ 6.18 (s, 2H), 6.73 (d, *J* = 8.4 Hz, 4H), 6.83 (d, *J* = 8.4 Hz, 4H), 6.95 (d, *J* = 8.4 Hz, 4H), 7.02-7.10 (m, 16H), 7.23-7.25 (d, *J* = 8.4 Hz, 4H); <sup>13</sup>C NMR (100 MHz,

CDCl<sub>3</sub>) δ 128.0, 128.0, 128.4, 128.5, 130.2, 130.7, 130.8, 131.1, 132.7, 133.3, 134.0, 134.9, 136.8, 139.4, 139.9, 141.6, 142.2, 145.3; HRMS (APCI) calcd. for C<sub>56</sub>H<sub>35</sub>Cl<sub>8</sub> [M+H]: 987.0247, found: 987.0245.

**(1E,3E,5E,7E)-1,2,3,4,5,6,7,8-Octa(3-chlorophenyl)-1,3,5,7-octatetraene (2i):** The

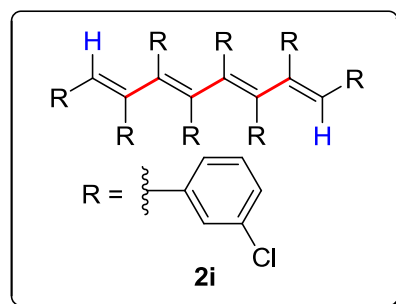

title compound was prepared according to the general procedure as a yellow solid, 197.1 mg, 80% yield. <sup>1</sup>H NMR (400 MHz, CDCl<sub>3</sub>) δ 6.27 (s, 2H), 6.68 (d, *J* = 7.6 Hz, 2H), 6.77 (d, *J* = 7.2 Hz, 2H), 6.88-7.14 (m, 30H); <sup>13</sup>C NMR (100 MHz, CDCl<sub>3</sub>) δ 126.9, 127.1, 127.4, 127.5, 127.7, 128.0, 128.9,

129.1, 129.2, 129.3, 129.4, 129.8, 129.9, 133.5, 133.8, 134.0, 134.0, 134.8, 138.1, 140.3, 142.3, 143.0, 143.2, 143.5, 146.0; HRMS (APCI) calcd. for C<sub>56</sub>H<sub>35</sub>Cl<sub>8</sub> [M+H]: 987.0247, found: 987.0251.

**(1E,3E,5E,7E)-1,2,3,4,5,6,7,8-Octa(4-bromophenyl)-1,3,5,7-octatetraene (2j):** The

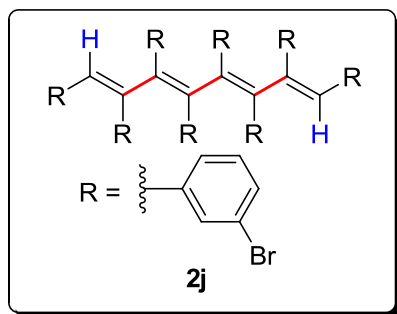

title compound was prepared according to the general procedure as a yellow solid, 151.2 mg, 45% yield.  $^1\text{H NMR}$  (400 MHz,  $\text{CDCl}_3$ )  $\delta$  6.24 (s, 2H), 6.70 (d,  $J = 8.0$  Hz, 2H), 6.78 (d,  $J = 7.6$  Hz, 2H), 6.86-7.11 (m, 21H), 7.18-7.20 (m, 4H), 7.25 (s, 1H), 7.28 (d,  $J = 8.0$  Hz, 2H);  $^{13}\text{C NMR}$  (100 MHz,

$\text{CDCl}_3$ )  $\delta$  121.7, 122.1, 122.1, 127.5, 127.7, 128.2, 128.4, 129.0, 129.4, 129.6, 129.6, 129.7, 130.3, 130.4, 130.6, 132.1, 132.3, 132.6, 133.0, 134.8, 138.3, 140.7, 142.6, 143.7, 143.8, 144.0, 146.4; **HRMS** (APCI) calcd. for  $\text{C}_{56}\text{H}_{35}\text{Br}_8$   $[\text{M}+\text{H}]$ : 1338.62, found: 1338.6155.

**1,2,3,4,5,6,7,8-Octa(4-bromophenyl)-1,3,5,7-octatetraene (2k):** The title compound

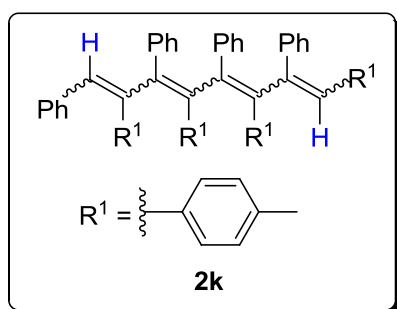

was prepared according to the general procedure as a yellow solid, 163.2 mg, 85% yield.  $^1\text{H NMR}$  (400 MHz,  $\text{CDCl}_3$ )  $\delta$  2.12-2.25 (m, 12H), 6.25-6.32 (m, 2H), 6.75-6.96 (m, 14H), 6.70-7.11 (m, 18H), 7.55-7.65 (m, 4H);  $^{13}\text{C NMR}$  (100 MHz,  $\text{CDCl}_3$ )  $\delta$  21.2, 126.3, 126.5, 127.1, 127.1, 127.4, 127.6, 127.7,

127.8, 128.2, 128.5, 128.5, 128.9, 129.0, 129.0, 129.6, 129.9, 129.9, 130.0, 130.2, 130.3, 132.2, 132.9, 135.8, 135.9, 136.2, 136.3, 138.2, 138.3, 138.6, 138.6, 139.4, 141.9, 142.3, 144.2; **HRMS** (APCI) calcd. for  $\text{C}_{60}\text{H}_{51}$   $[\text{M}+\text{H}]$ : 771.3985, found: 771.3993.

## 5. Mechanistic studies

### 5.1 D-Labelled experiments

#### 5.1.1 Tetramerization in CH<sub>3</sub>OH with D<sub>2</sub>O as additive

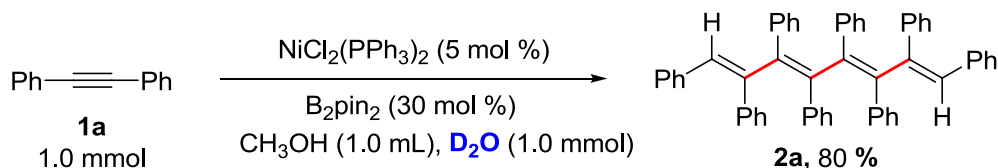

1,2-Diphenylethyne **1a** (178.2 mg, 1.0 mmol), NiCl<sub>2</sub>(PPh<sub>3</sub>)<sub>2</sub> (32.7 mg, 0.05 mmol, 5 mol%), B<sub>2</sub>pin<sub>2</sub> (76.2 mg, 0.3 mmol, 30 mol%), CH<sub>3</sub>OH (1.0 mL) and D<sub>2</sub>O (20.0 mg, 1.0 mmol) were added to a 25 mL flame-dried Young-type tube. The mixture was degassed by the freeze-thaw method and supplied with 1 atm of nitrogen, and then stirred at 120 °C for 18 hours. After cooling to room temperature, the solvent was evaporated under reduced pressure, and the residue was directly loaded onto a silica gel column (petroleum ether/ethyl acetate = 100/1) to afford the desired product **2a** as a yellow solid (142.6 mg, 80 %). The product was characterized by NMR and HRMS (APCI) (Figure S3 and S4).

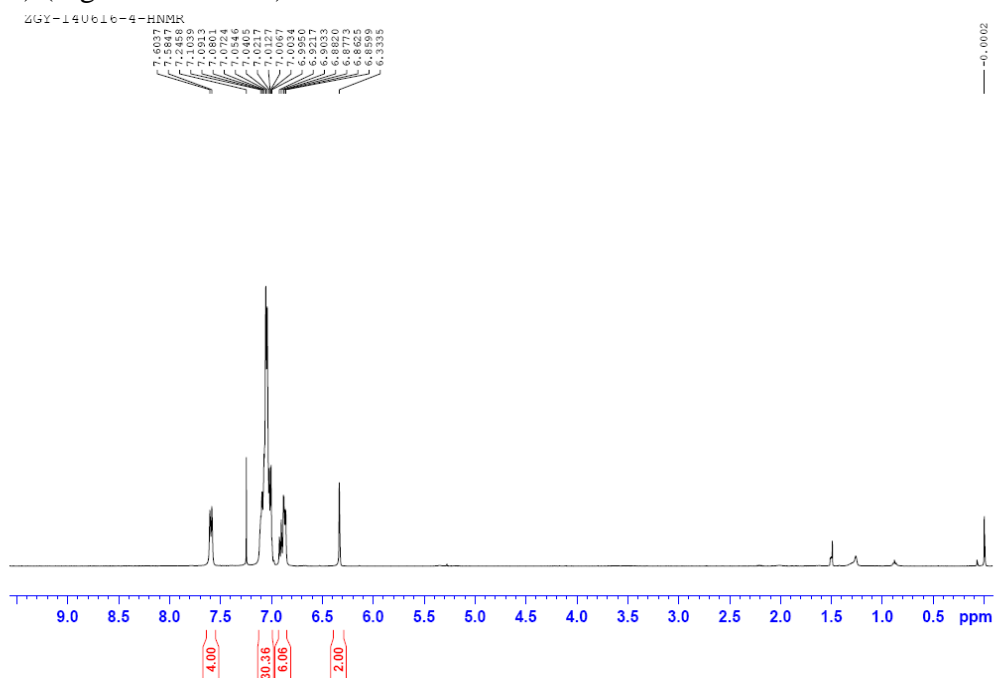

Figure S3. <sup>1</sup>H NMR of the product **2a**

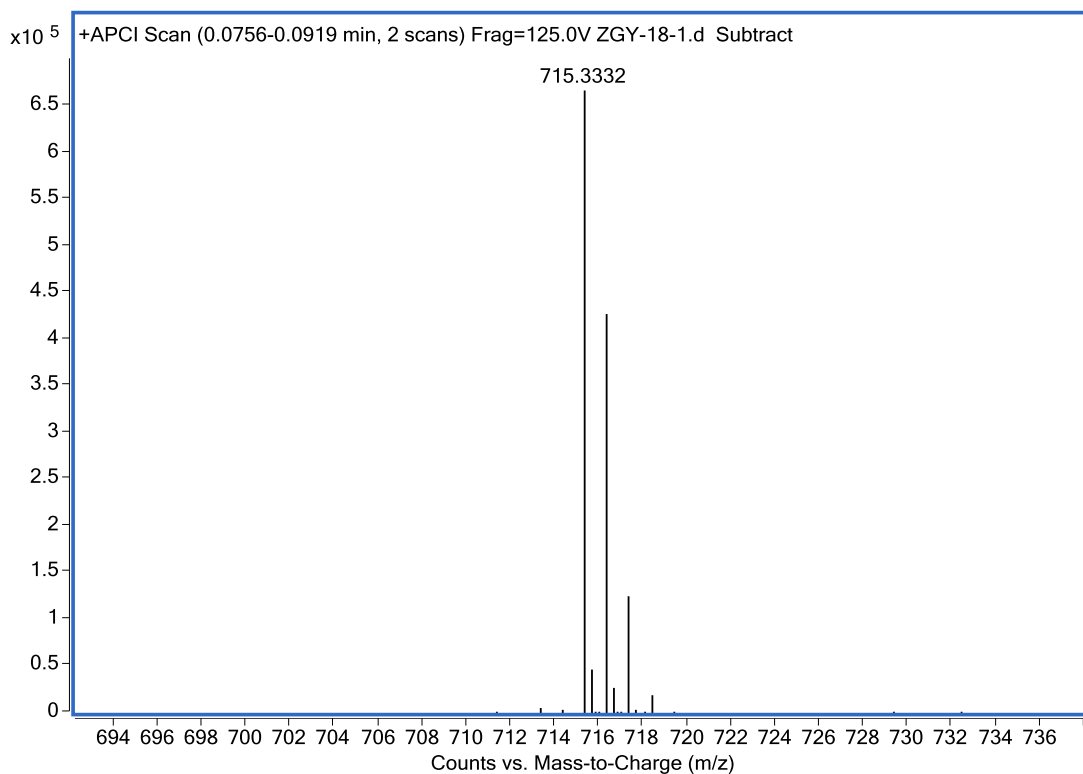

**Figure S4.** HRMS (APCI) of the product **2a**

### 5.1.2 Tetramerization in CD<sub>3</sub>OD

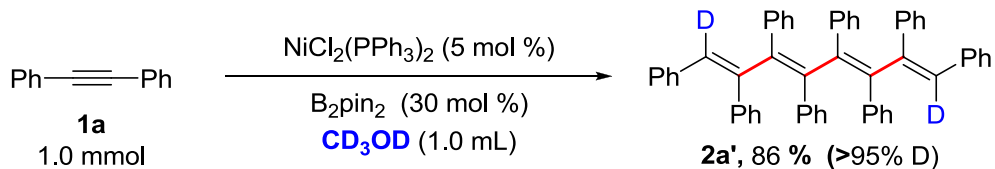

1,2-Diphenylethyne **1a** (178.2 mg, 1.0 mmol),  $\text{NiCl}_2(\text{PPh}_3)_2$  (32.7 mg, 0.05 mmol, 5 mol%),  $\text{B}_2\text{pin}_2$  (76.2 mg, 0.3 mmol, 30 mol%) and  $\text{CD}_3\text{OD}$  (1.0 mL) were added to a 25 mL flame-dried Young-type tube. The mixture was degassed by the freeze-thaw method and supplied with 1 atm of nitrogen, and then stirred at 120 °C for 18 hours. After cooling to room temperature, the solvent was evaporated under reduced pressure and the residue was directly loaded onto a silica gel column (petroleum ether/ethyl acetate = 100/1) to afford the desired product **2a'** as a yellow solid (155.1 mg, 86 %, > 95% D). The compound was characterized by NMR and HRMS (APCI) (Figure S5 and S6).

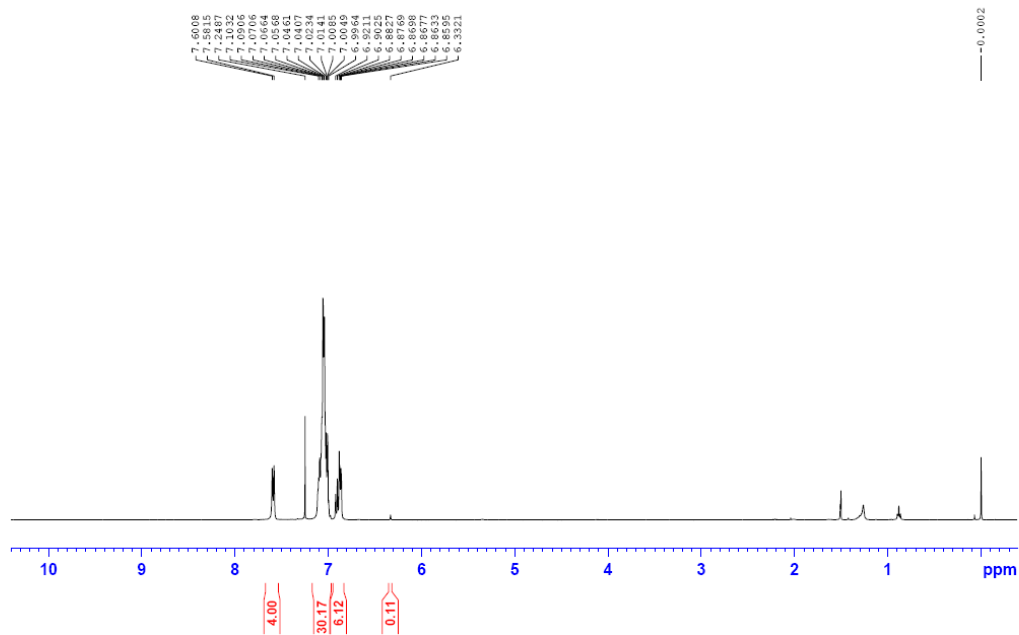

Figure S5. <sup>1</sup>H NMR of the product 2a'

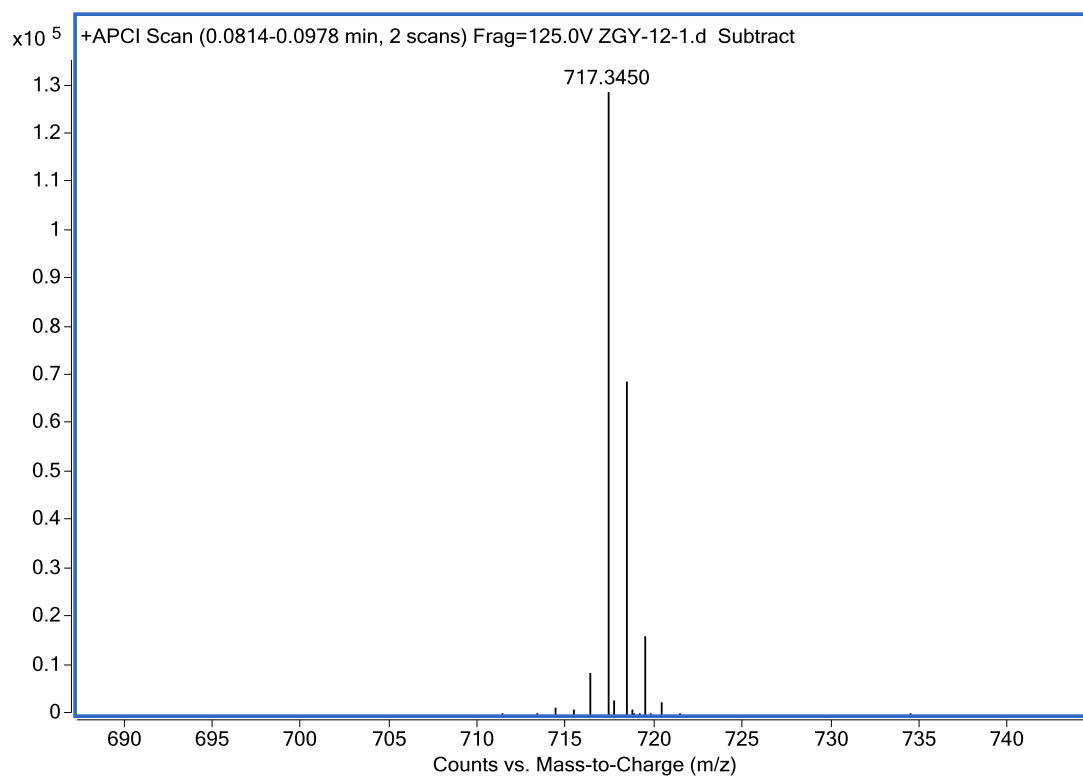

Figure S6. HRMS (APCI) of the product 2a'

### 5.1.3 Tetramerization in CD<sub>3</sub>OH

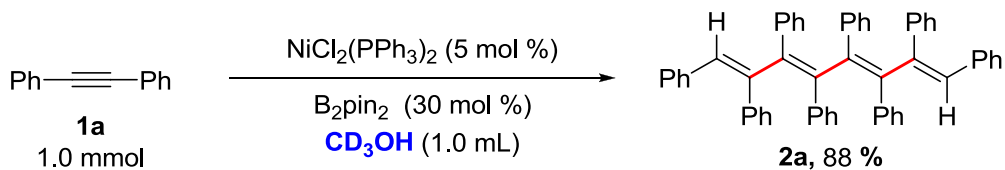

1,2-Diphenylethyne **1a** (178.2 mg, 1.0 mmol), NiCl<sub>2</sub>(PPh<sub>3</sub>)<sub>2</sub> (32.7 mg, 0.05 mmol, 5 mol%), B<sub>2</sub>pin<sub>2</sub> (76.2 mg, 0.3 mmol, 30 mol%) and CD<sub>3</sub>OH (1.0 mL) were added to a 25 mL flame-dried Young-type tube. The mixture was degassed by the freeze-thaw method and supplied with 1 atm of nitrogen, and then stirred at 120 °C for 18 hours. After cooling to room temperature, the solvent was evaporated under reduced pressure and the residue was directly loaded onto a silica gel column (petroleum ether/ethyl acetate = 100/1) to afford the desired product **2a** as a yellow solid (156.9 mg, 88 %). The compound was characterized by NMR and HRMS (APCI) (Figure S7 and S8).

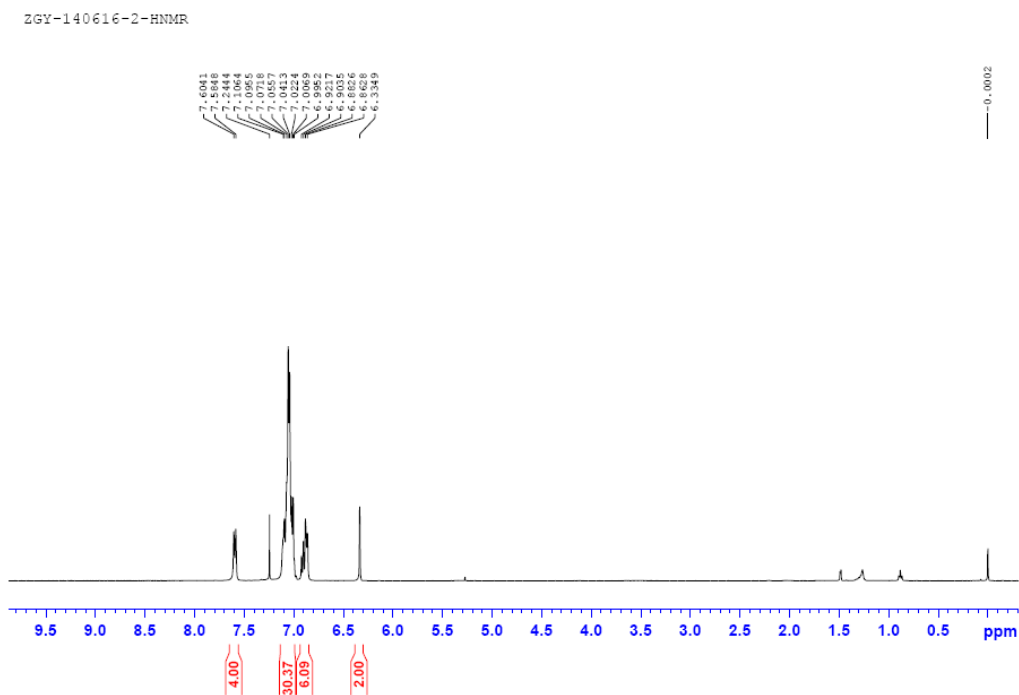

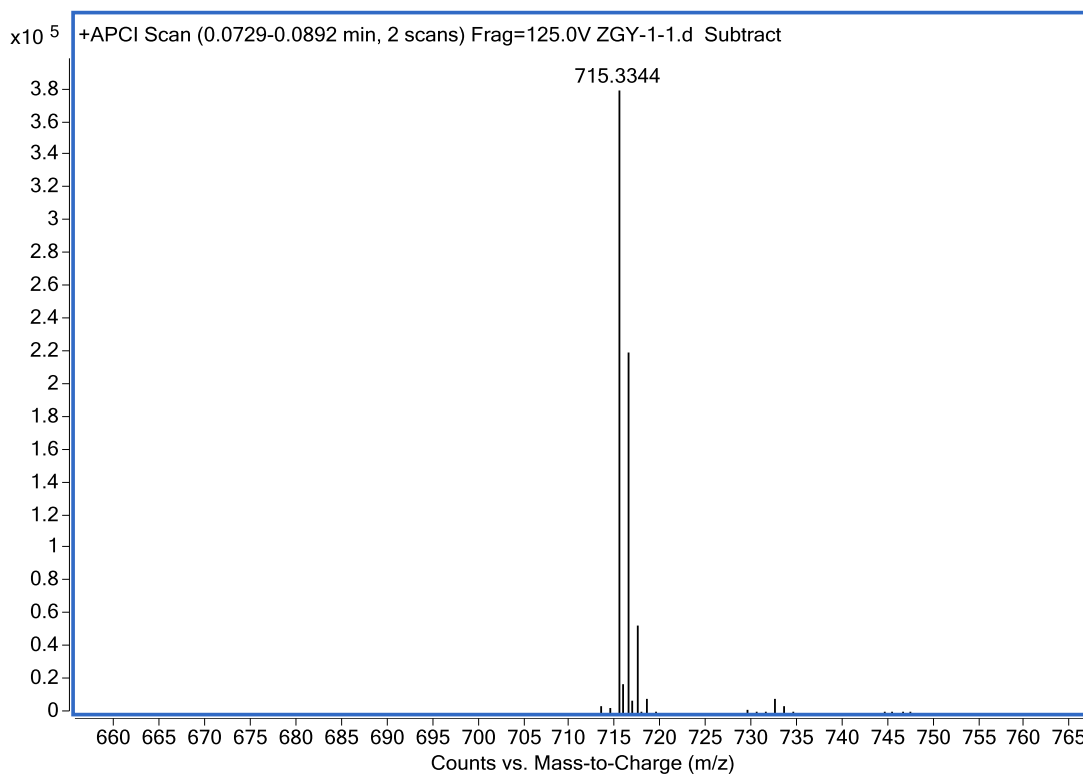

**Figure S8.** HRMS (APCI) of the product **2a**

#### 5.1.4 Tetramerization in CH<sub>3</sub>OD

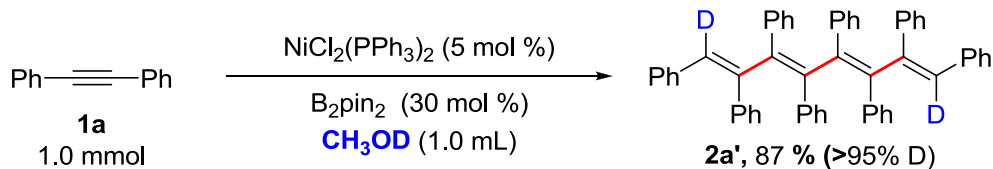

1,2-Diphenylethyne **1a** (178.2 mg, 1.0 mmol), NiCl<sub>2</sub>(PPh<sub>3</sub>)<sub>2</sub> (32.7 mg, 0.05 mmol, 5 mol%), B<sub>2</sub>pin<sub>2</sub> (76.2 mg, 0.3 mmol, 30 mol%) and CH<sub>3</sub>OD (1.0 mL) were added to a 25 mL flame-dried Young-type tube. The mixture was degassed by the freeze-thaw method and supplied with 1 atm of nitrogen, and then stirred at 120 °C for 18 hours. After cooling to room temperature, the solvent was evaporated under reduced pressure and the residue was directly loaded onto a silica gel column (petroleum ether/ethyl acetate = 100/1) to afford the desired product **2a'** as a yellow solid (156.8 mg, 87 %, > 95% D). The compound was characterized by NMR and HRMS (APCI) (Figure S9 and S10).

ZGY-140616-3-<sup>1</sup>H NMR

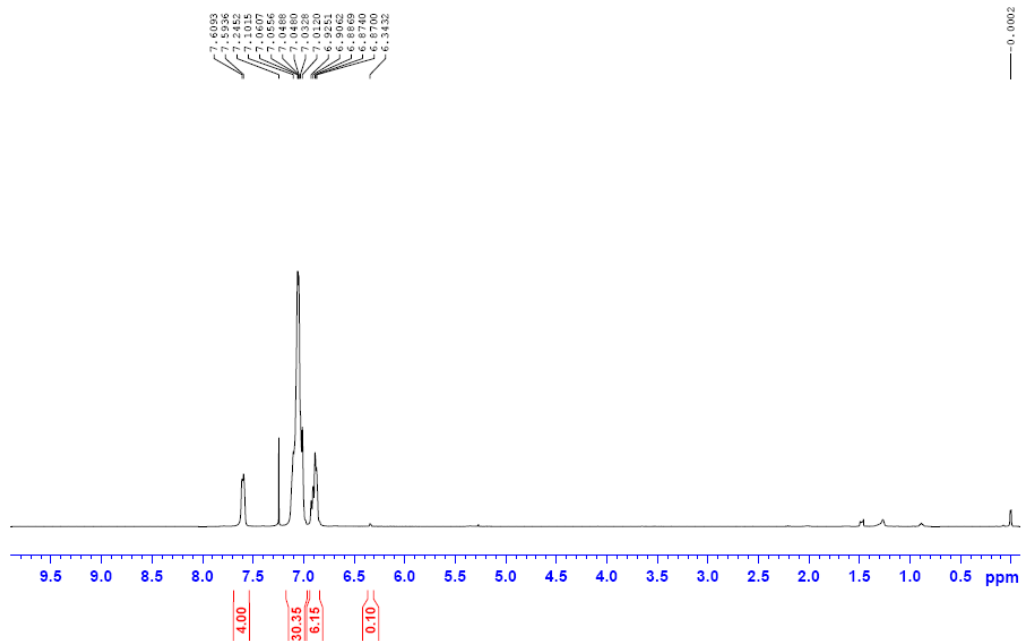

Figure S9. <sup>1</sup>H NMR of the product 2a'

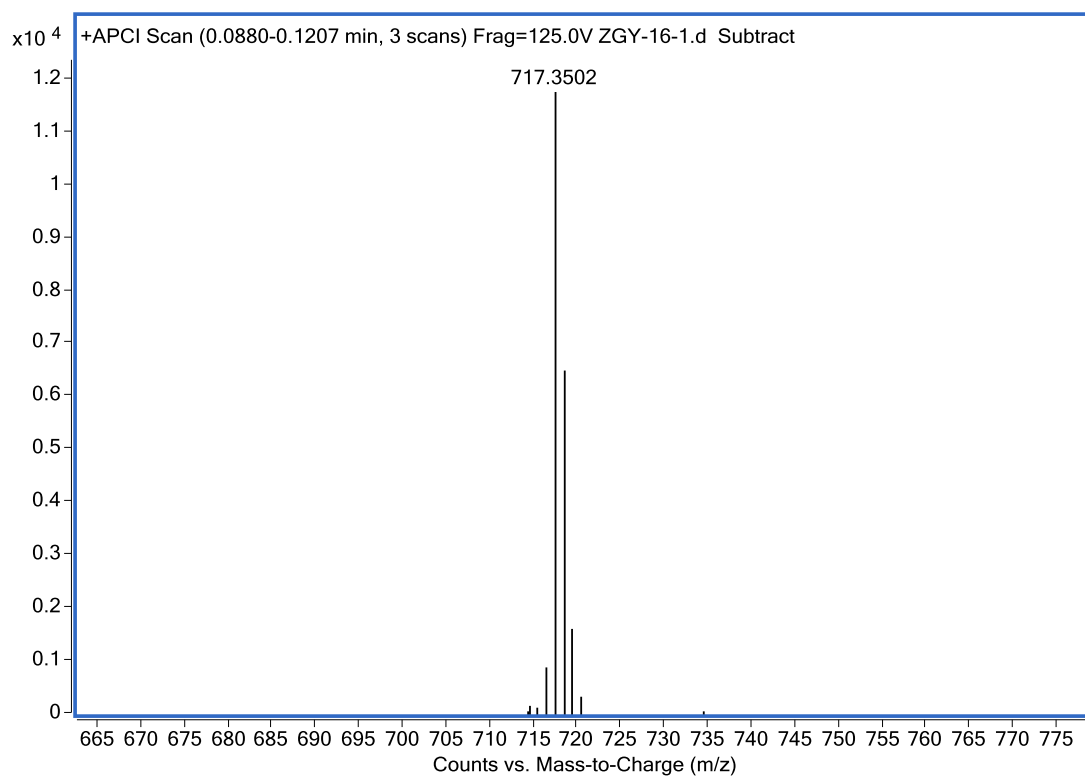

Figure S10. HRMS (APCI) of the product 2a'



## 5.2 HRMS (ESI) studies:

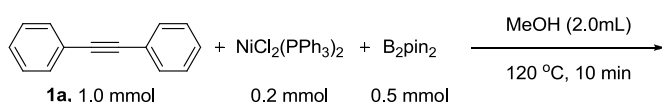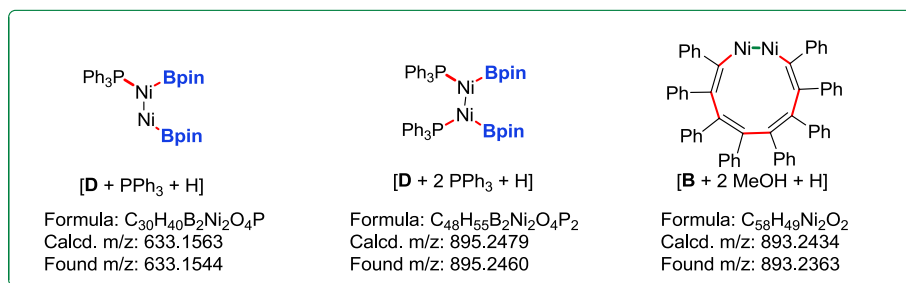

1,2-Diphenylethyne **1a** (178.2 mg, 1.0 mmol), NiCl<sub>2</sub>(PPh<sub>3</sub>)<sub>2</sub> (130.8 mg, 0.2 mmol), B<sub>2</sub>pin<sub>2</sub> (114.3 mg, 0.5 mmol) and MeOH (2.0 mL) were added to a 25 mL flame-dried Young-type tube. The mixture was degassed by the freeze-thaw method and supplied with 1 atm of nitrogen, and then stirred at 120 °C for 10 minutes, some reaction mixture was taken and inject to HRMS. The HRMS (ESI) spectrum was shown in Figure S11, Figure S13 and Figure S15. Three strong peaks at  $m/z = 633.1563$ , 893.2363 and 895.2460 were observed, which were correspond to the mass of dinuclear Ni-Ni complexes [D + PPh<sub>3</sub> + H]<sup>+</sup>, [B + 2 MeOH + H]<sup>+</sup> and [D + 2 PPh<sub>3</sub> + H]<sup>+</sup>.

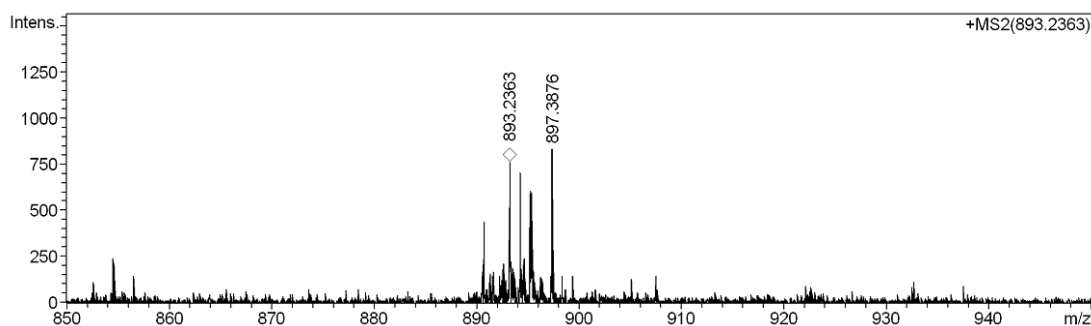

Figure S11. HRMS (ESI) spectrum of [B + 2 MeOH + H]<sup>+</sup>.

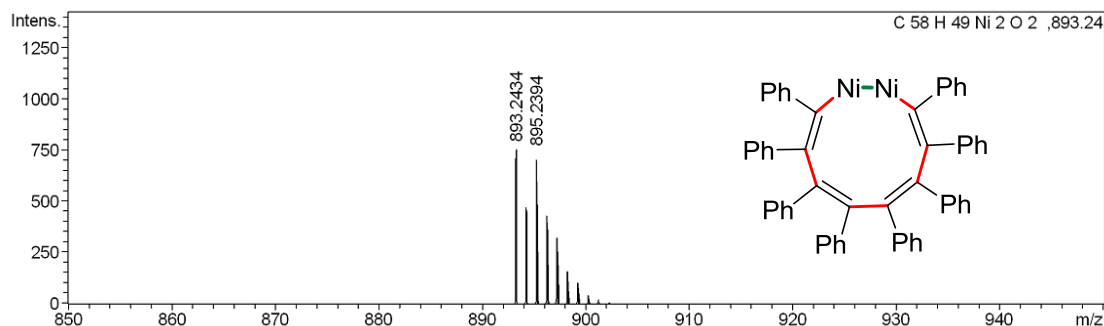

Figure S12. Calcd. HRMS (ESI) spectrum of [B + 2 MeOH + H]<sup>+</sup>.

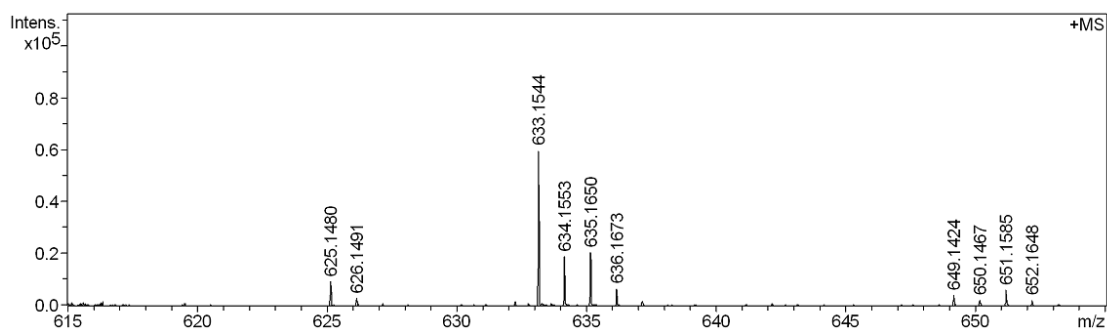

**Figure S13.** HRMS (ESI) spectrum of  $[D + PPh_3 + H]^+$ .

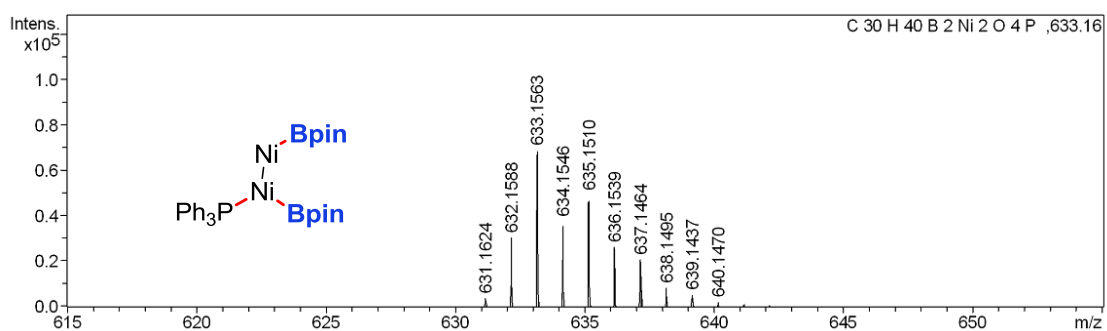

**Figure S14.** Calcd. HRMS (ESI) spectrum of  $[D + PPh_3 + H]^+$ .

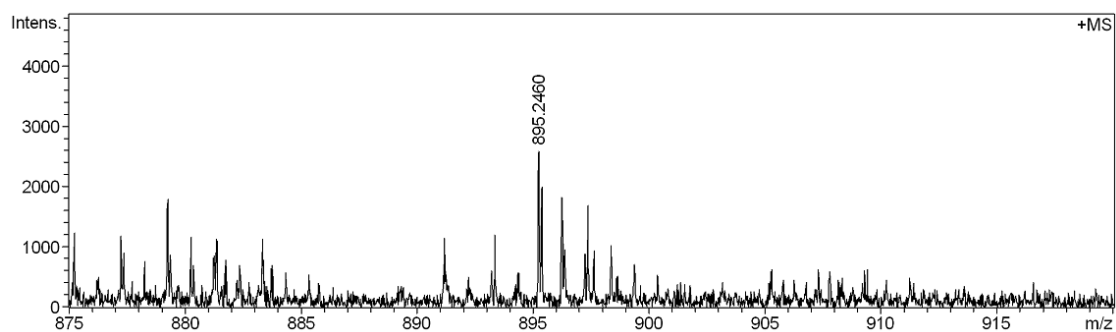

**Figure S15.** HRMS (ESI) spectrum of  $[D + 2 PPh_3 + H]^+$ .

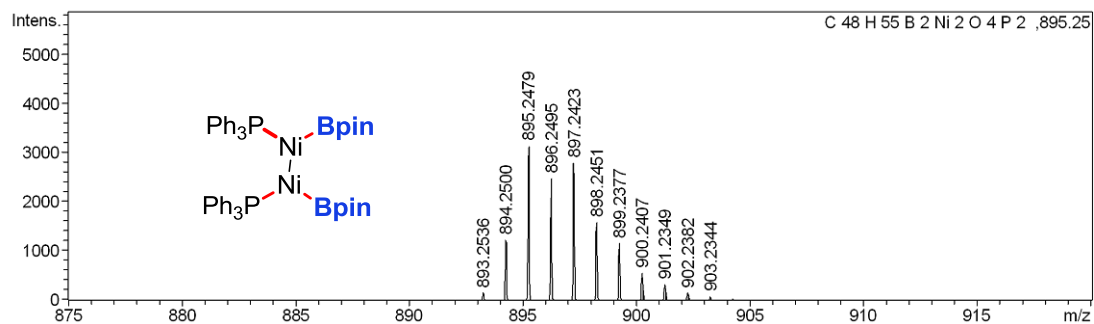

**Figure S16.** Calcd. HRMS (ESI) spectrum of  $[D + 2 PPh_3 + H]^+$ .

The result of two stage mass spectrometry indicated that the peak  $m/z = 633.1544$  was recognized as  $[\mathbf{D} + \text{PPh}_3 + \text{H}]^+$ .

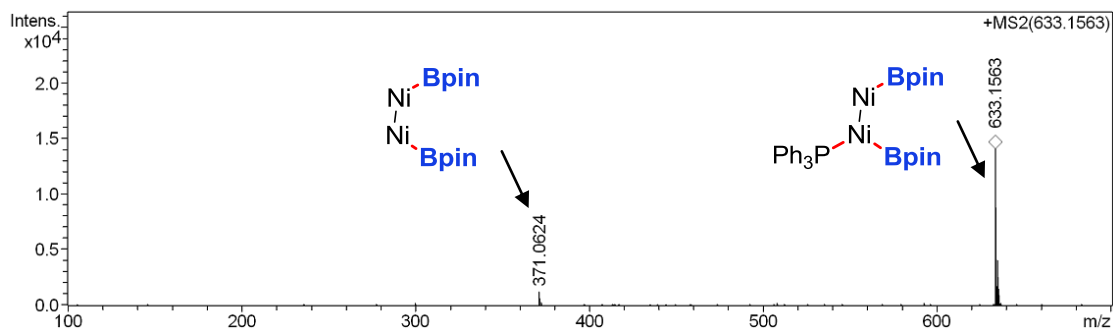

**Figure S17.** Two stage mass spectrum of the peak  $m/z = 633.1544$ .

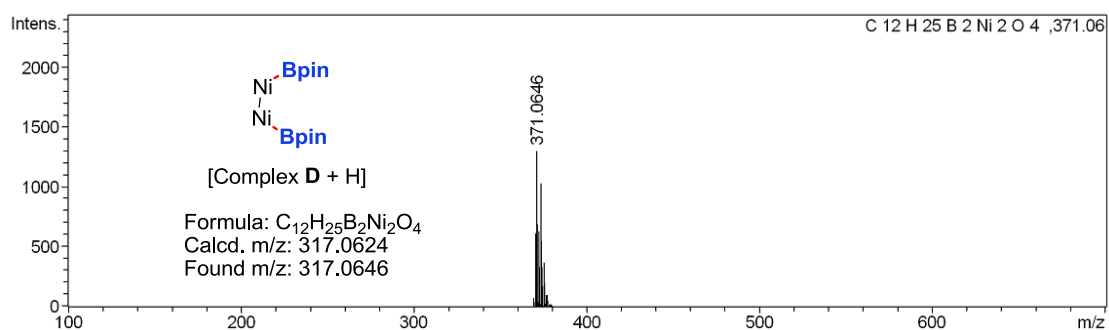

**Figure S18.** Calcd. HRMS (ESI) spectrum of  $[\mathbf{D} + \text{H}]^+$ .

The result of two stage mass spectrometry indicated that the peak  $m/z = 895.2460$  was recognized as  $[\mathbf{D} + 2 \text{PPh}_3 + \text{H}]^+$ .

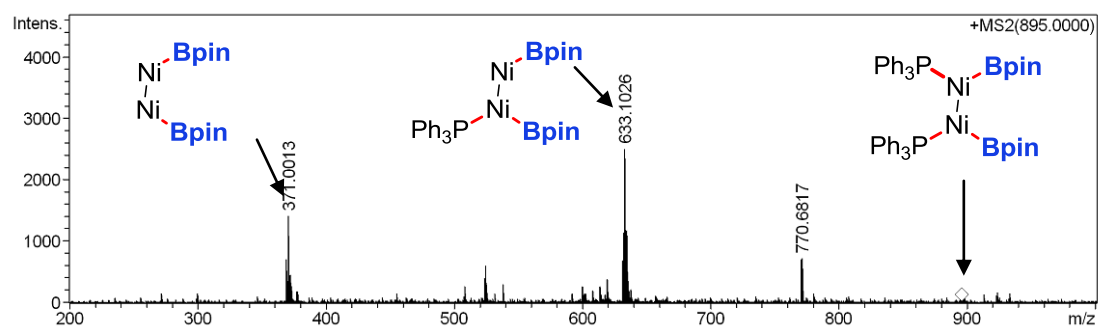

**Figure S19.** Two stage mass spectrum of the peak  $m/z = 895.2460$

### 5.3 Stoichiometric reaction:

#### 5.3.1 Stoichiometric reaction of **1a** with Ni(COD)<sub>2</sub>

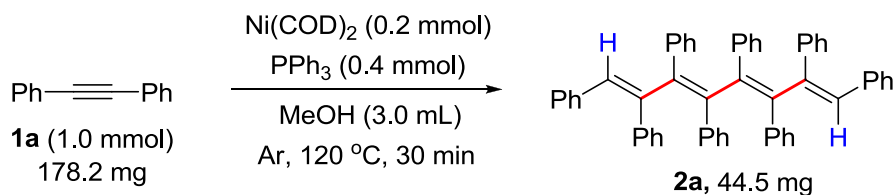

Ni(COD)<sub>2</sub> (55.2 mg, 0.2 mmol), PPh<sub>3</sub> (104.8 mg, 0.4 mmol, 2.0 equiv) and CH<sub>3</sub>OH (3.0 mL) were added to a 25 mL flame-dried Young-type tube in glove box. The mixture was stirred at 120 °C for 30 minutes. After cooling to room temperature, 1,2-diphenylethyne **1a** (178.2 mg, 1.0 mmol, 5.0 equiv) was added and stirred at 120 °C for 24 hours. After cooling to room temperature, the solvents was evaporated under reduced pressure and the residue was directly loaded onto a silica gel column (petroleum ether/ethyl acetate = 100/1) to afford the desired product **2a** as a yellow solid (44.5 mg).

#### 5.3.2 Stoichiometric reaction of **3a** with NiCl<sub>2</sub>(PPh<sub>3</sub>)<sub>2</sub>

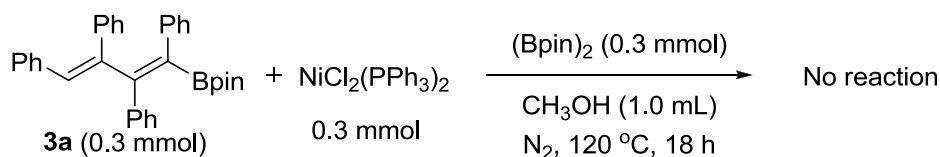

**3a** (145.3 mg, 0.3 mmol), NiCl<sub>2</sub>(PPh<sub>3</sub>)<sub>2</sub> (196.2 mg, 0.3 mmol), B<sub>2</sub>pin<sub>2</sub> (76.2 mg, 0.3 mmol, 30 mol%) and CH<sub>3</sub>OH (1.0 mL) were added to a 25 mL flame-dried Young-type tube. The mixture was degassed by the freeze-thaw method and supplied with 1 atm of nitrogen, and then stirred at 120 °C for 18 hours. No **2a** was detected.

## 6. Kinetic experiments

### Synthesis of 2-propoxy-4,4,5,5-tetramethyl-[1,3,2]dioxaborolane (*n*-PrOBpin)<sup>2</sup>

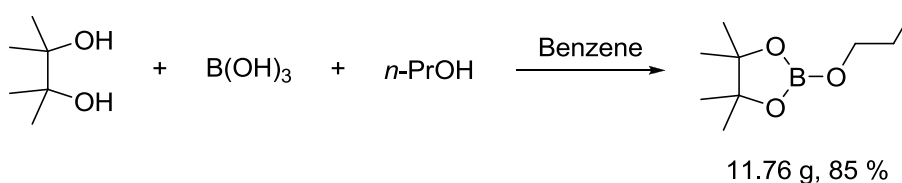

Boric acid (4.96 g, 80 mmol), dry *n*-propanol (24.04 g, 400 mmol), pinacol (9.44g, 80mmol) and benzene (50 mL) were added to a 100 mL flame-dried reactor. After stirring at room temperature for 30 minutes, the *n*-propanol/water/benzene ternary azeotrope was distilled off for 12 hours, and most of the residual benzene was removed *in vacuo* at 30 °C. The crude product was distilled to give the title compound as a colourless liquid (11.76 g, 85%).

<sup>1</sup>H NMR (400 MHz, CDCl<sub>3</sub>) δ 0.80-0.85 (m, 3H), 1.16-1.17 (m, 12H), 1.47-1.52 (m, 2H), 3.69-3.73 (m, 2H).

<sup>13</sup>C NMR (100 MHz, CDCl<sub>3</sub>) δ 10.0, 24.4, 24.6, 66.4, 82.4.

#### 6.1 The standard IR spectra and the reactions in *n*-PrOH

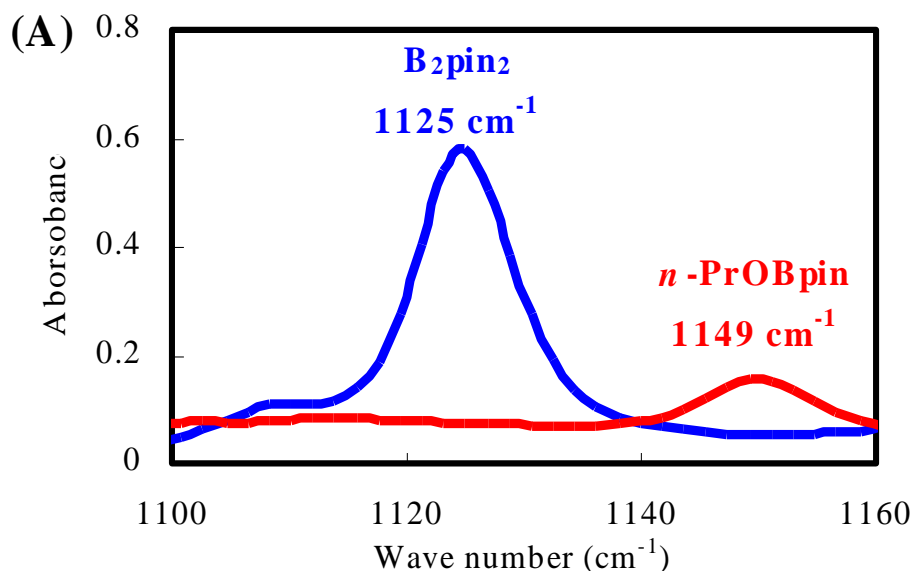

(A) Standard IR spectra of *n*-PrOBpin and B<sub>2</sub>pin<sub>2</sub>.

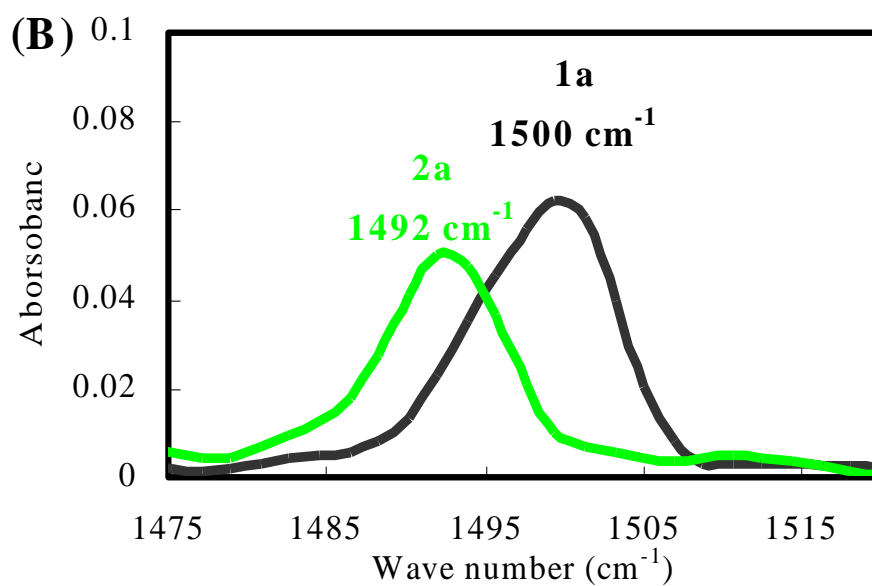

(B) Standard IR spectra of **1a** and **2a**.

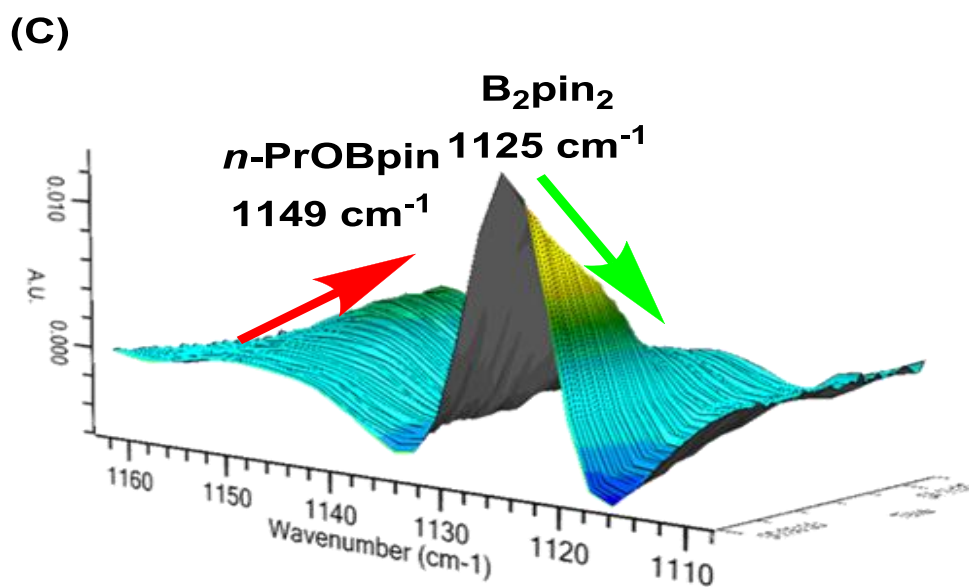

(C) Depletion of **B<sub>2</sub>pin<sub>2</sub>** and formation of *n*-PrOBpin.

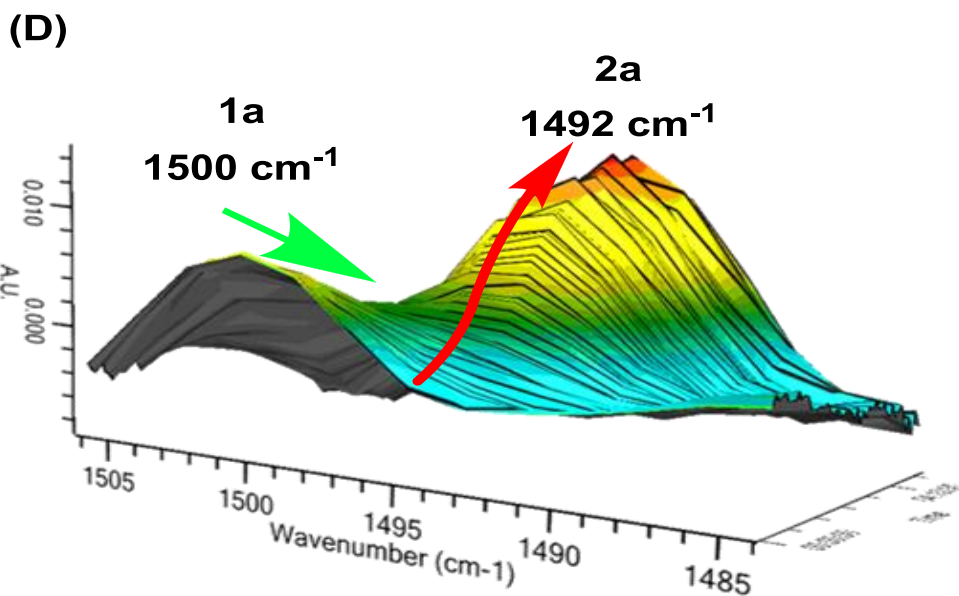

(D) Depletion of **1a** and formation of **2a**.

## 6.2 Different diphenylethyne (**1a**) loadings

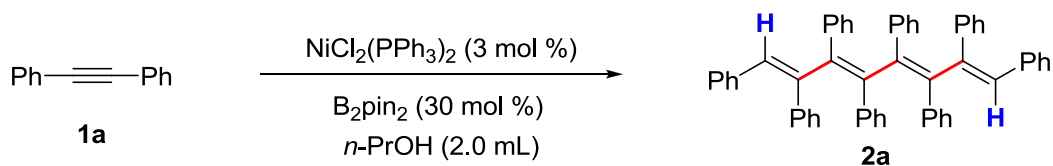

In a dried self-prepared three-necked micro reactor with a magnetic stirrer,  $\text{NiCl}_2(\text{PPh}_3)_2$  (19.6 mg, 0.03 mmol) and  $\text{B}_2\text{pin}_2$  (76.2 mg, 0.3 mmol, 30 mol%) were added. The reactor was allowed to be purged with nitrogen three times, *n*-PrOH (1.0 mL) was added in via a syringe. After the mixture was allowed to stir for 13 minutes at 120 °C and the different amount of 1,2-diphenylethyne **1a** (1.0 mmol, 0.8 mmol, 0.6 mmol, 0.4 mmol) was dissolved in *n*-PrOH (1.0 mL) and added in via a syringe. Then the system was stirred at 120 °C for 2-6 hours. After cooling to room temperature, *n*-hexadecane was added to the reaction mixture as internal standard. The reaction mixture was analyzed by GC.

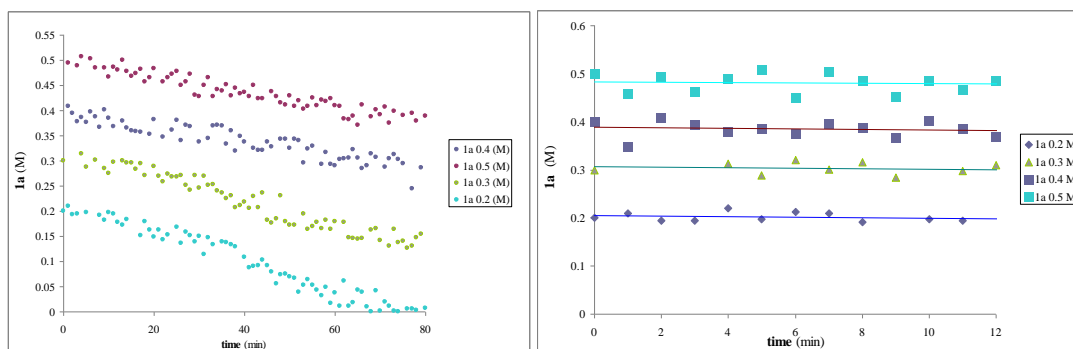

| entry                      | 1     | 2    | 3     | 4     |
|----------------------------|-------|------|-------|-------|
| <b>1a</b> loading (M)      | 0.2   | 0.3  | 0.4   | 0.5   |
| $r_{ini}$ ( $10^{-4}$ M/s) | 0.093 | 0.09 | 0.094 | 0.089 |

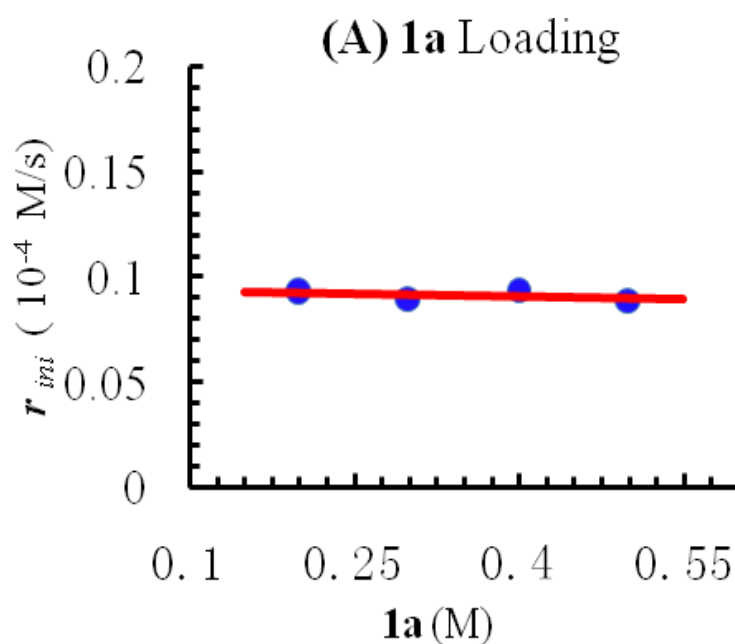

### 6.3 Different $B_2pin_2$ loadings

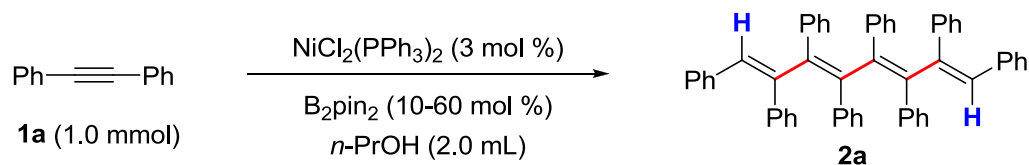

In a dried self-prepared three-necked micro reactor with a magnetic stirrer,  $\text{NiCl}_2(\text{PPh}_3)_2$  (19.6 mg, 0.03 mmol) and the different amount of  $B_2pin_2$  (0.1 mmol, 0.2 mmol, 0.3 mmol, 0.5 mmol, 0.6 mmol) were added. The reactor was allowed to be



purged with nitrogen three times, *n*-PrOH (1.0 mL) was added in via a syringe. After the mixture was allowed to stir for 13 minutes at 120 °C, and the 1,2-diphenylethyne **1a** (178.2 mg, 1.0 mmol) was dissolved in *n*-PrOH (1.0 mL) and added in via a syringe. Then the system was stirred at 120 °C for 2-6 hours. After cooling to room temperature, *n*-hexadecane was added to the reaction mixture as internal standard. The reaction mixture was analyzed by GC.

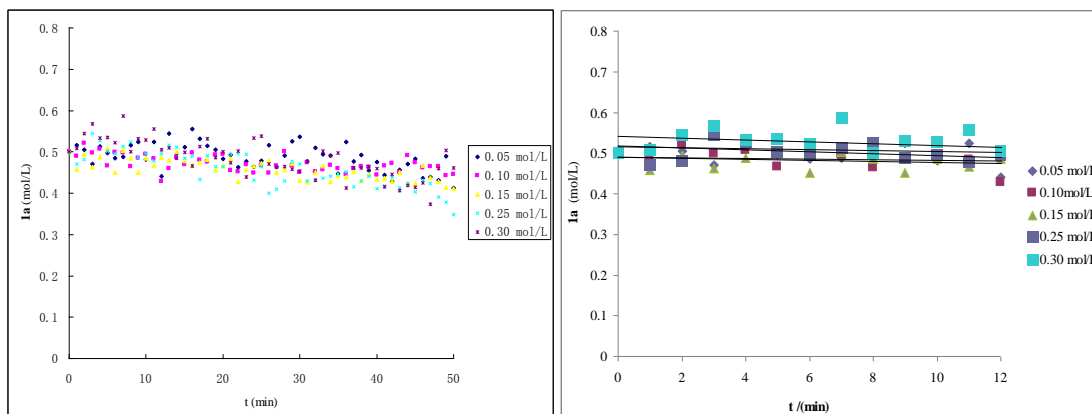

| entry                                           | 1     | 2     | 3     | 4     | 5     |
|-------------------------------------------------|-------|-------|-------|-------|-------|
| <b>B<sub>2</sub>pin<sub>2</sub></b> loading (M) | 0.05  | 0.10  | 0.15  | 0.25  | 0.30  |
| $r_{ini}$ ( $10^{-4}$ M/s)                      | 0.091 | 0.096 | 0.089 | 0.096 | 0.089 |

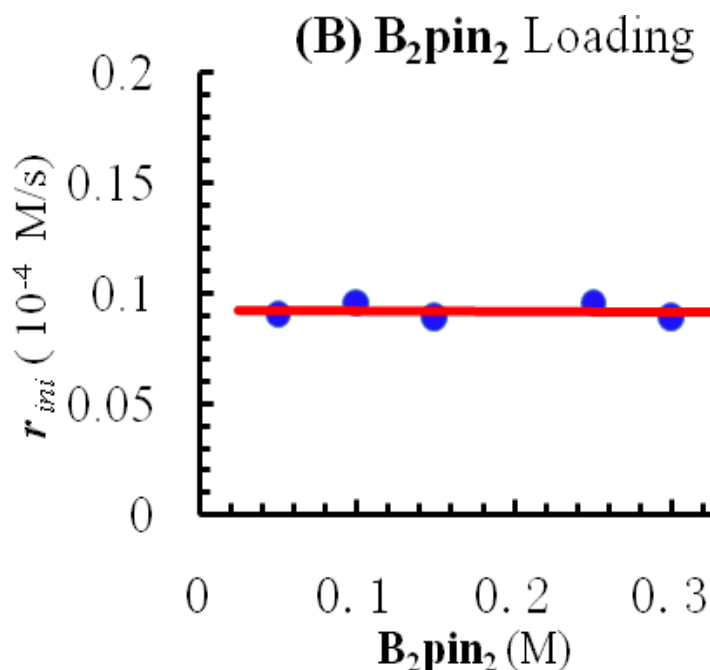

## 6.4 Different NiCl<sub>2</sub>(PPh<sub>3</sub>)<sub>2</sub> loadings

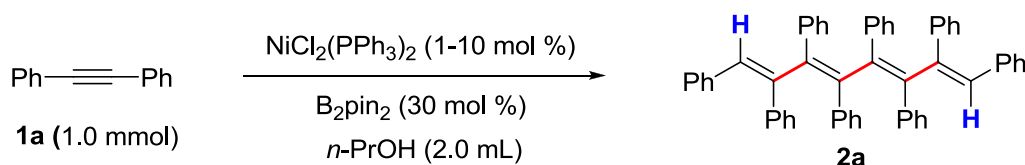

In a dried self-prepared three-necked micro reactor with a magnetic stirrer, the different amount of NiCl<sub>2</sub>(PPh<sub>3</sub>)<sub>2</sub> (0.01 mmol, 0.02 mmol, 0.03 mmol, 0.04 mmol, 0.05 mmol, 0.06 mmol, 0.08 mmol, 0.10 mmol) and B<sub>2</sub>pin<sub>2</sub> (76.2 mg, 0.3 mmol, 30 mol%) were added. The reactor was allowed to be purged with nitrogen three times, *n*-PrOH (1.0 mL) was added in via a syringe. After the mixture was allowed to stir for 13 minutes at 120 °C, and the 1,2-diphenylethyne **1a** (178.2 mg, 1.0 mmol) was dissolved in *n*-PrOH (1.0 mL) and added in via a syringe. Then the system was stirred at 120 °C for 2-6 hours. After cooling to room temperature, *n*-hexadecane was added to the reaction mixture as internal standard. The reaction mixture was analyzed by GC.

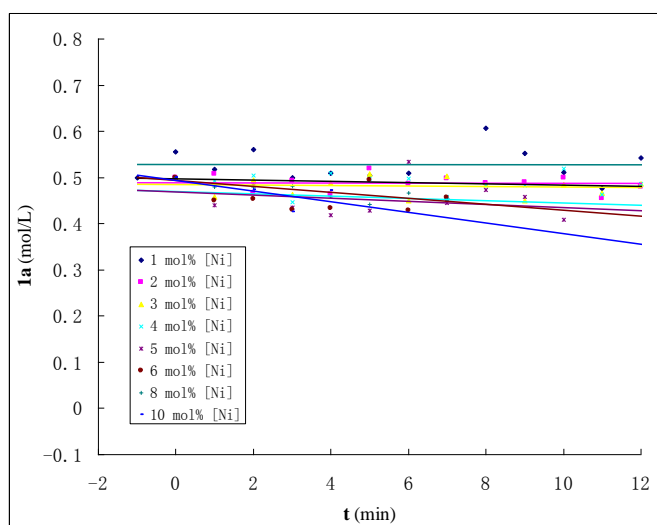

| entry                                                  | 1       | 2     | 3       | 4     | 5       | 6     | 7      | 8     |
|--------------------------------------------------------|---------|-------|---------|-------|---------|-------|--------|-------|
| NiCl <sub>2</sub> (PPh <sub>3</sub> ) <sub>2</sub> (M) | 0.005   | 0.01  | 0.015   | 0.02  | 0.025   | 0.03  | 0.04   | 0.05  |
| C <sub>cat</sub> <sup>2</sup> (M) <sup>2</sup>         | 0.00002 | 0.000 | 0.00022 | 0.000 | 0.00062 | 0.000 | 0.0001 | 0.002 |
| r <sub>ini</sub> (10 <sup>-4</sup> M/s)                | 5       | 1     | 5       | 4     | 5       | 9     | 6      | 5     |
|                                                        | 0.003   | 0.019 | 0.089   | 0.225 | 0.416   | 0.563 | 1.07   | 1.919 |

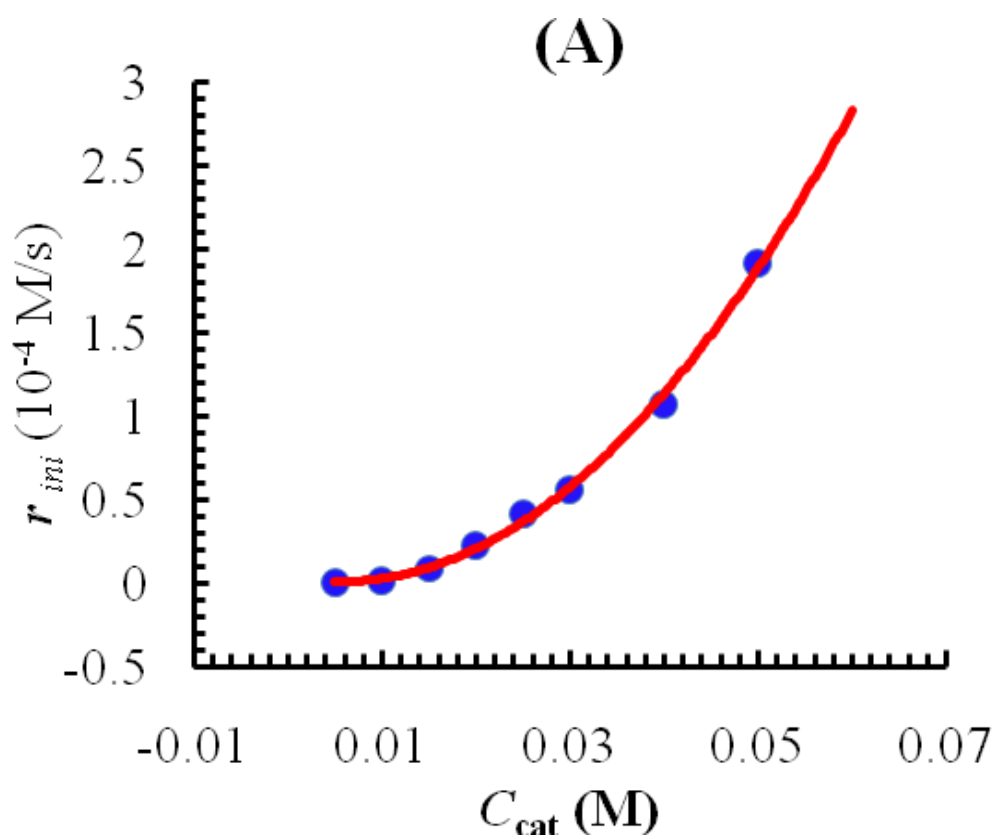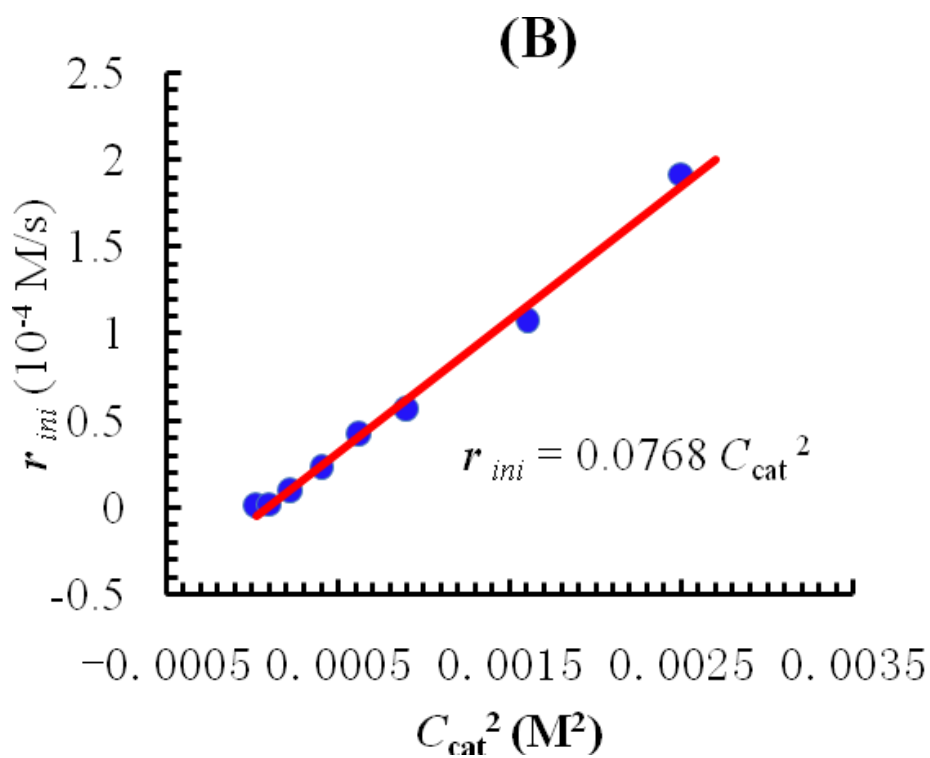

$$r_{ini} = 0.0768c_{cat}^2 - 7.43 \times 10^{-6} \quad R = 0.9968$$

## 6.5 Arrhenius parameters of Nickel-catalyzed reductive coupling

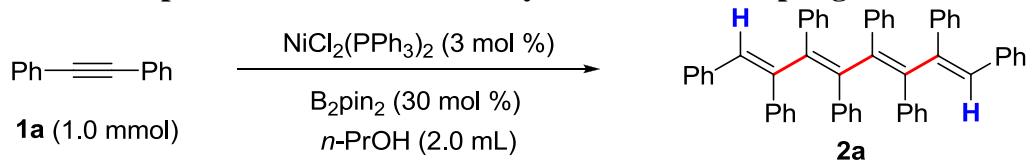

In a dried self-prepared three-necked micro reactor with a magnetic stirrer,  $\text{NiCl}_2(\text{PPh}_3)_2$  (19.6 mg, 0.03 mmol) and  $\text{B}_2\text{pin}_2$  (76.2 mg, 0.3 mmol) were added. The reactor was purged with nitrogen for three times, *n*-PrOH (1.0 mL) was added in via a syringe. After the mixture was allowed to stir for 13 minutes at 120 °C, and was transferred to the different temperature (80 °C, 90 °C, 100 °C, 110 °C, 120 °C, 130 °C). And the 1,2-diphenylethyne **1a** (178.2 mg, 1.0 mmol) was dissolved in *n*-PrOH (1.0 mL) and added in via a syringe. Then the system was stirred at the different temperature for 2-6 hours. After cooling to room temperature, *n*-hexadecane was added to the reaction mixture as internal standard. The reaction mixture was analyzed by GC.

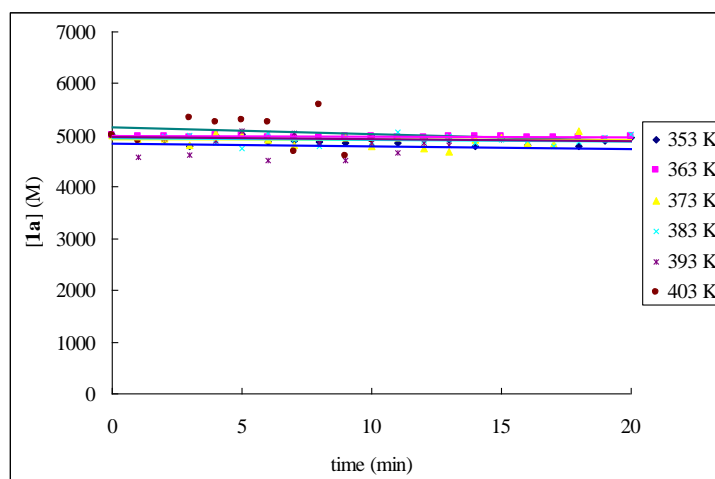

| T (K) | 1/T (K <sup>-1</sup> ) | k (mL mol <sup>-1</sup> s <sup>-1</sup> ) | ln( $\frac{kC^\ominus}{T}$ ) |
|-------|------------------------|-------------------------------------------|------------------------------|
| 353   | 0.002833               | 0.006666667                               | -10.88                       |
| 363   | 0.002755               | 0.010666667                               | -10.44                       |
| 373   | 0.002681               | 0.023111111                               | -9.69                        |
| 383   | 0.002611               | 0.029777778                               | -9.46                        |
| 393   | 0.002545               | 0.039555556                               | -9.20                        |
| 403   | 0.002481               | 0.098666667                               | -8.31                        |

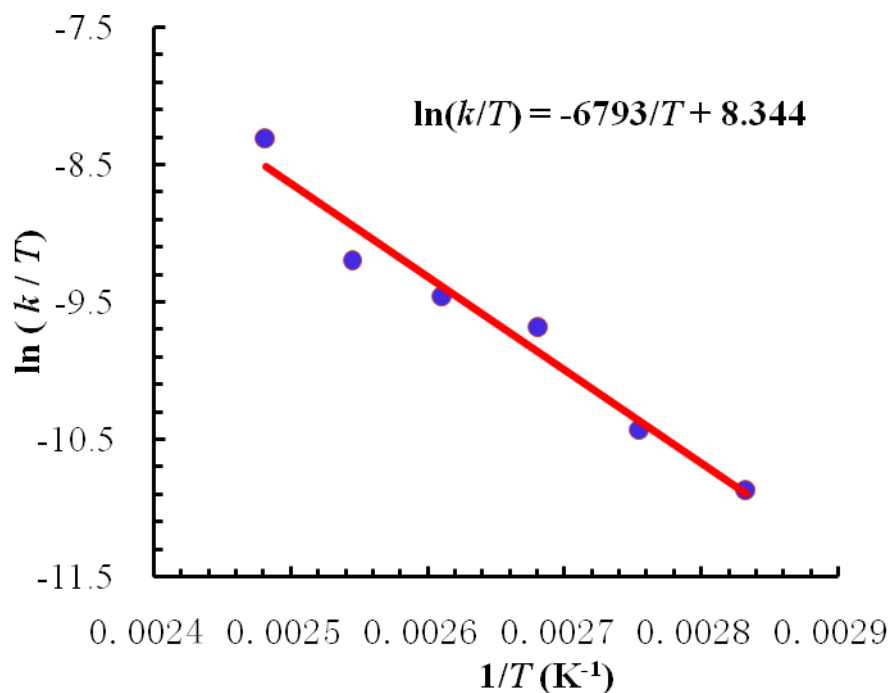

$$k = \frac{k_B T}{h} (c^\ominus)^{-1} \exp\left(\frac{\Delta_r^\ddagger S_m^\ominus(c^\ominus)}{R}\right) \exp\left(-\frac{\Delta_r^\ddagger H_m^\ominus(c^\ominus)}{RT}\right) \quad (1)$$

$$\ln\left(\frac{kc^\ominus}{T}\right) = \ln\frac{k_B}{h} + \frac{\Delta_r^\ddagger S_m^\ominus(c^\ominus)}{R} - \frac{\Delta_r^\ddagger H_m^\ominus(c^\ominus)}{R} \frac{1}{T} \quad (2)$$

$$k_B: 1.38 \cdot 10^{-23} \text{ J K}^{-1}$$

$$h: 6.626 \cdot 10^{-34} \text{ J s}$$

$$c^\ominus: 1 \text{ mol mL}^{-1}$$

$$[\text{Ni}] = 0.015 \text{ mol L}^{-1}, \quad k = \frac{r}{c_{cat}^2}$$

$$\ln \frac{k}{T} = -\frac{6793}{T} + 8.344, \quad R = 0.9818 \quad (3)$$

$$\Delta_r^\ddagger H_m^\ominus = 56.5 \text{ kJ} \cdot \text{mol}^{-1}$$

$$\Delta_r^\ddagger S_m^\ominus = -128 \text{ J} \cdot \text{mol}^{-1} \cdot \text{K}^{-1}$$

## 6.6 The role of diarylalkynes

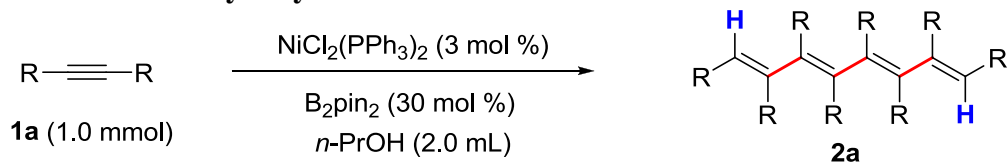

In a dried self-prepared three-necked micro reactor with a magnetic stirrer,  $\text{NiCl}_2(\text{PPh}_3)_2$  (19.6 mg, 0.03 mmol) and  $\text{B}_2\text{pin}_2$  (76.2 mg, 0.3 mmol) were added. The reactor was purged with nitrogen for three times,  $n\text{-PrOH}$  (1.0 mL) was added in via a syringe. After the mixture was allowed to stir for 13 minutes at  $120^\circ\text{C}$ , and the different of diarylethyne **1** (1.0 mmol) was dissolved in  $n\text{-PrOH}$  (1.0 mL) and added in via a syringe. Then the system was stirred at  $120^\circ\text{C}$  for 2-6 hours. After cooling to room temperature,  $n\text{-hexadecane}$  was added to the reaction mixture as internal standard. The reaction mixture was analyzed by GC.

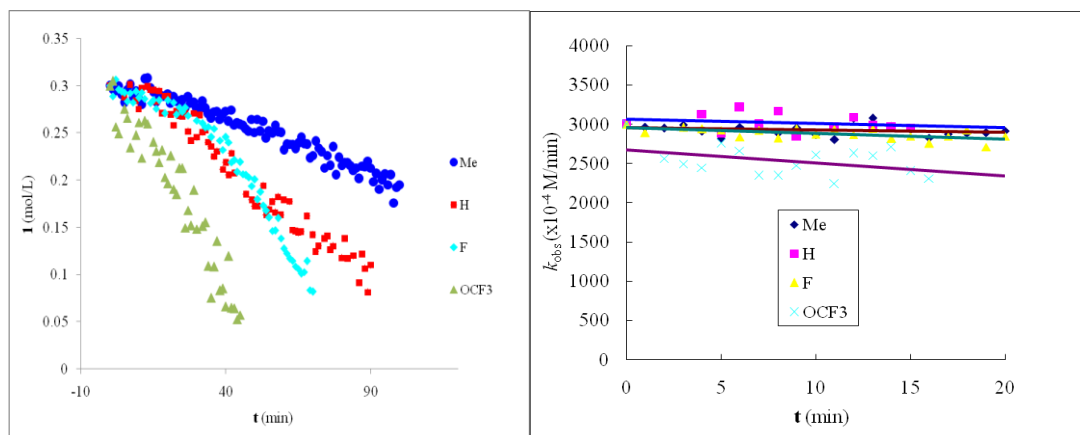

| entry                         | 1       | 2     | 3        | 4              |
|-------------------------------|---------|-------|----------|----------------|
| <i>para</i> -                 | Me      | H     | F        | $\text{OCF}_3$ |
| $k$ ( $\times 10^{-4}$ M/min) | -2.941  | -5.44 | -6.4638  | -16.508        |
| $\sigma_p$                    | -0.17   | 0     | 0.06     | 0.35           |
| $\log(k/k_H)$                 | -0.2671 | 0     | 0.074889 | 0.482096       |

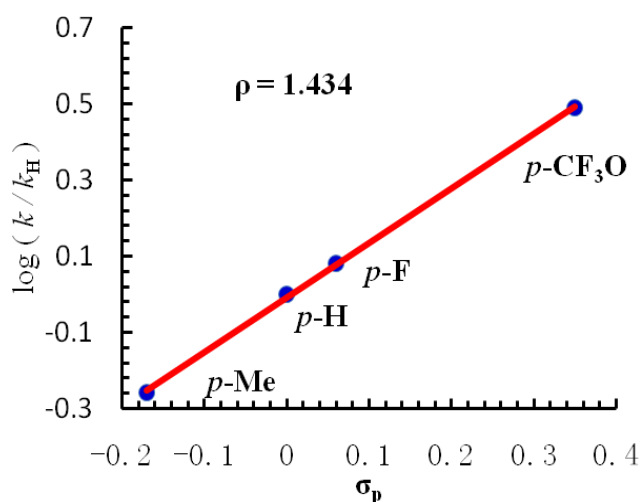

## 7. TON experiment

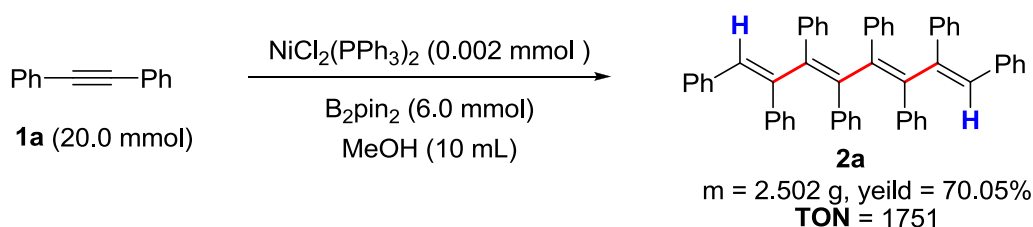

1,2-Diphenylethyne **1a** (3.564 g, 20.0 mmol), NiCl<sub>2</sub>(PPh<sub>3</sub>)<sub>2</sub> (1.3 mg, 0.002 mmol, 1 mol %), B<sub>2</sub>pin<sub>2</sub> (1.5234 g, 6.0 mmol, 30 mol %) and MeOH (10.0 mL) were added to a 100 mL flame-dried Young-type tube. The mixture was degassed by the freeze-thaw method and supplied with 1 atm of nitrogen, and then stirred at 120 °C for 12 days. After cooling to room temperature, the solvents were evaporated under reduced pressure and the residue was directly loaded onto a silica gel column (petroleum ether/ethyl acetate = 100/1) to afford the desired product **2a** (2.502 g, in 70.05 % yield, **TON** = 1751).

## References:

- (1) P. Chuentragool, K. Vongnamb, P. Rashatasakhon, M. Sukwattanasinitt and S. Wacharasindhu, *Tetrahedron*. 2011, **67**, 8177.
- (2) N. Boudet, J. R. Lachs and P. Knochel, *Org. Lett.* 2007, **9**, 5525.

## 8. Copies for <sup>1</sup>H NMR and <sup>13</sup>C NMR

ZGY-140616-2-HNMR

7.6041  
7.5848  
7.2444  
7.1064  
7.0955  
7.0718  
7.0557  
7.0413  
7.0224  
7.0069  
6.9952  
6.9217  
6.9035  
6.8826  
6.8628  
6.3349

0.0002

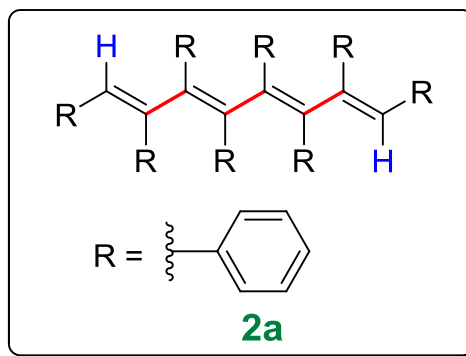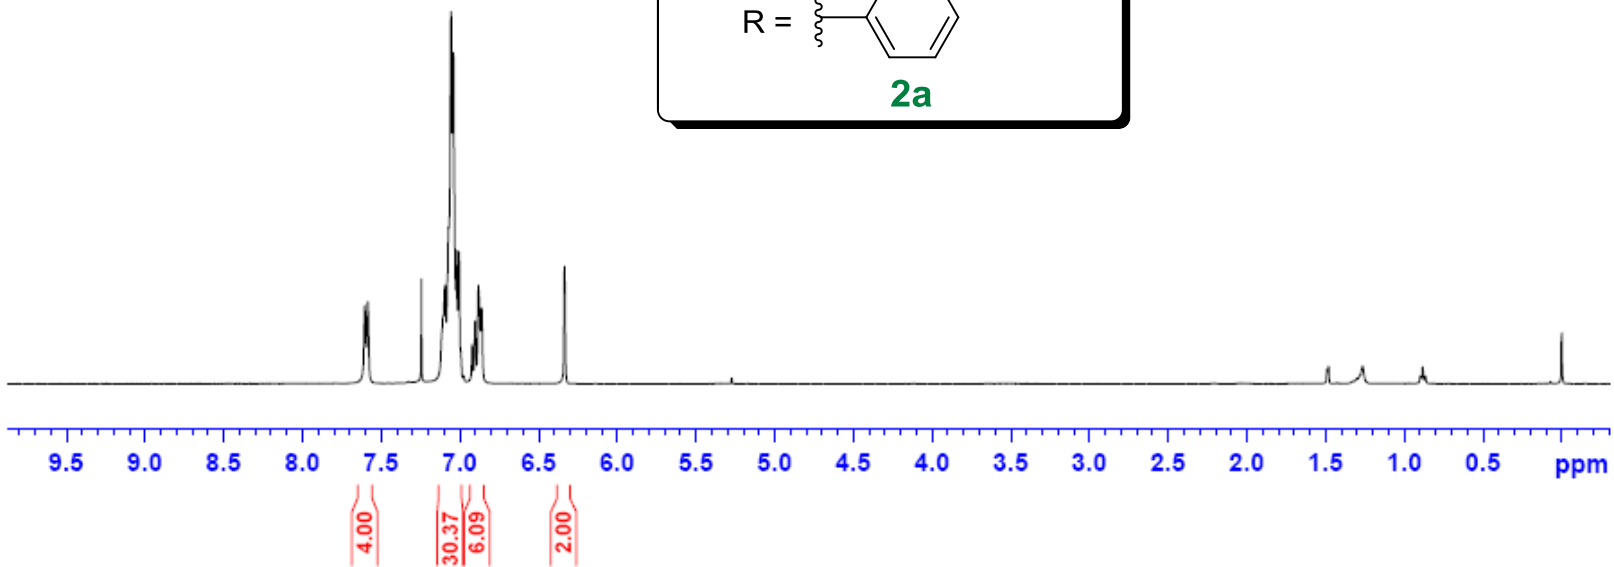



20140617-ZCY-1-CNMR (11)

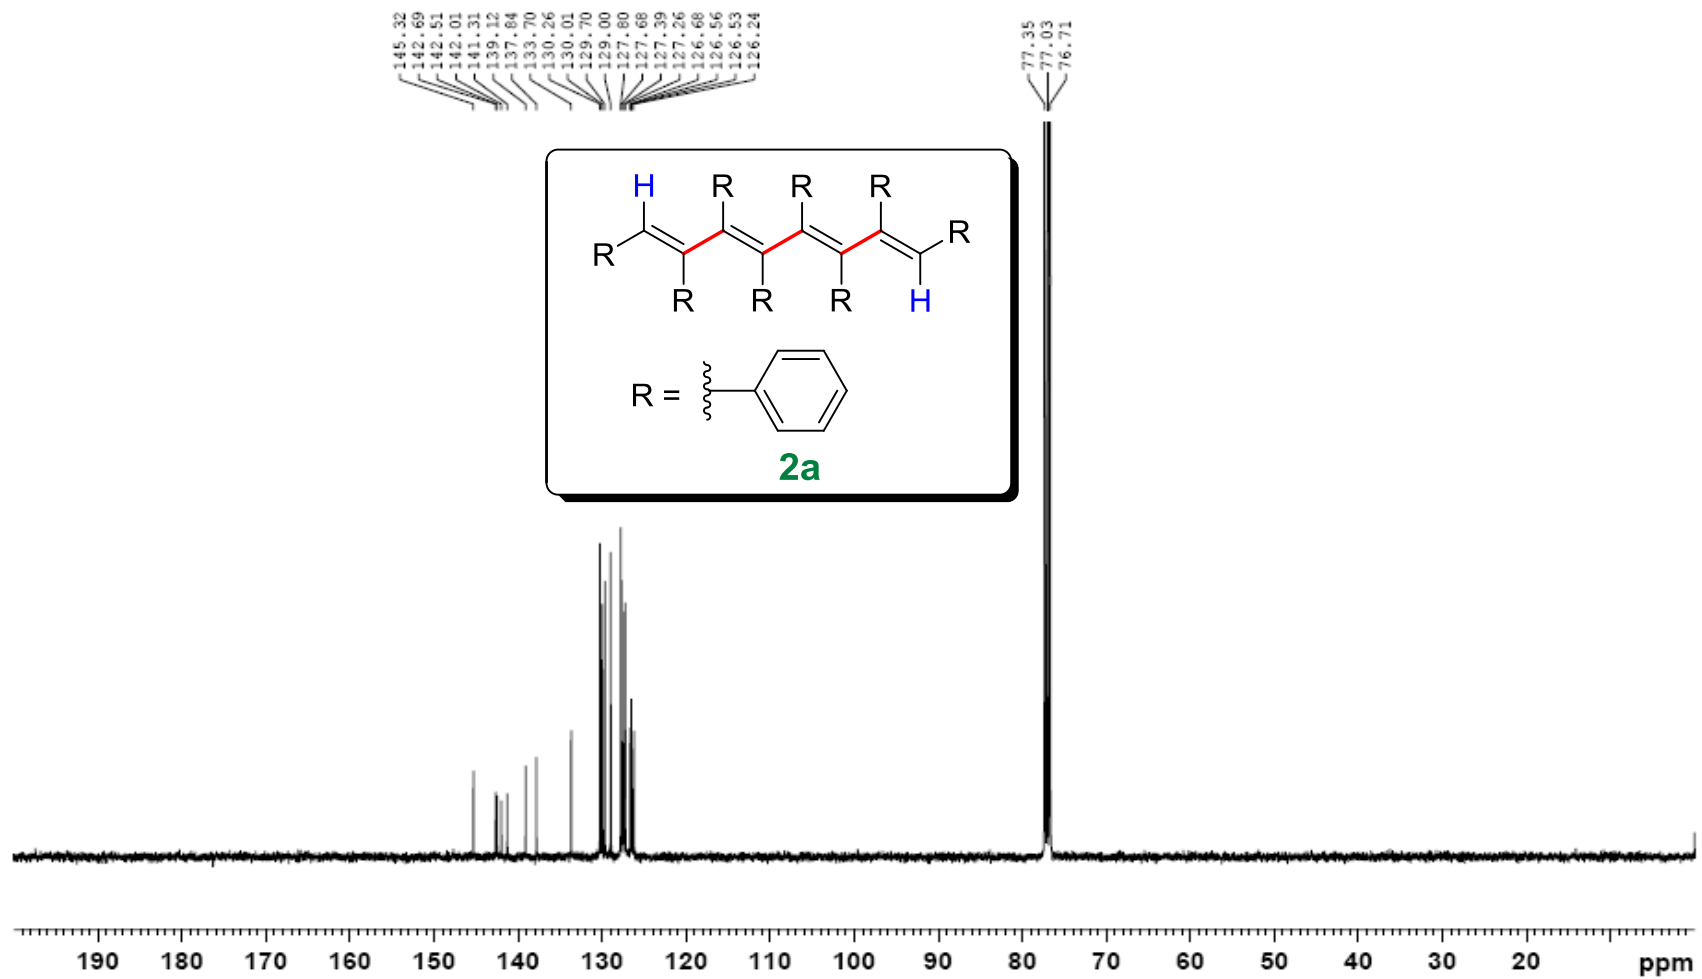

ZGY-140521-3-HNMR

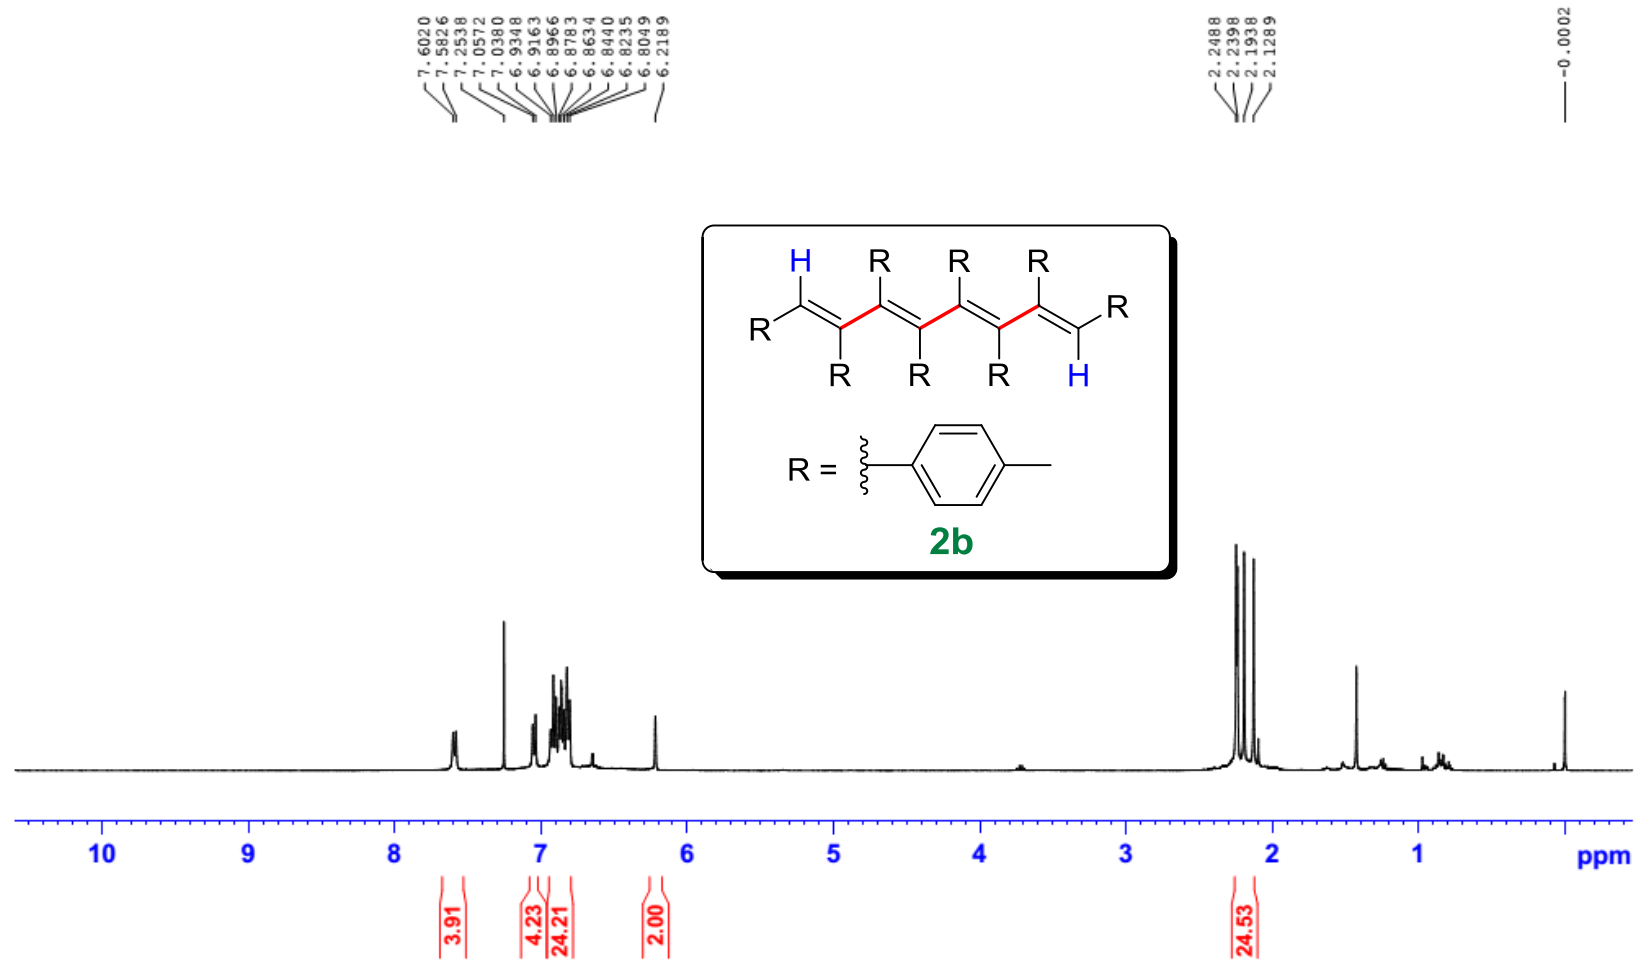

ZGY-140521-3-CNMR

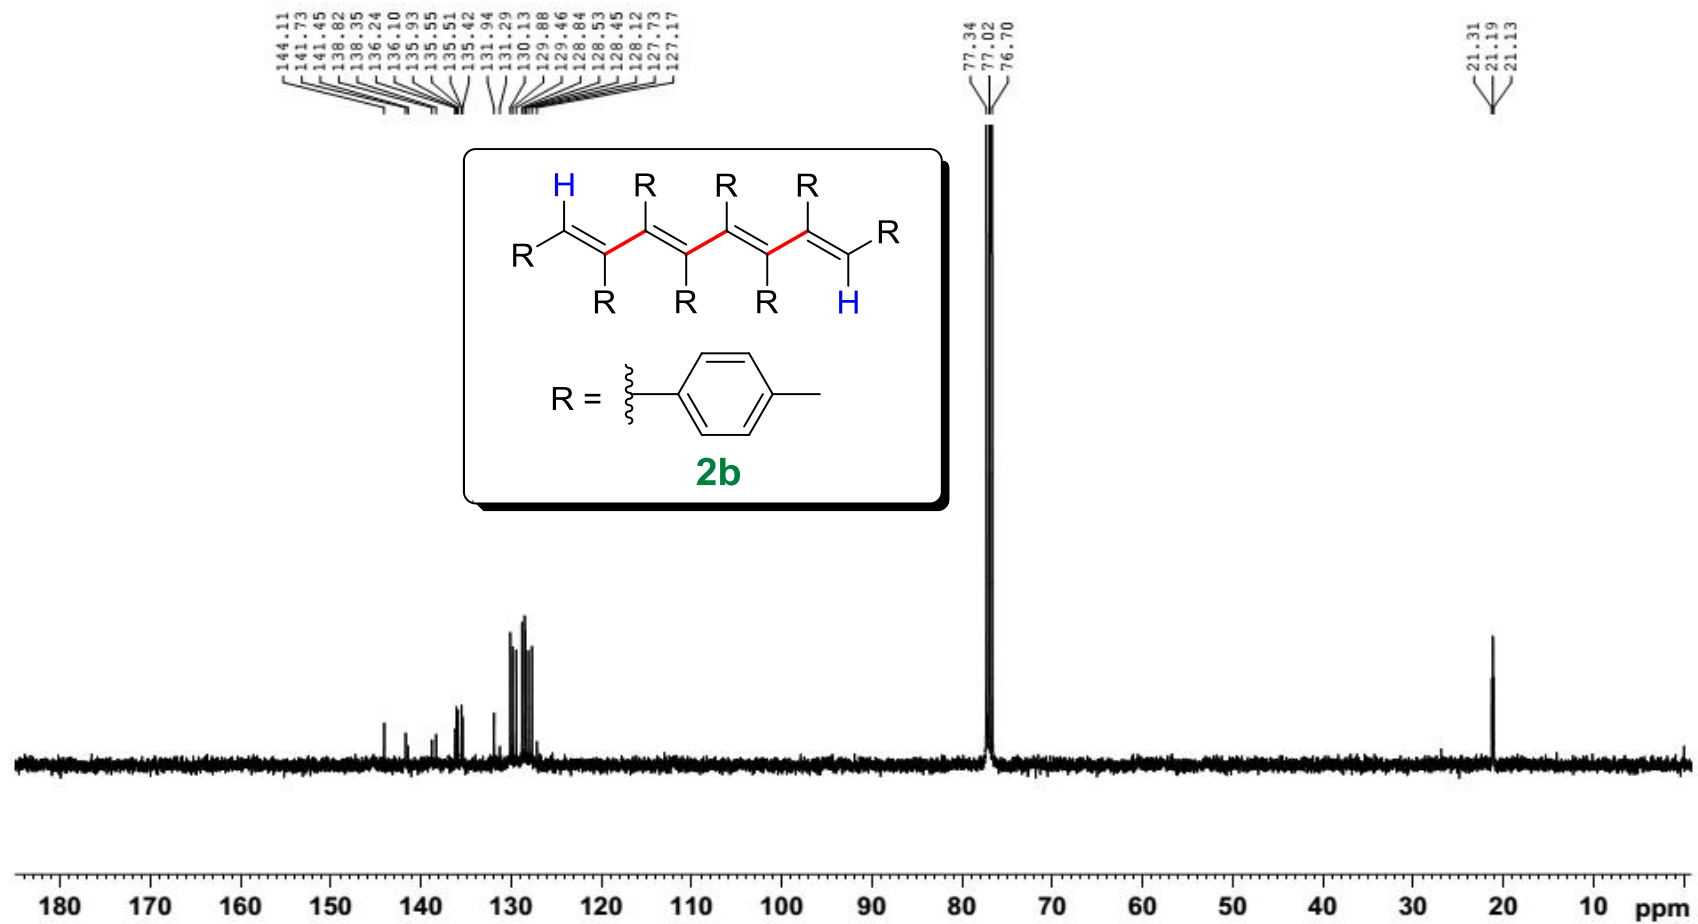

L40715-ZCY-4-HNMR (1)

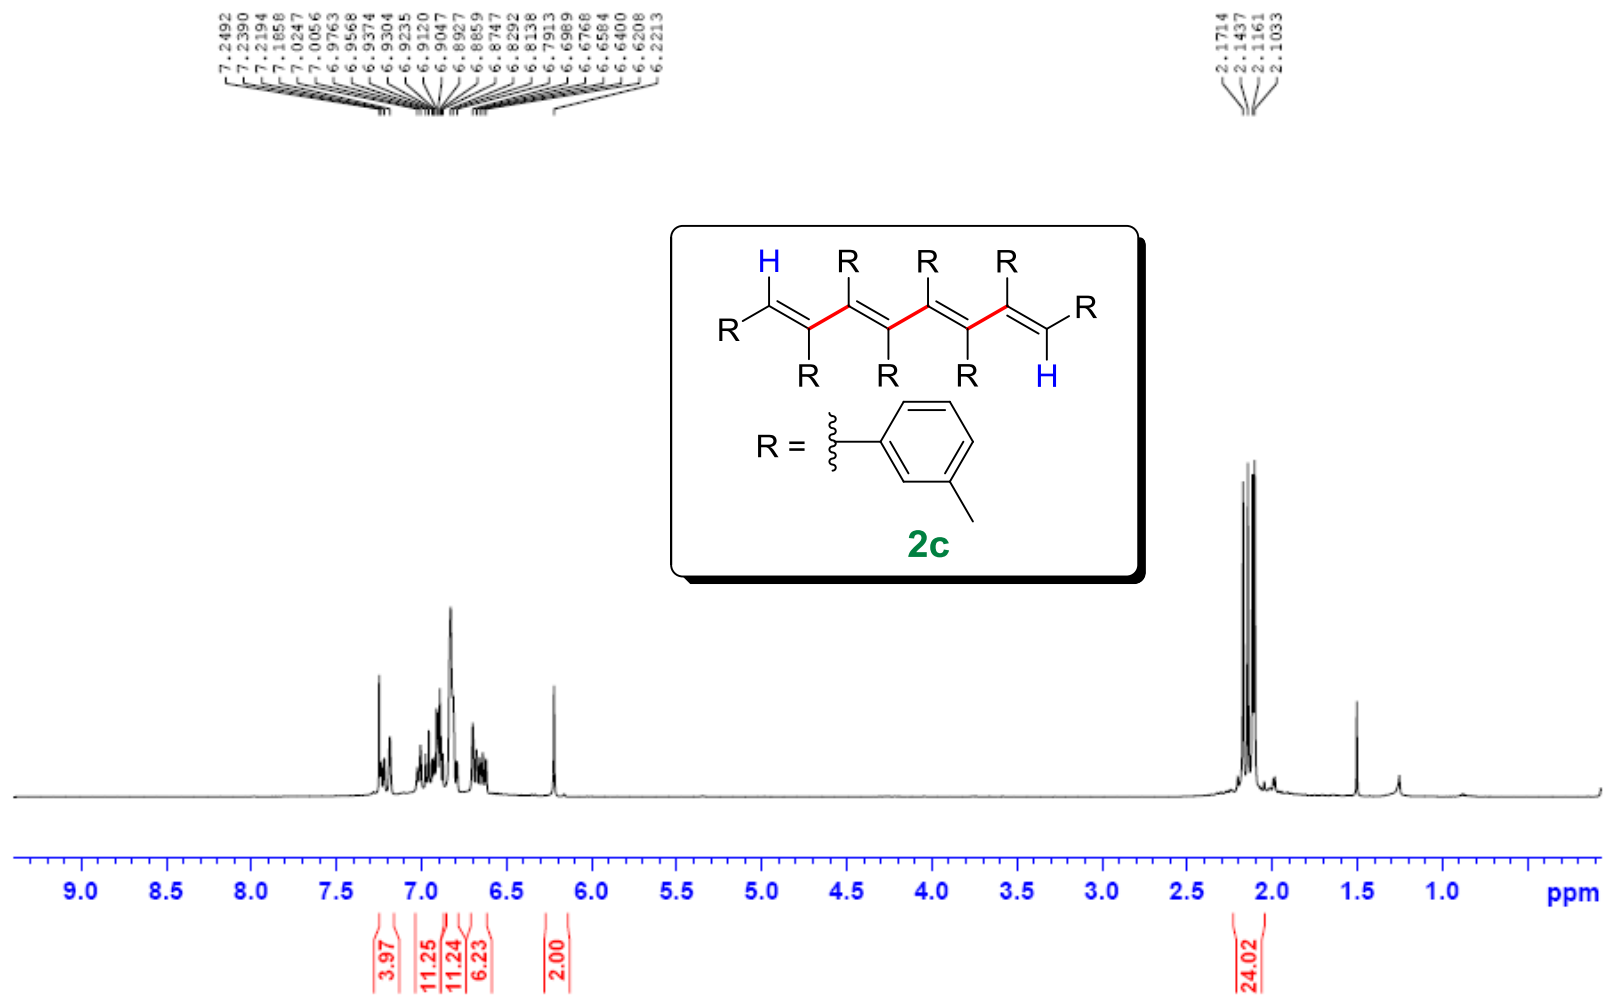

20140715-ZCY-4-CNMR (19)

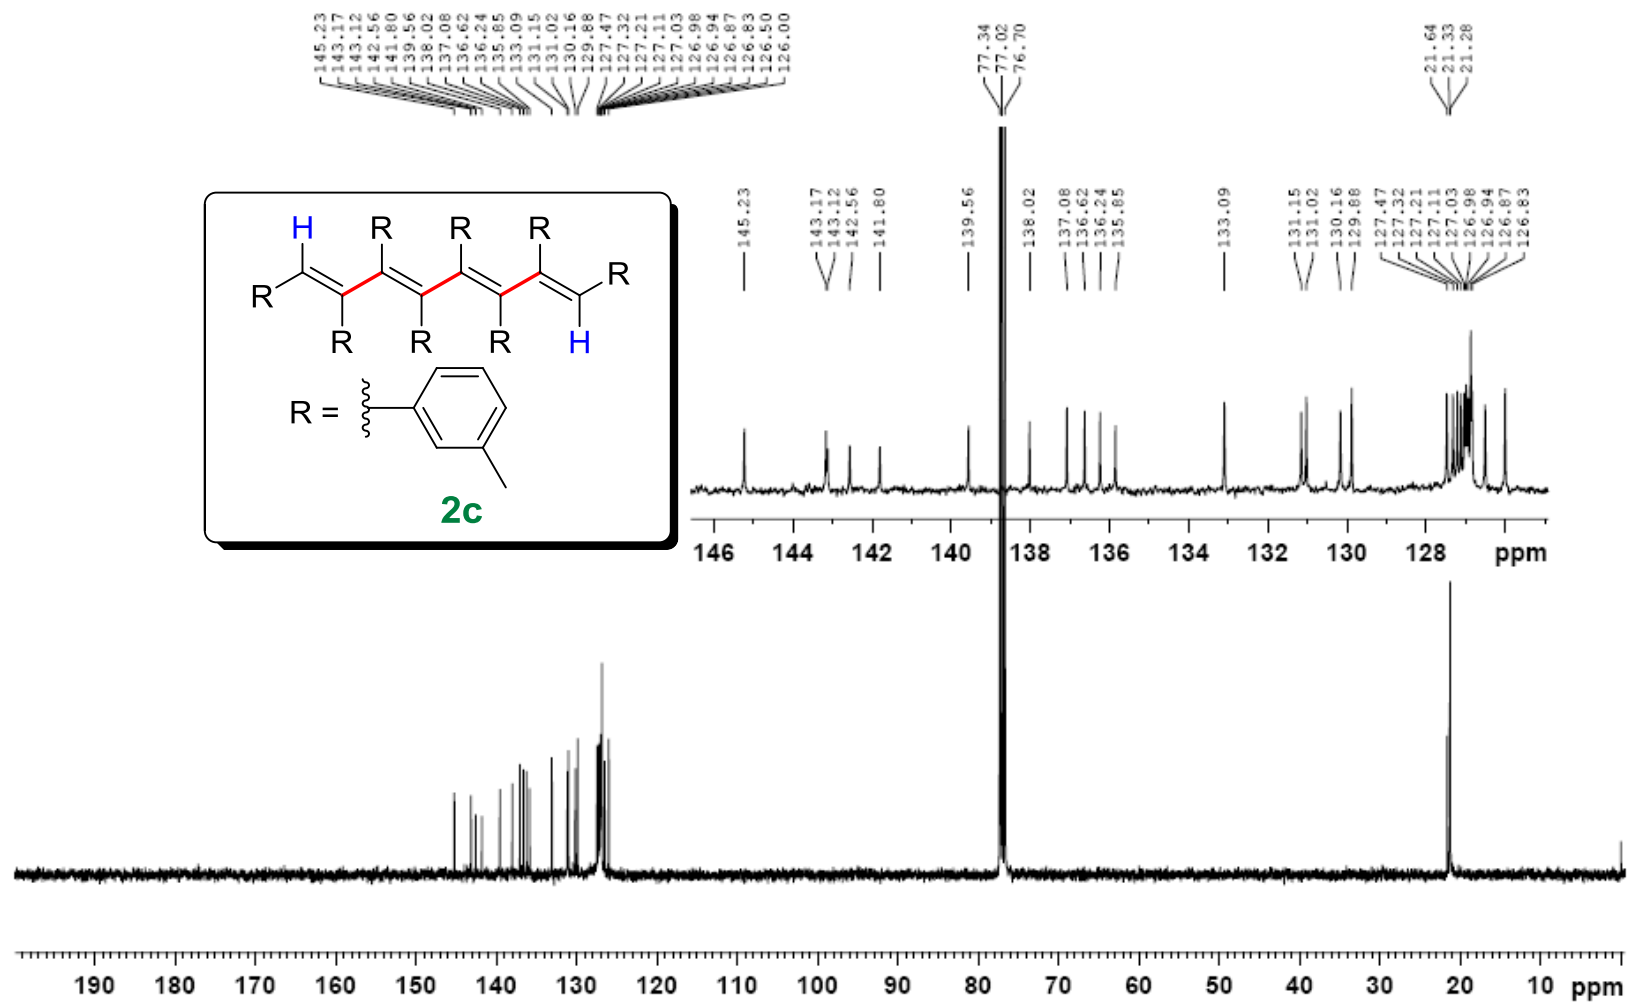

ZGY-140714-1-HNMR

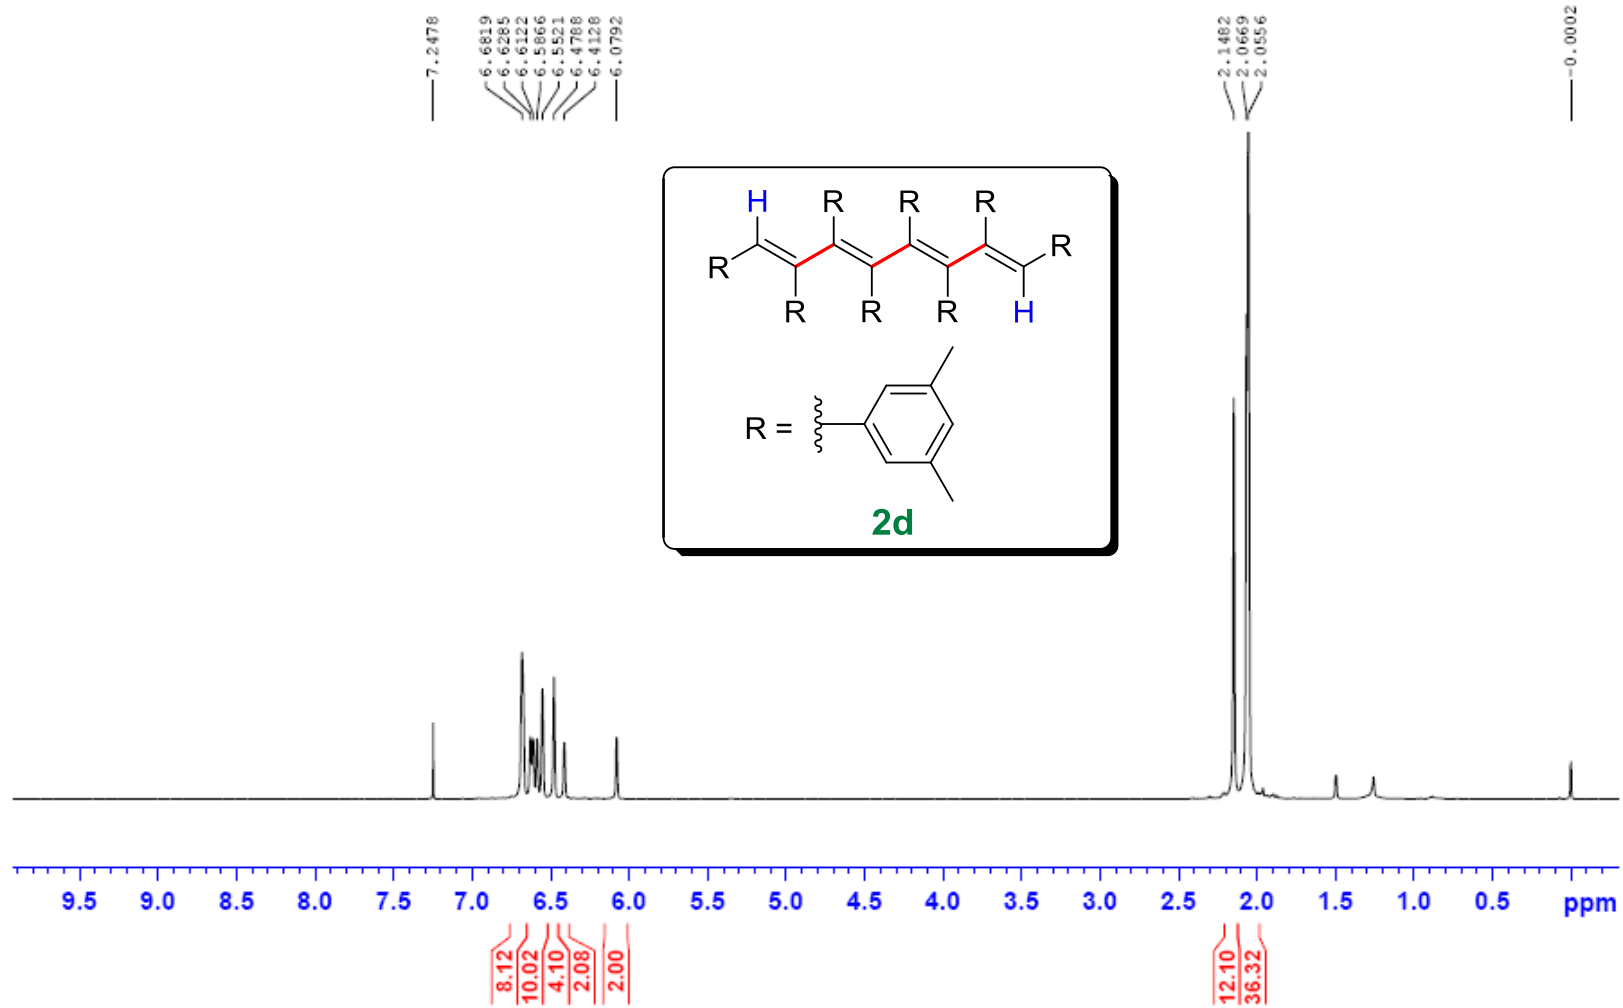

20140715-ZCY-6-CNMR (21)

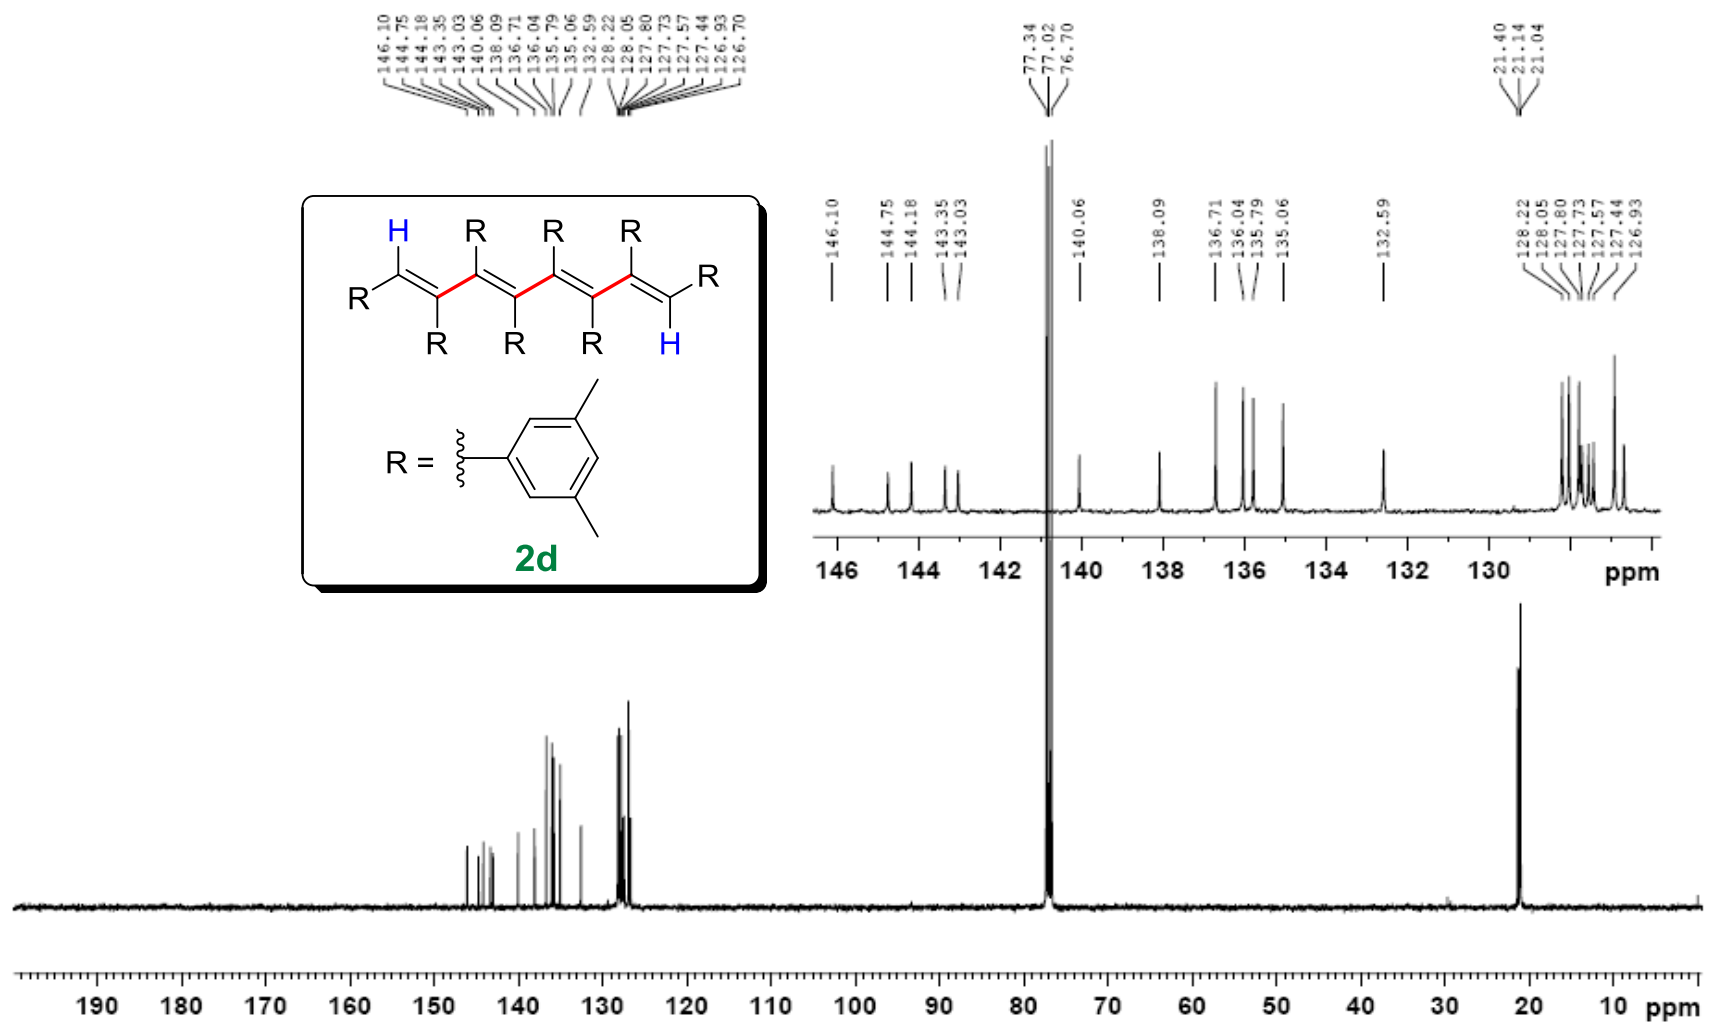

ZGY-140521-9-HNMR

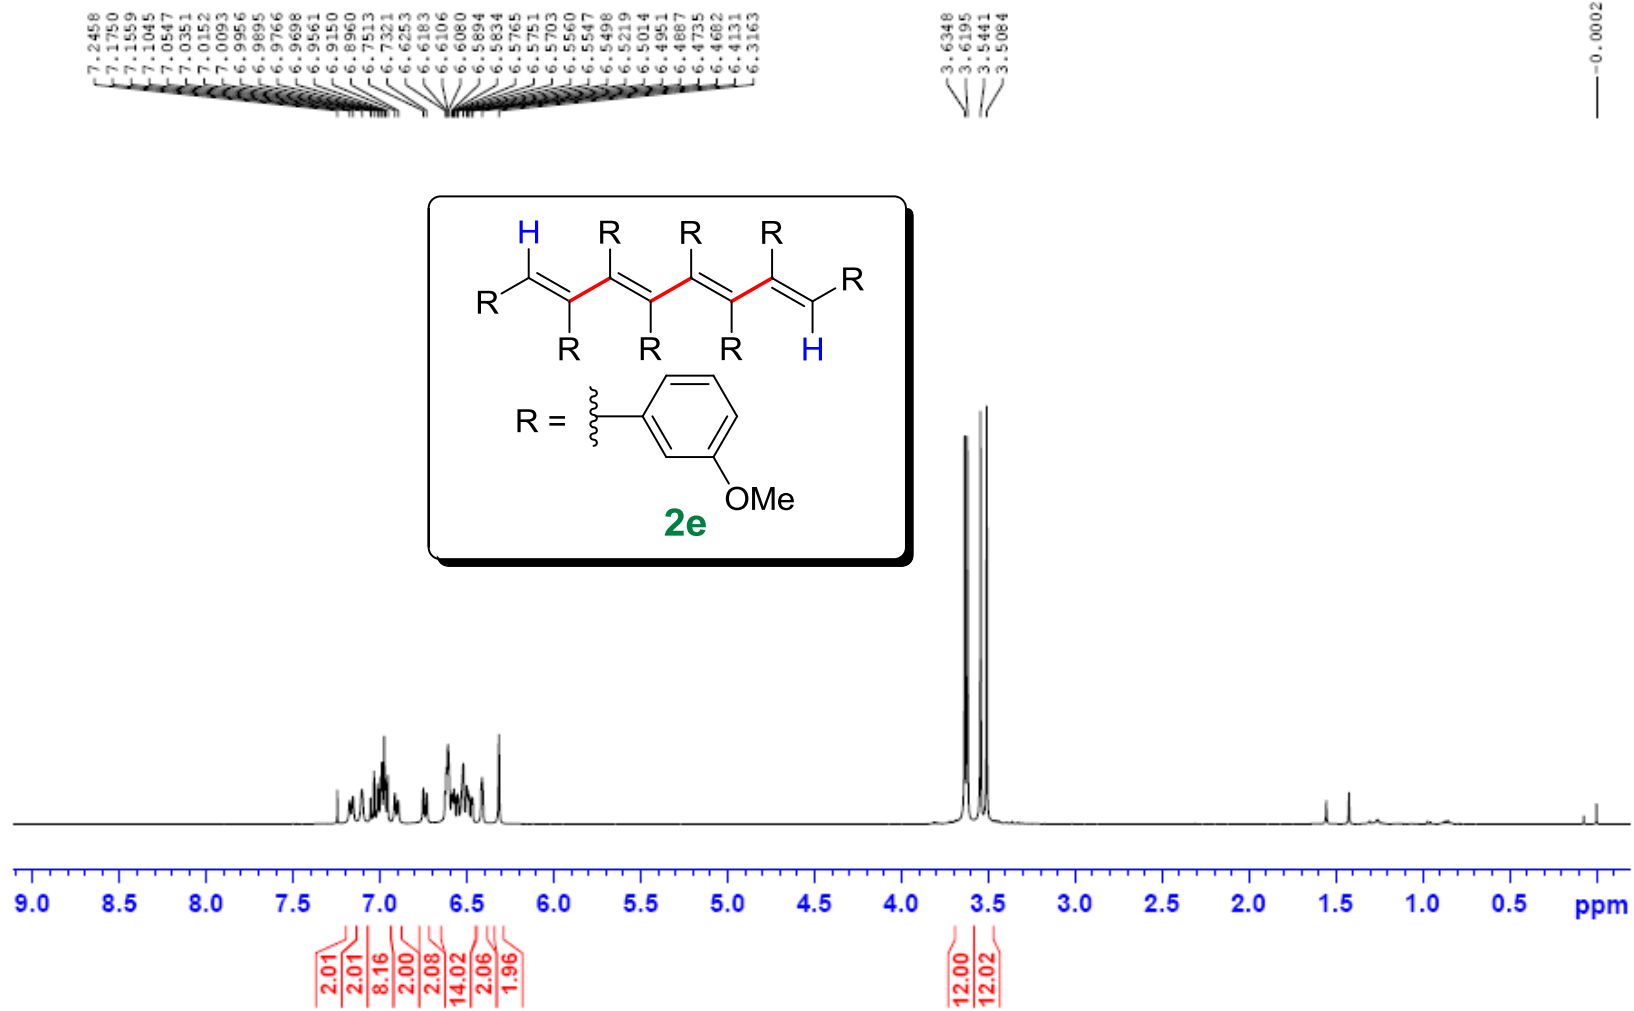



ZGY-140521-9-CNMR

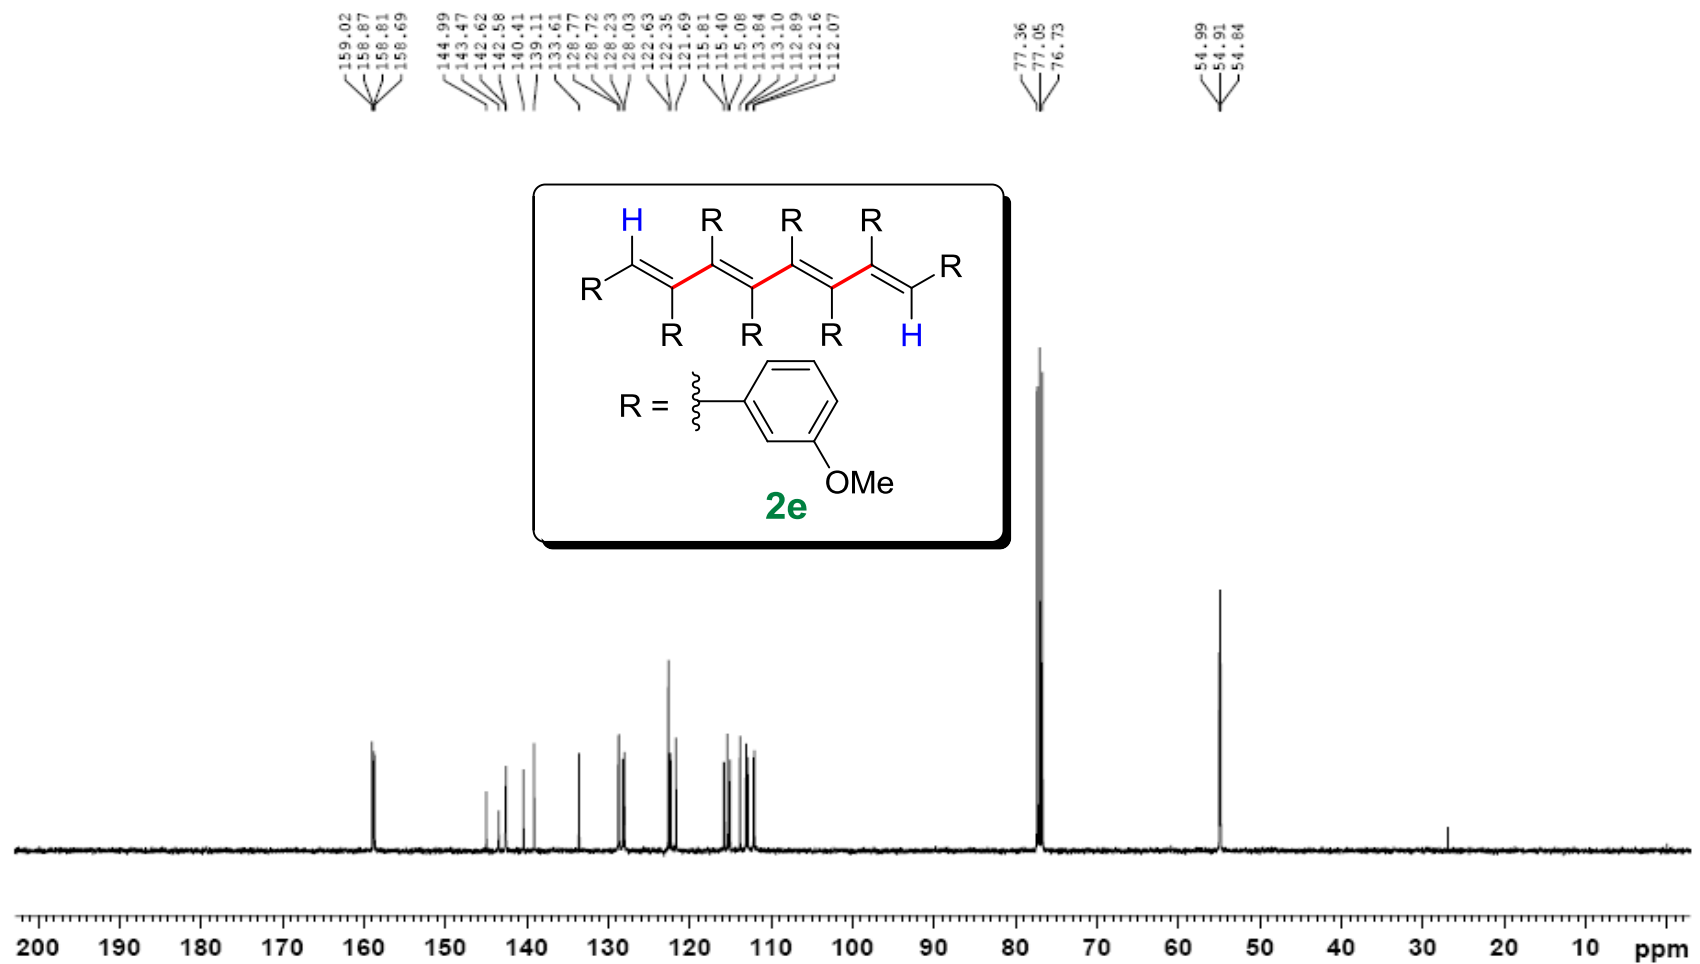

ZGY-140521-7-HNMR

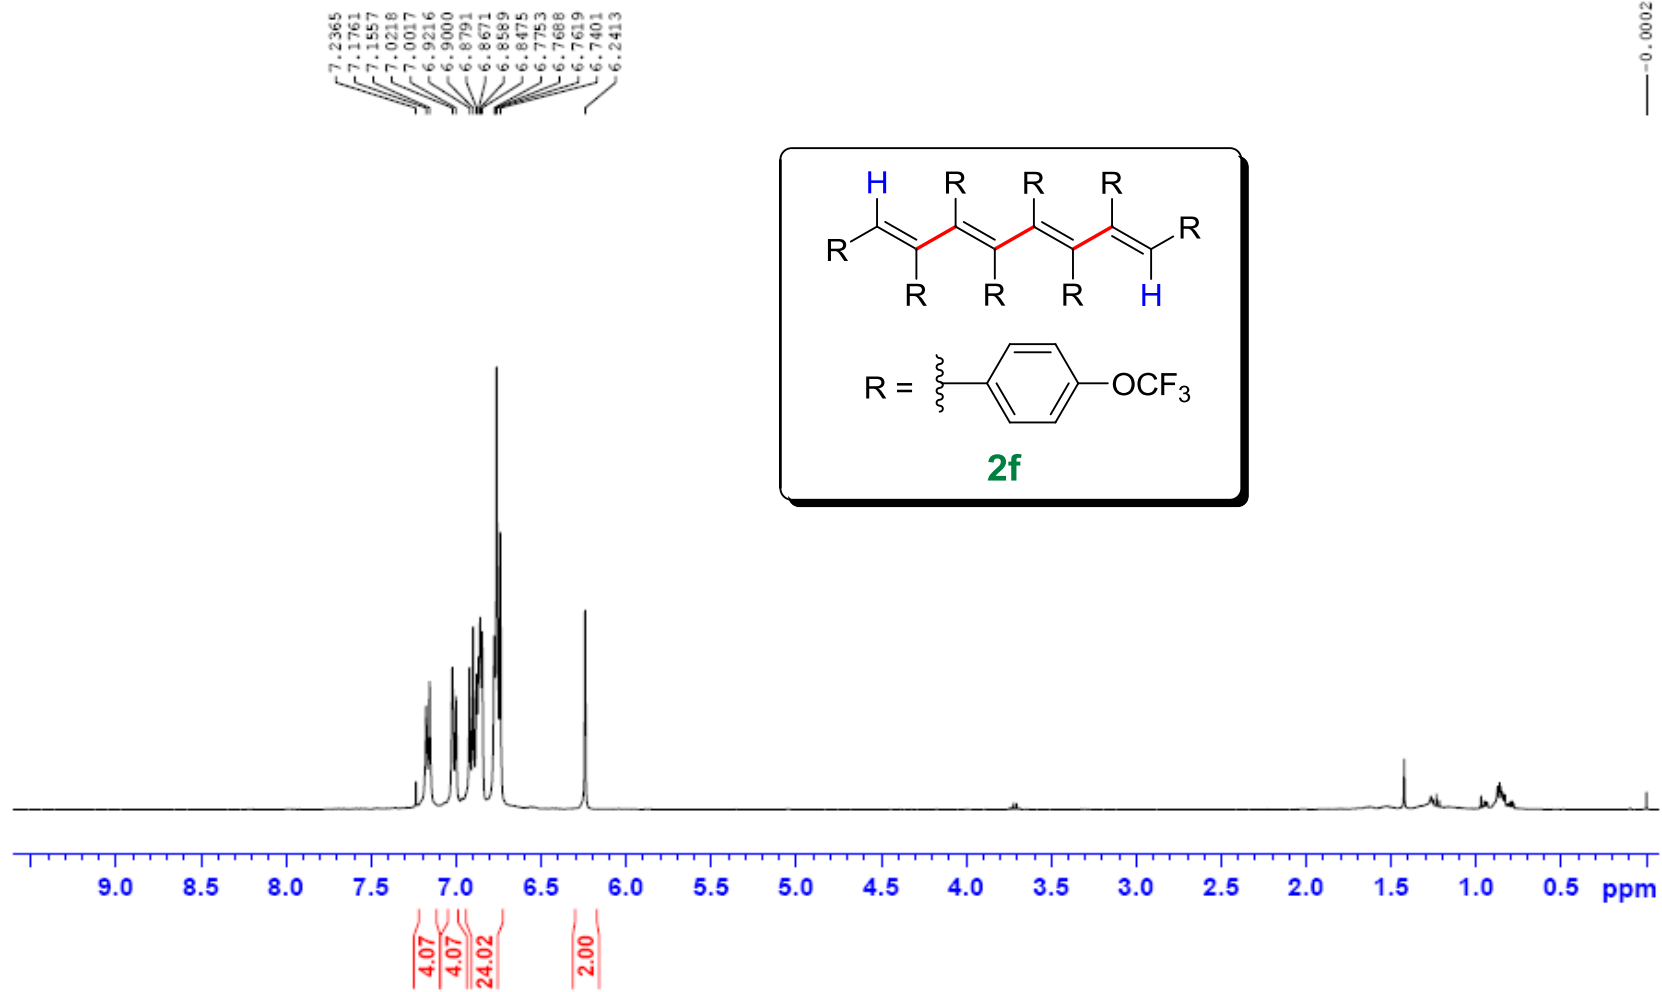

ZGY-140521-7-CNMR

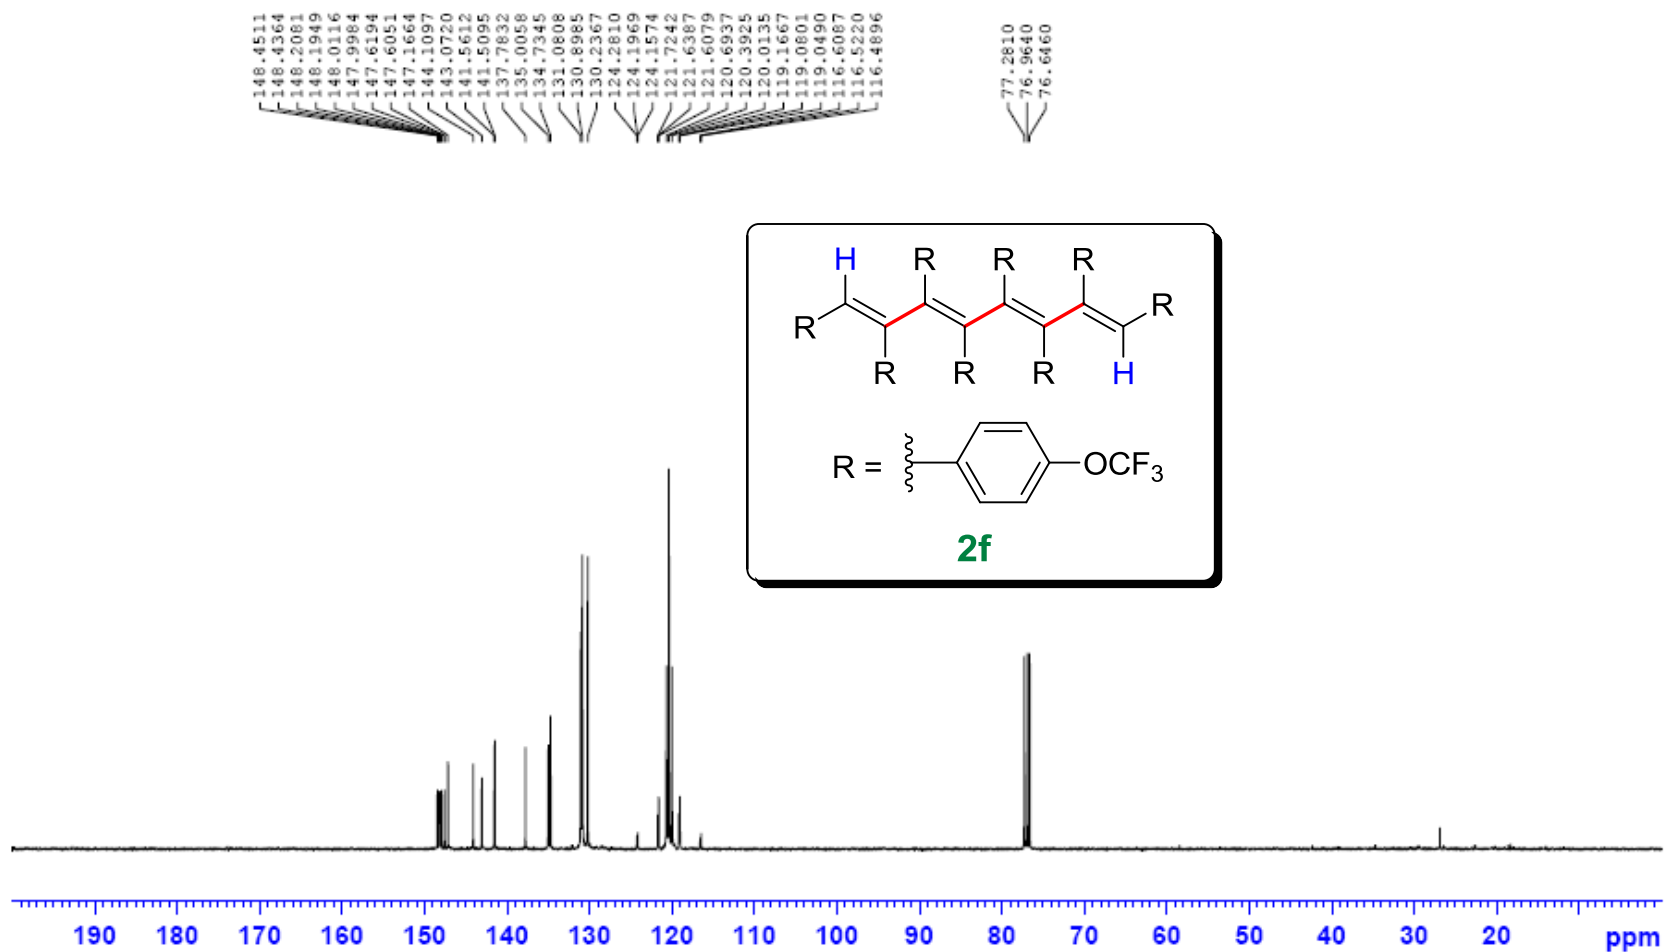

ZGY-140521-7-FNMR

-57.9704  
-58.0575  
-58.1700

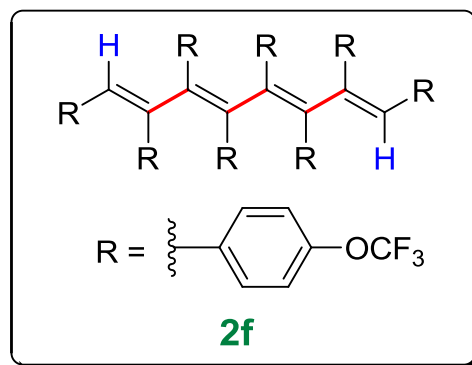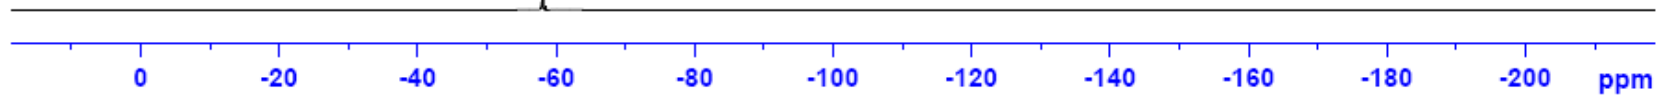

L40617-ZCY-4-HNMR (1)

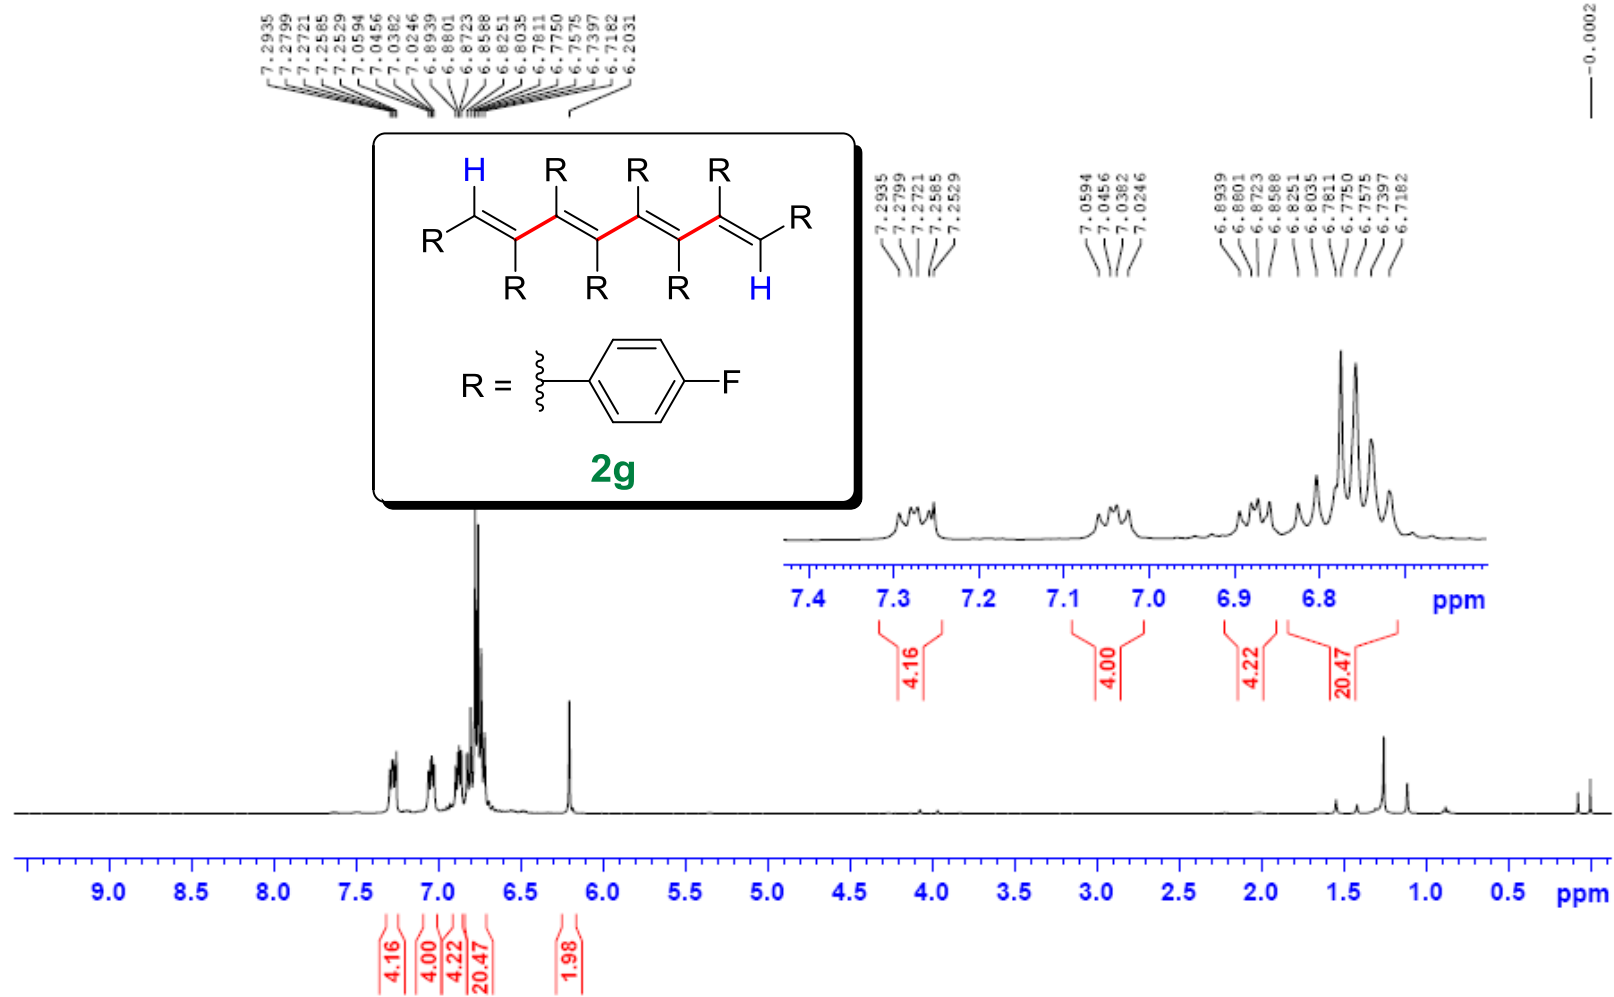

— 0.0002

20140617-ZCY-4-CNMR (1')

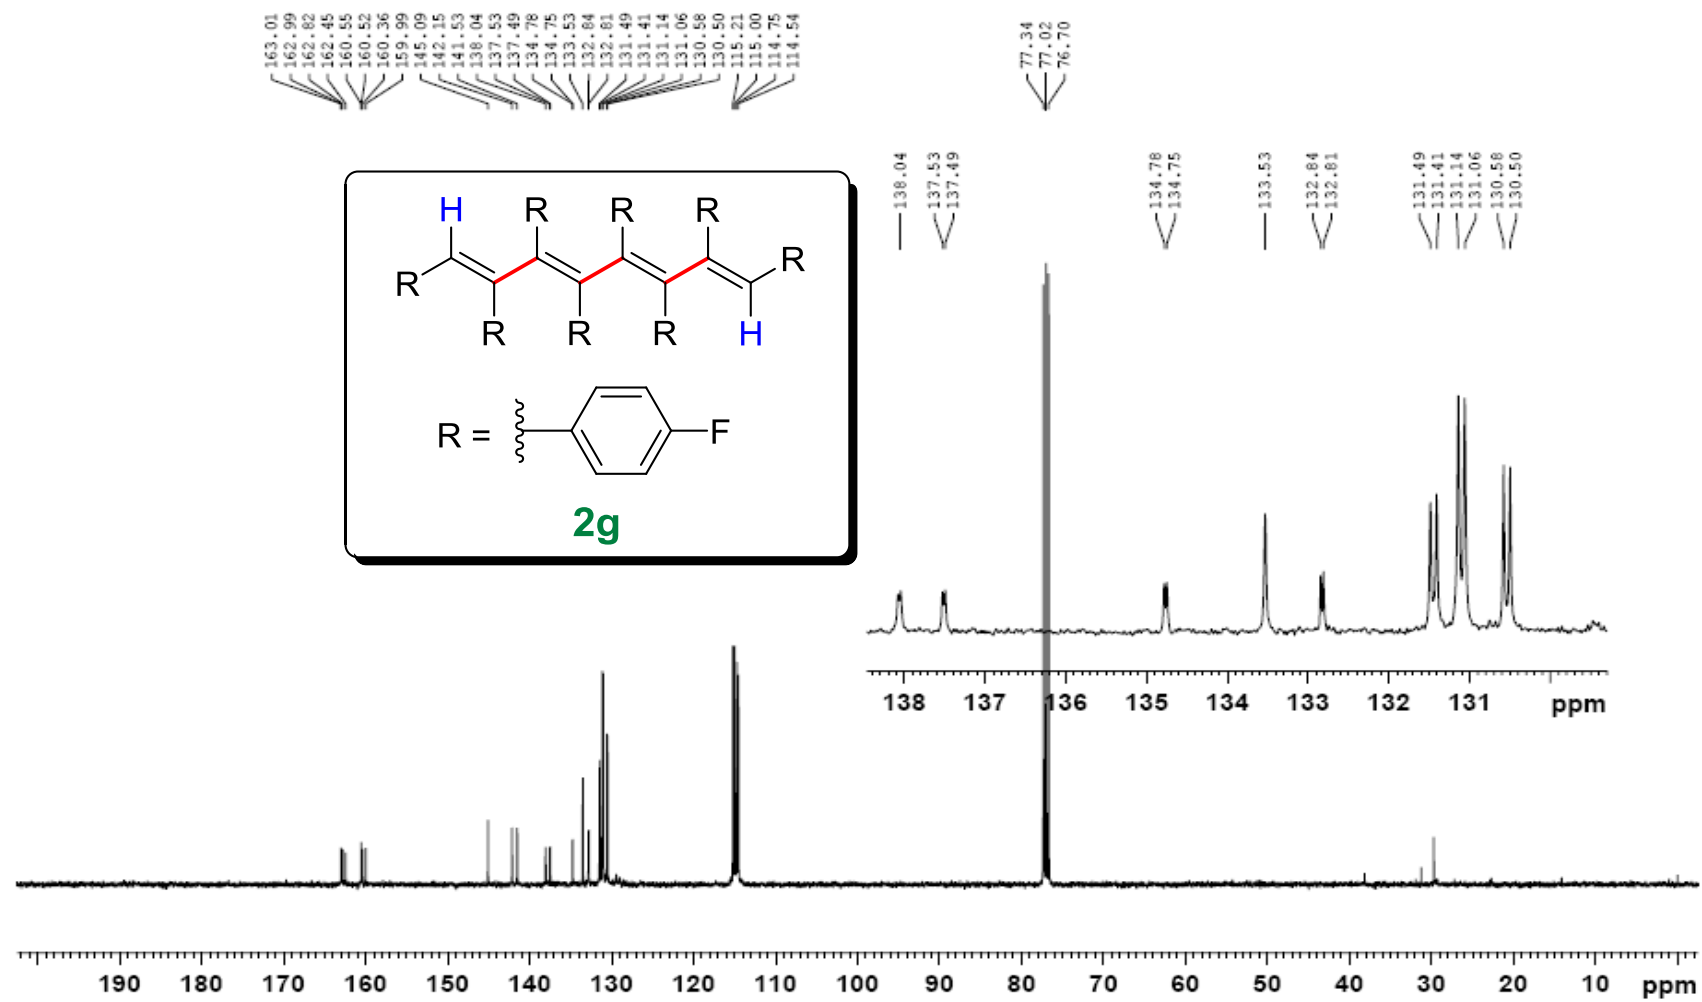

ZGY-140526-1-FNMR

114.0228  
114.0523  
114.1607  
114.7692

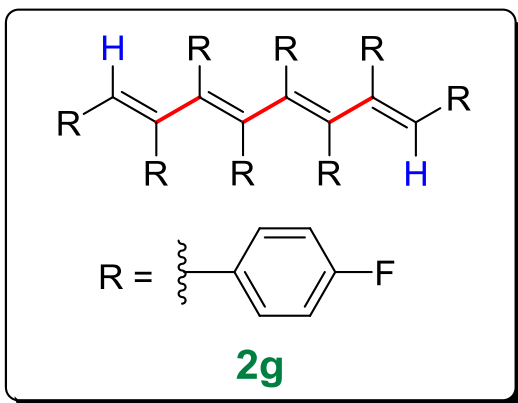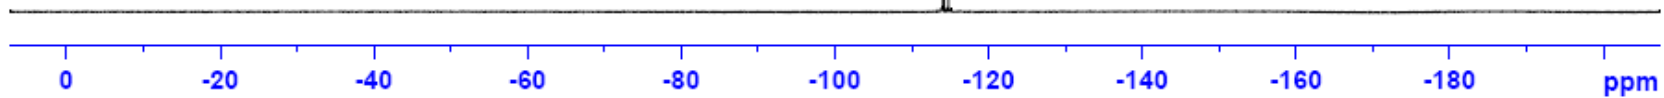

ZGY-140716-1-HNMR

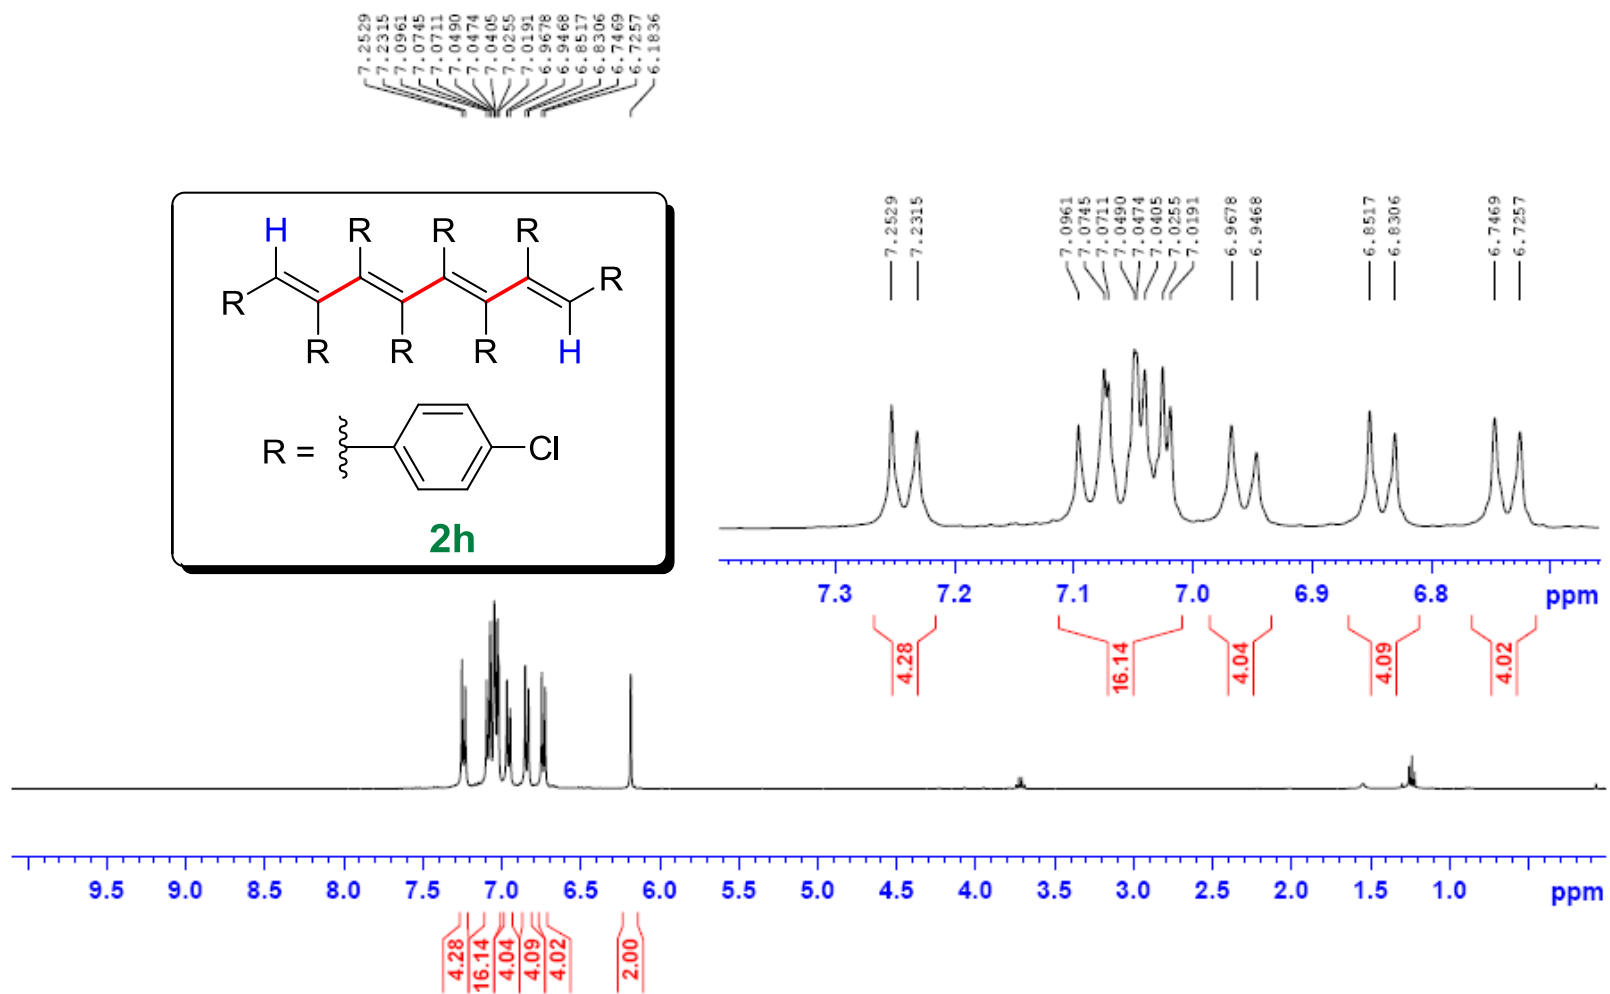



ZGY-140716-1-CNMR

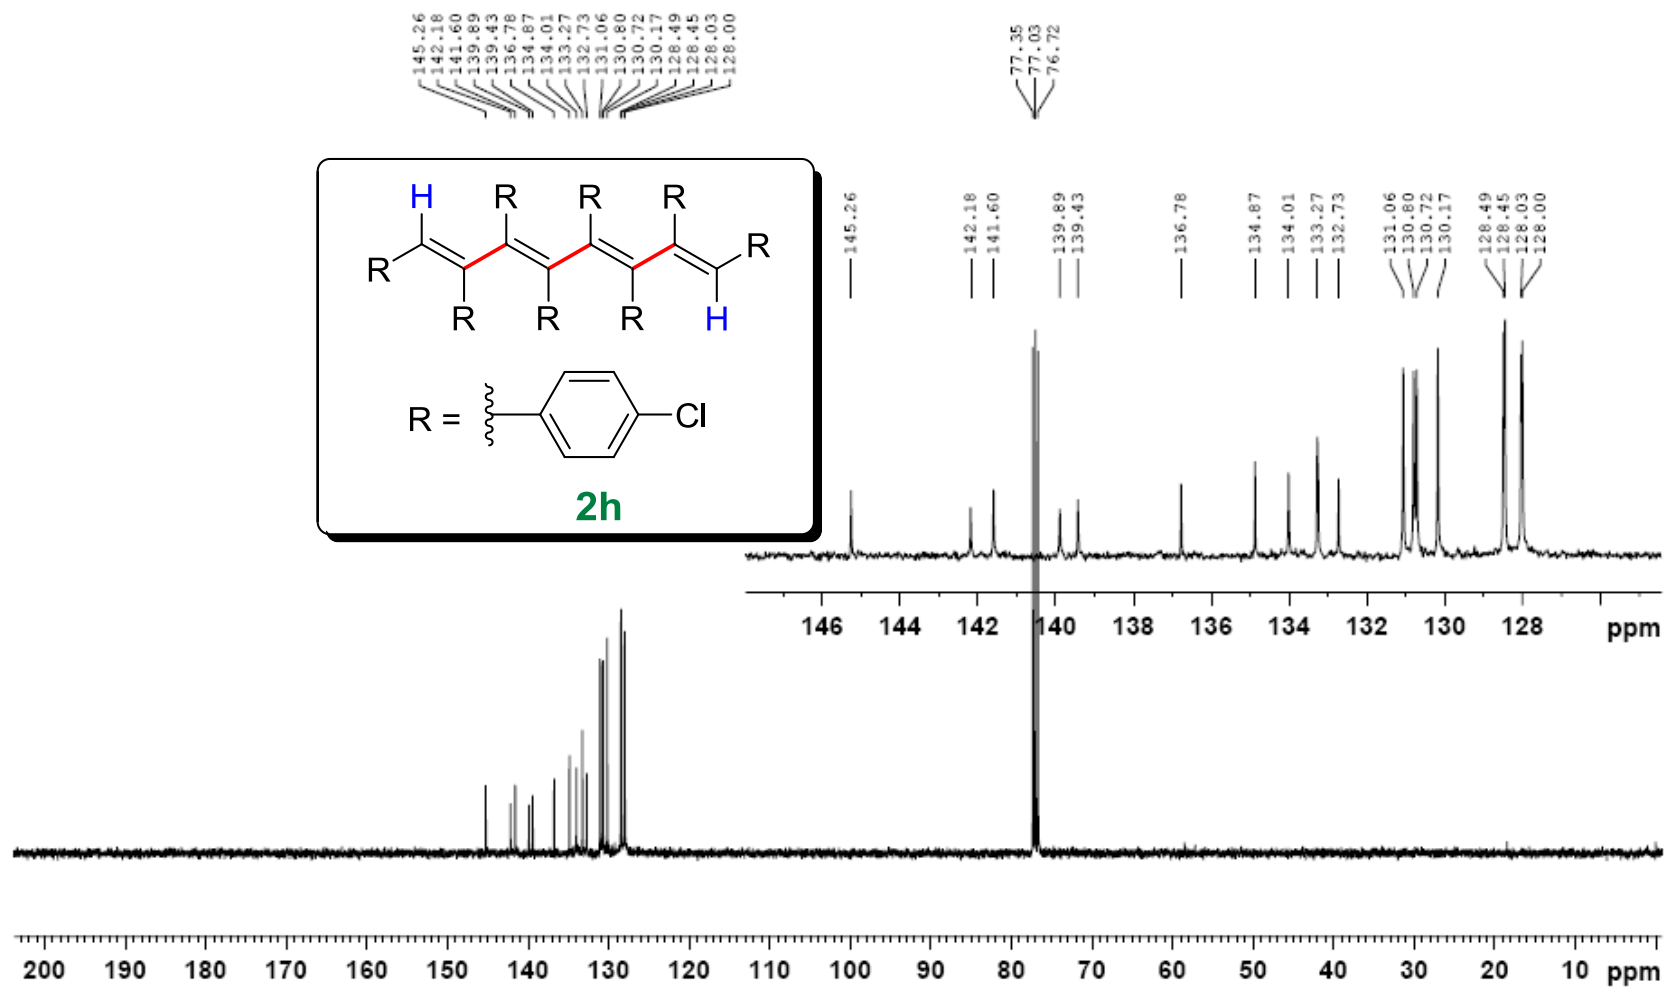

L40722-ZCY-6-HNMR (2)

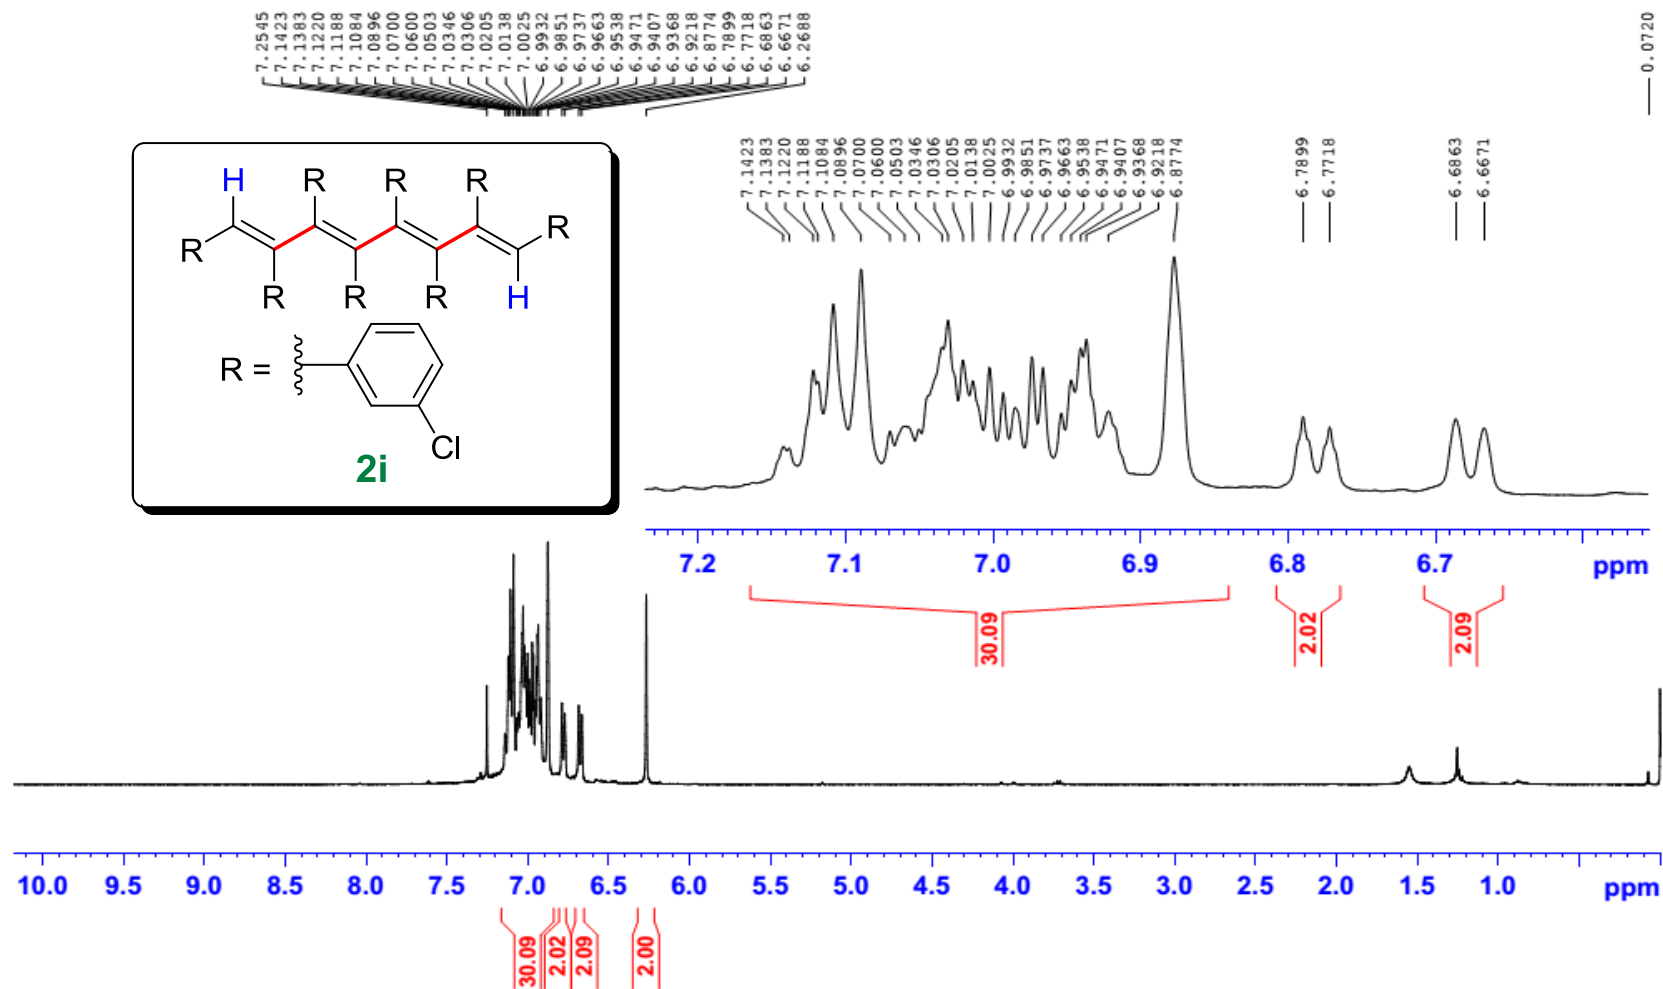

ZGY-140716-2-CNMR

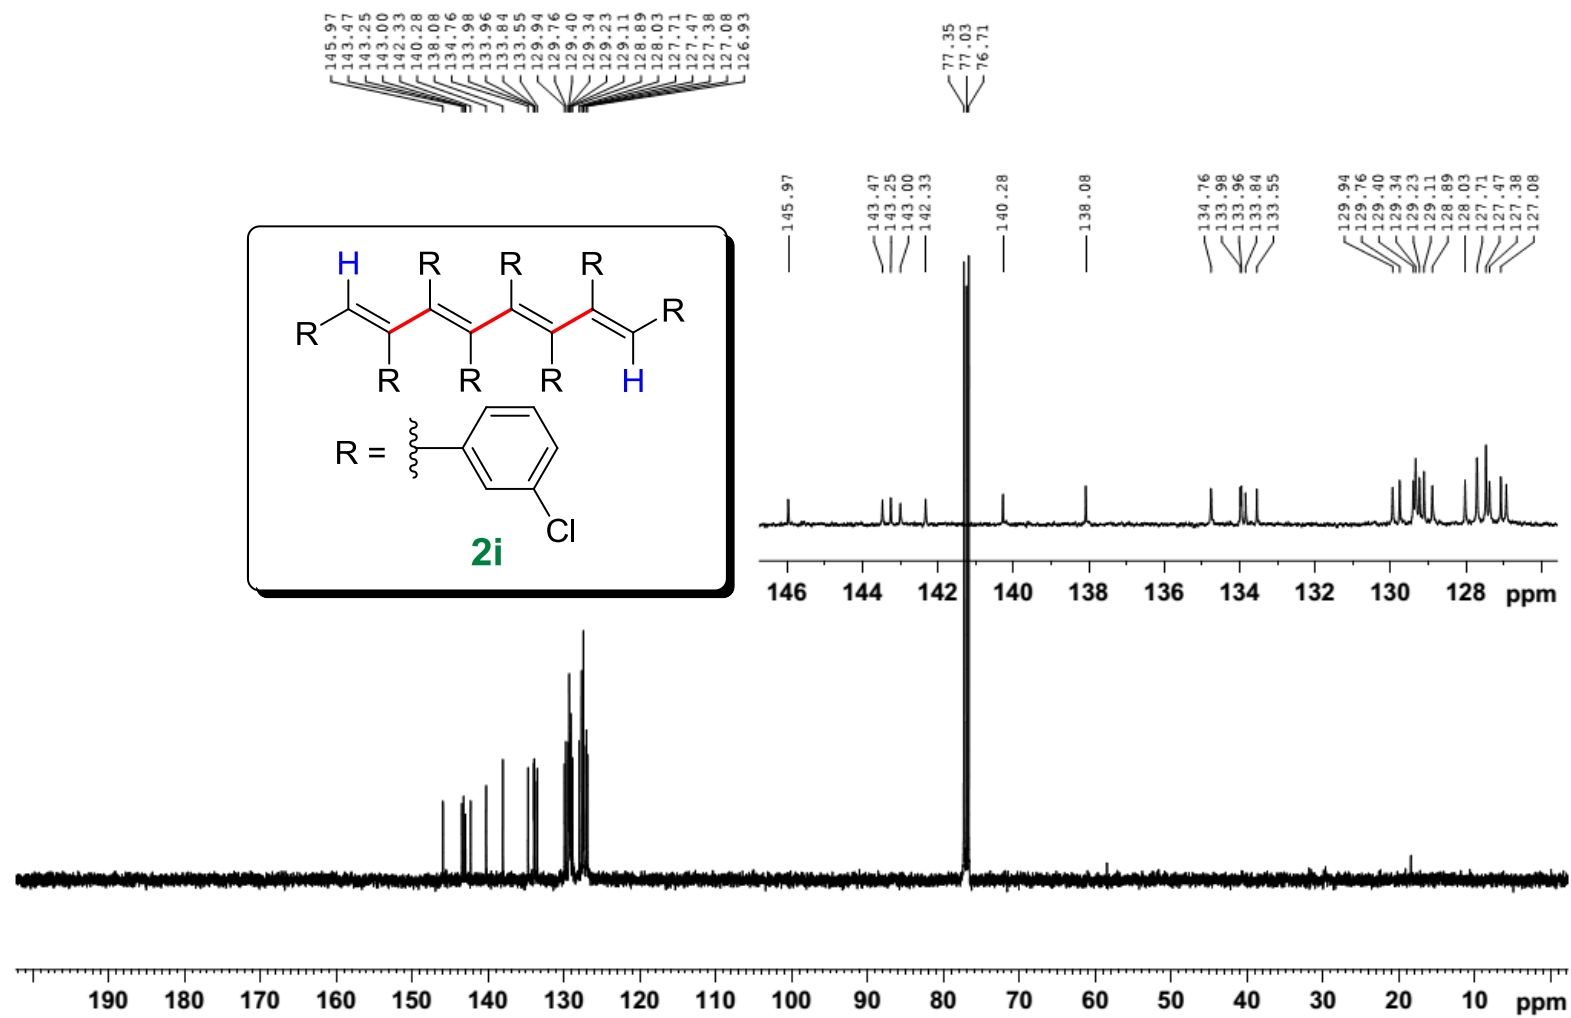

L40715-ZCY-1-HNMR (1

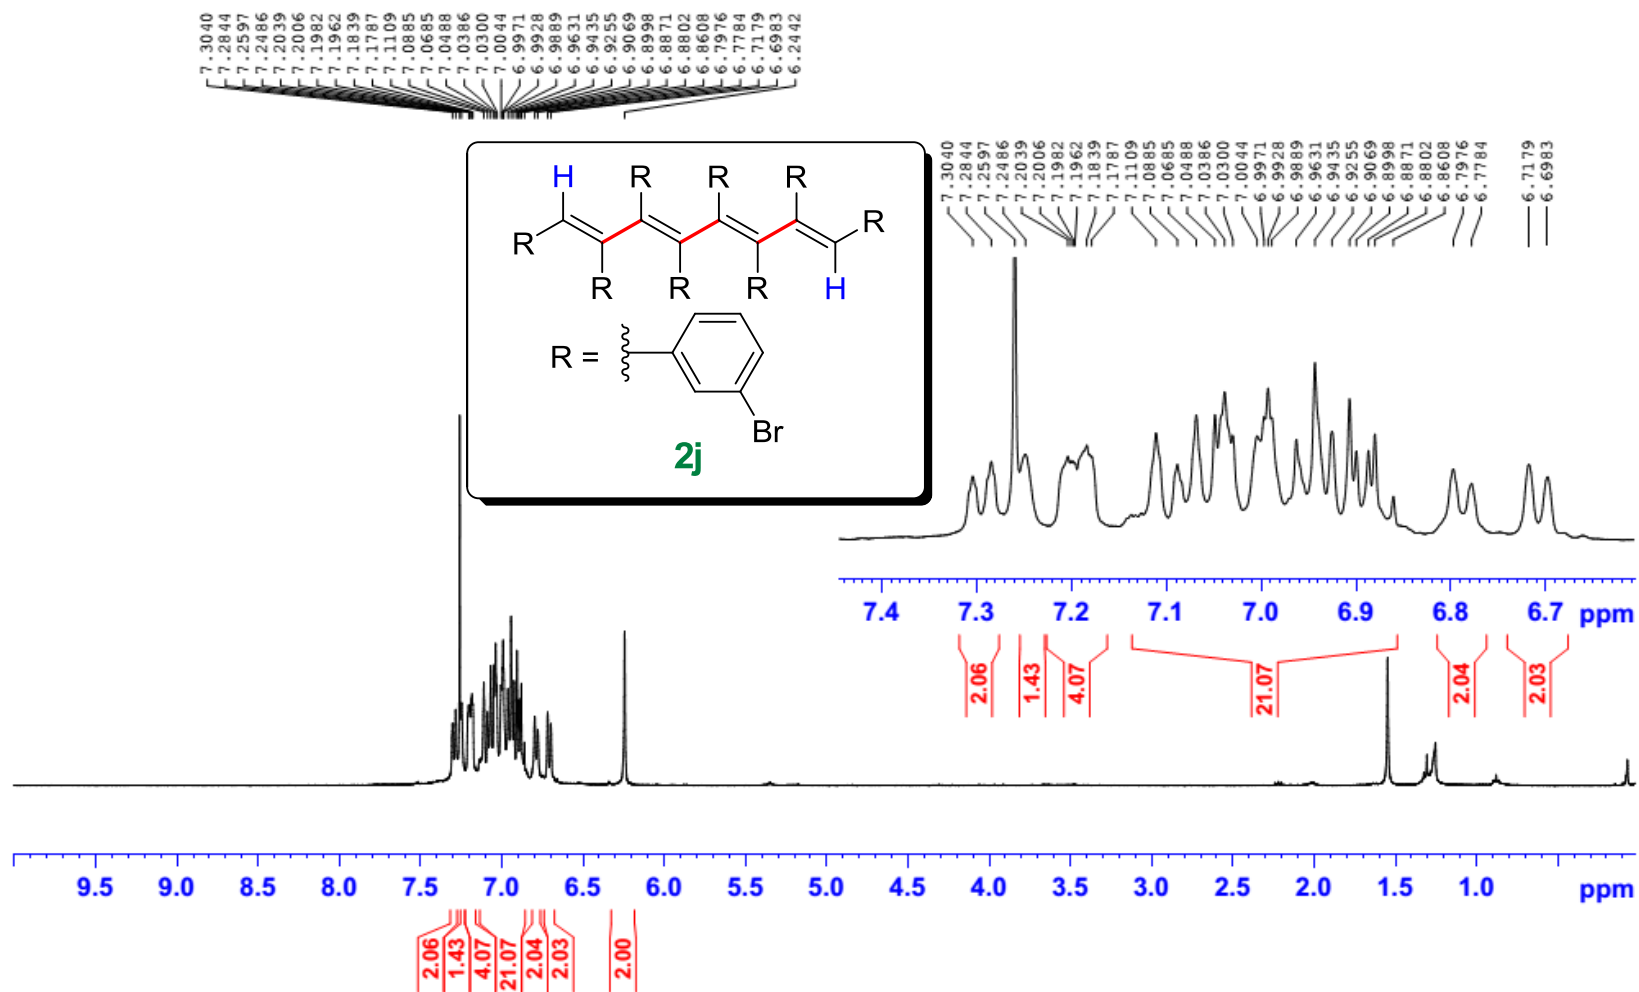

20140715-ZCY-1-CNMR (13)

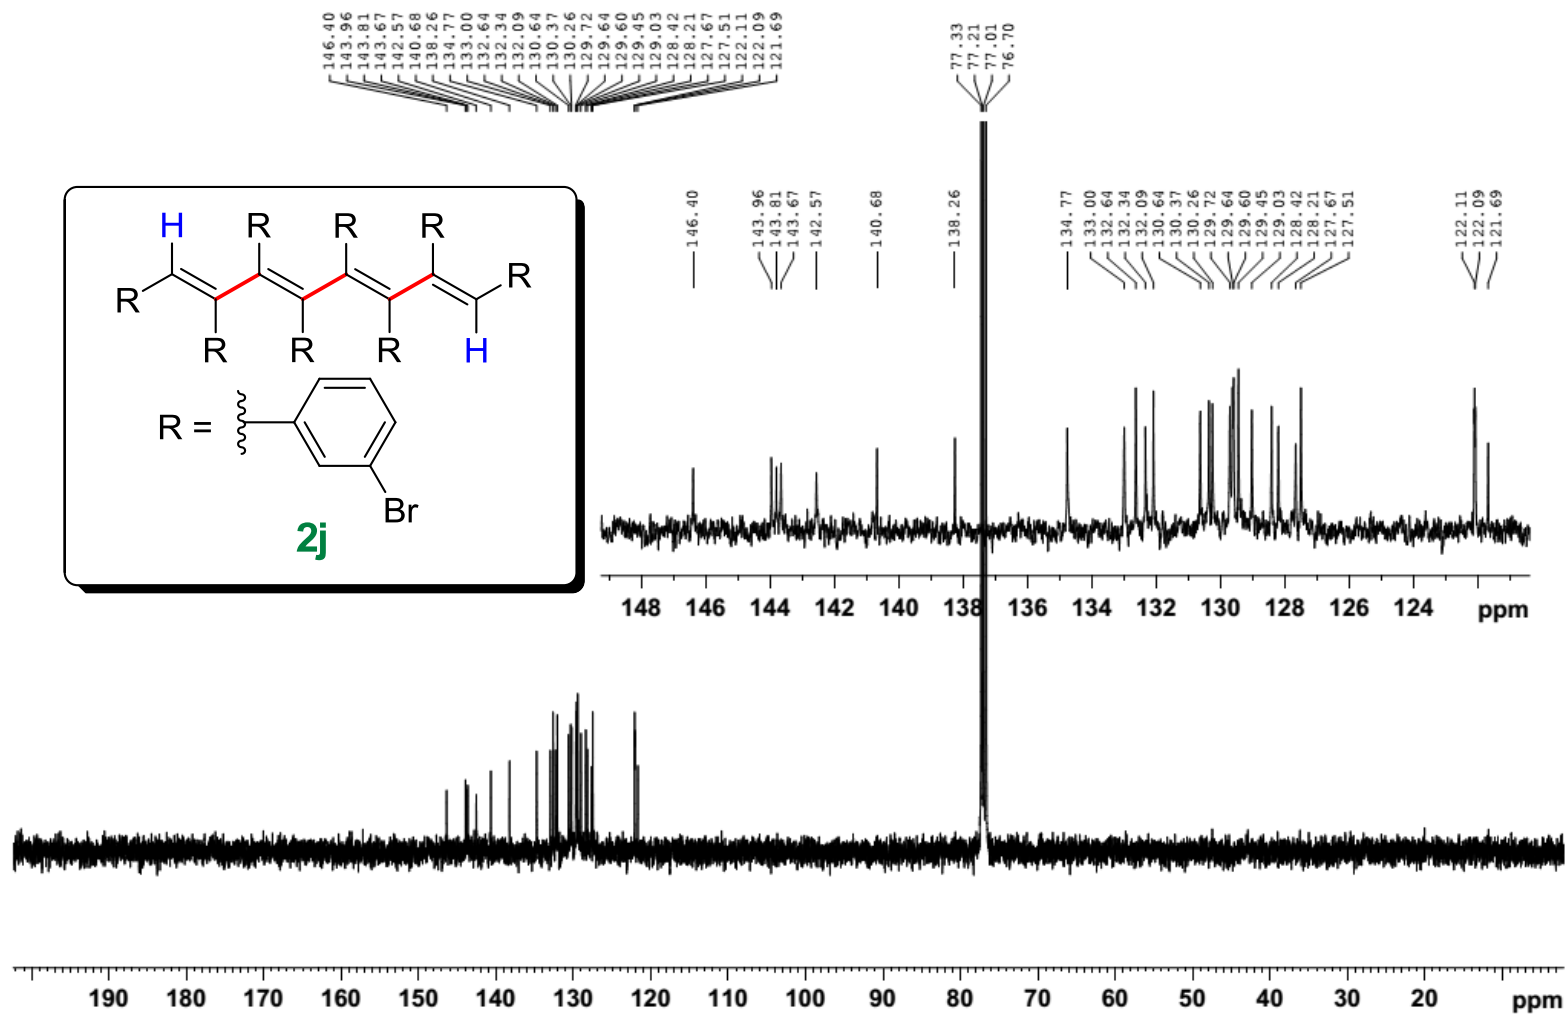

ZGY-140714-3-HNMR

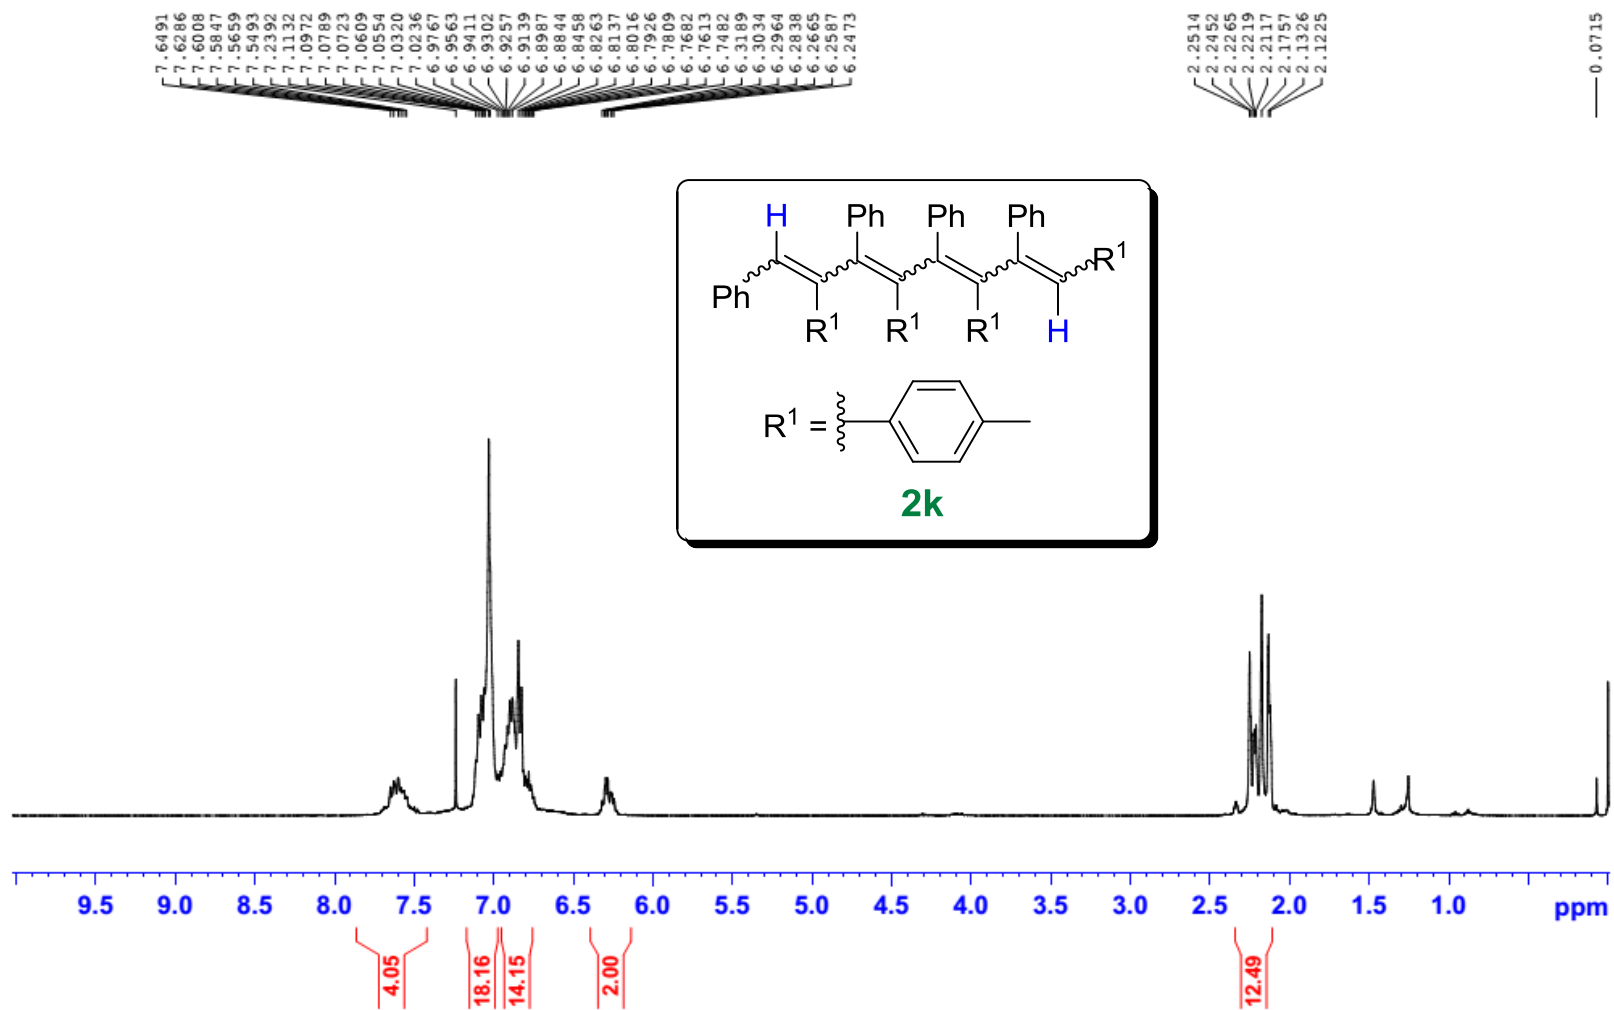

20140715-ZCY-5-CNMR (20)

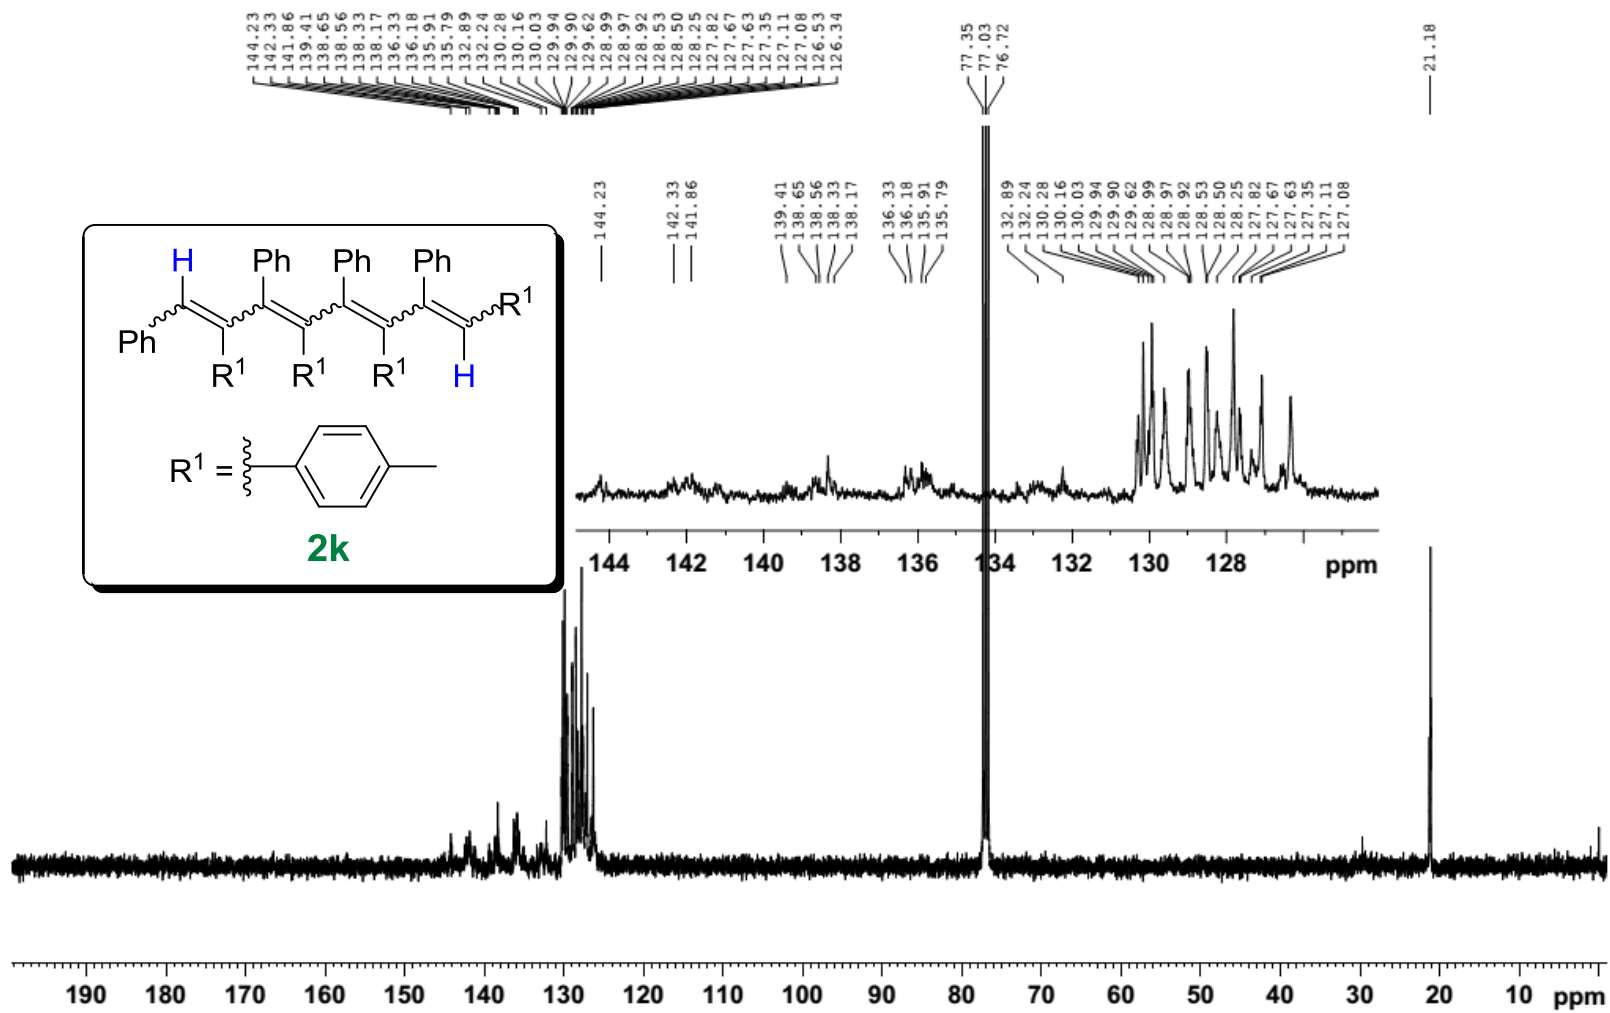

L40722-ZCY-4-HNMR (2

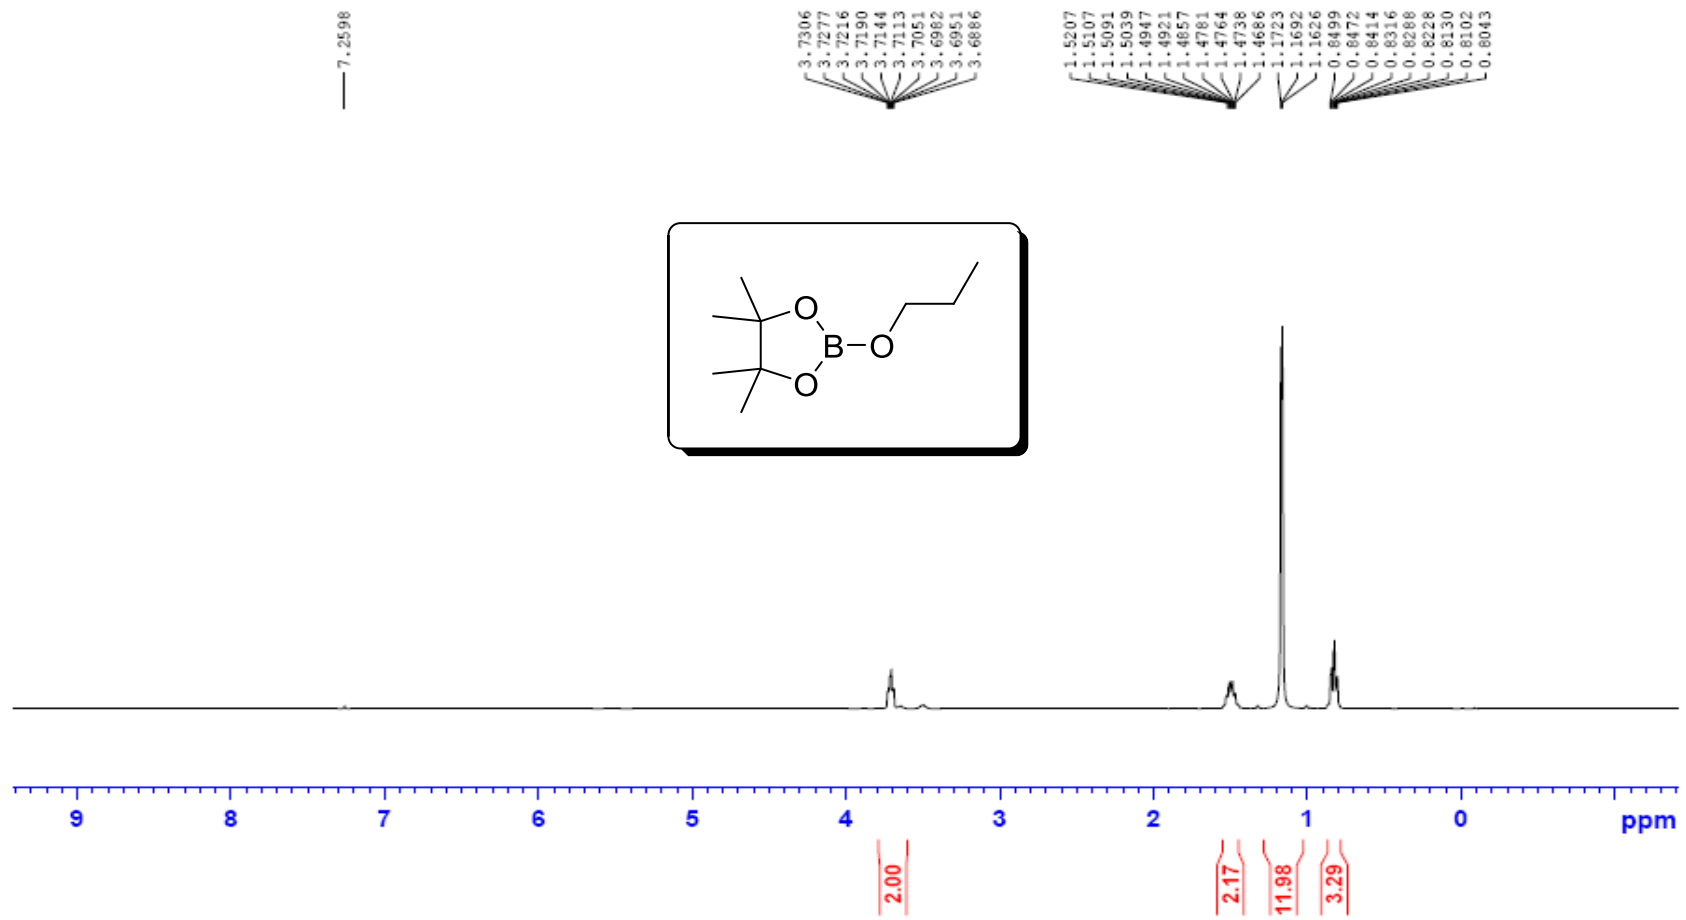



20140722-ZCY-4-CNMR (26)

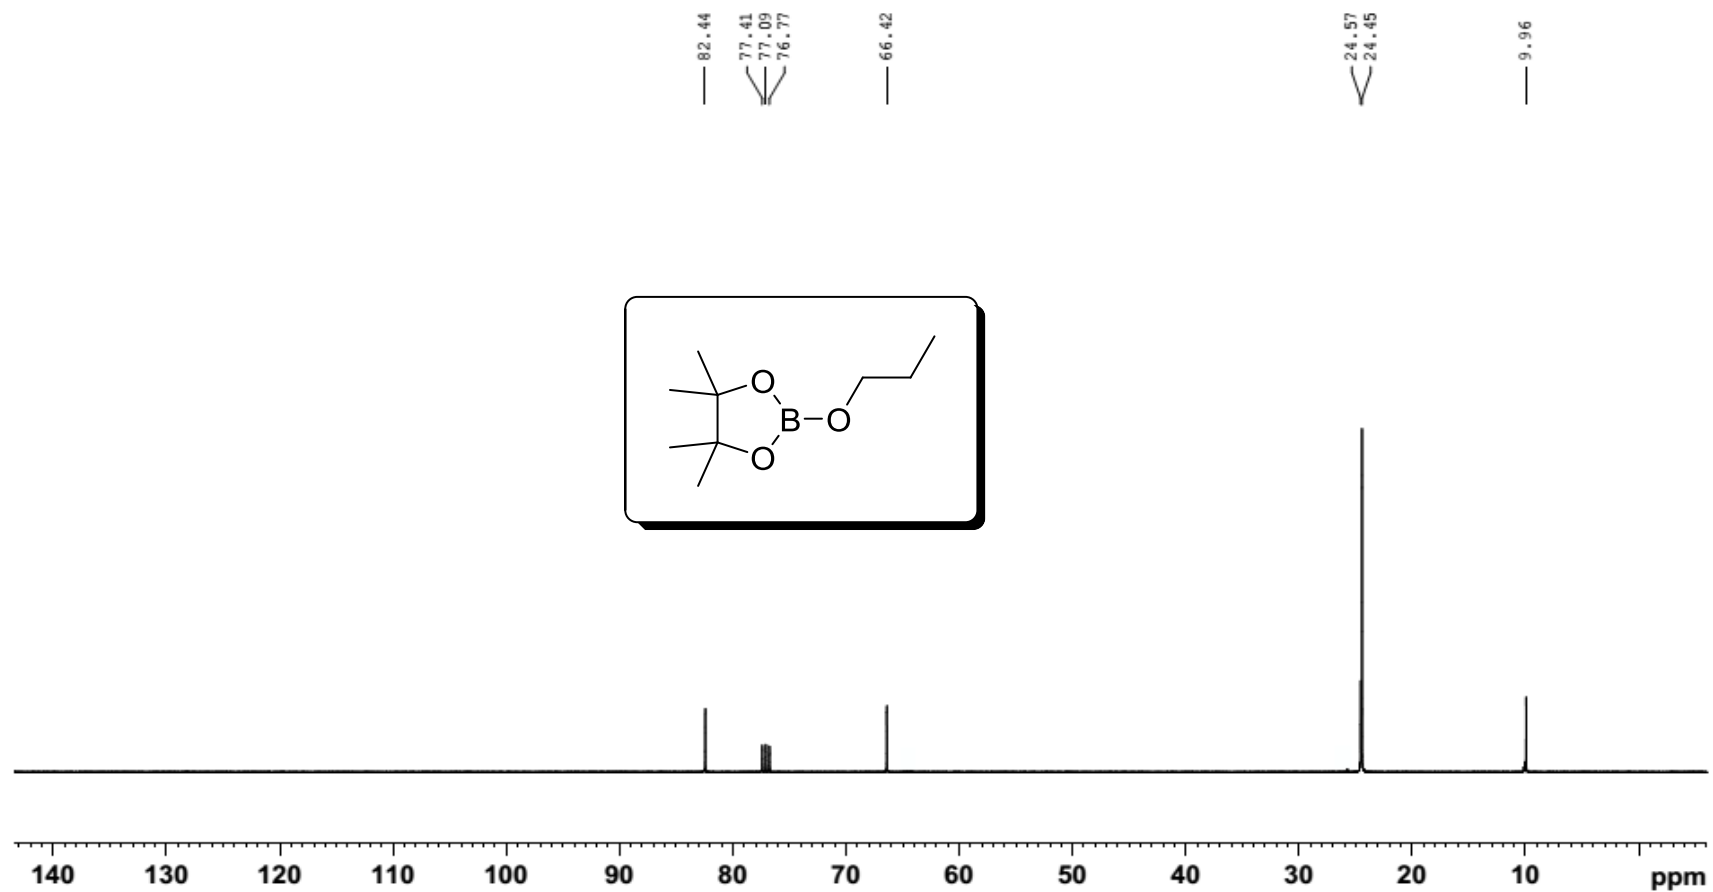

9. Copies for *In situ* IR spectra

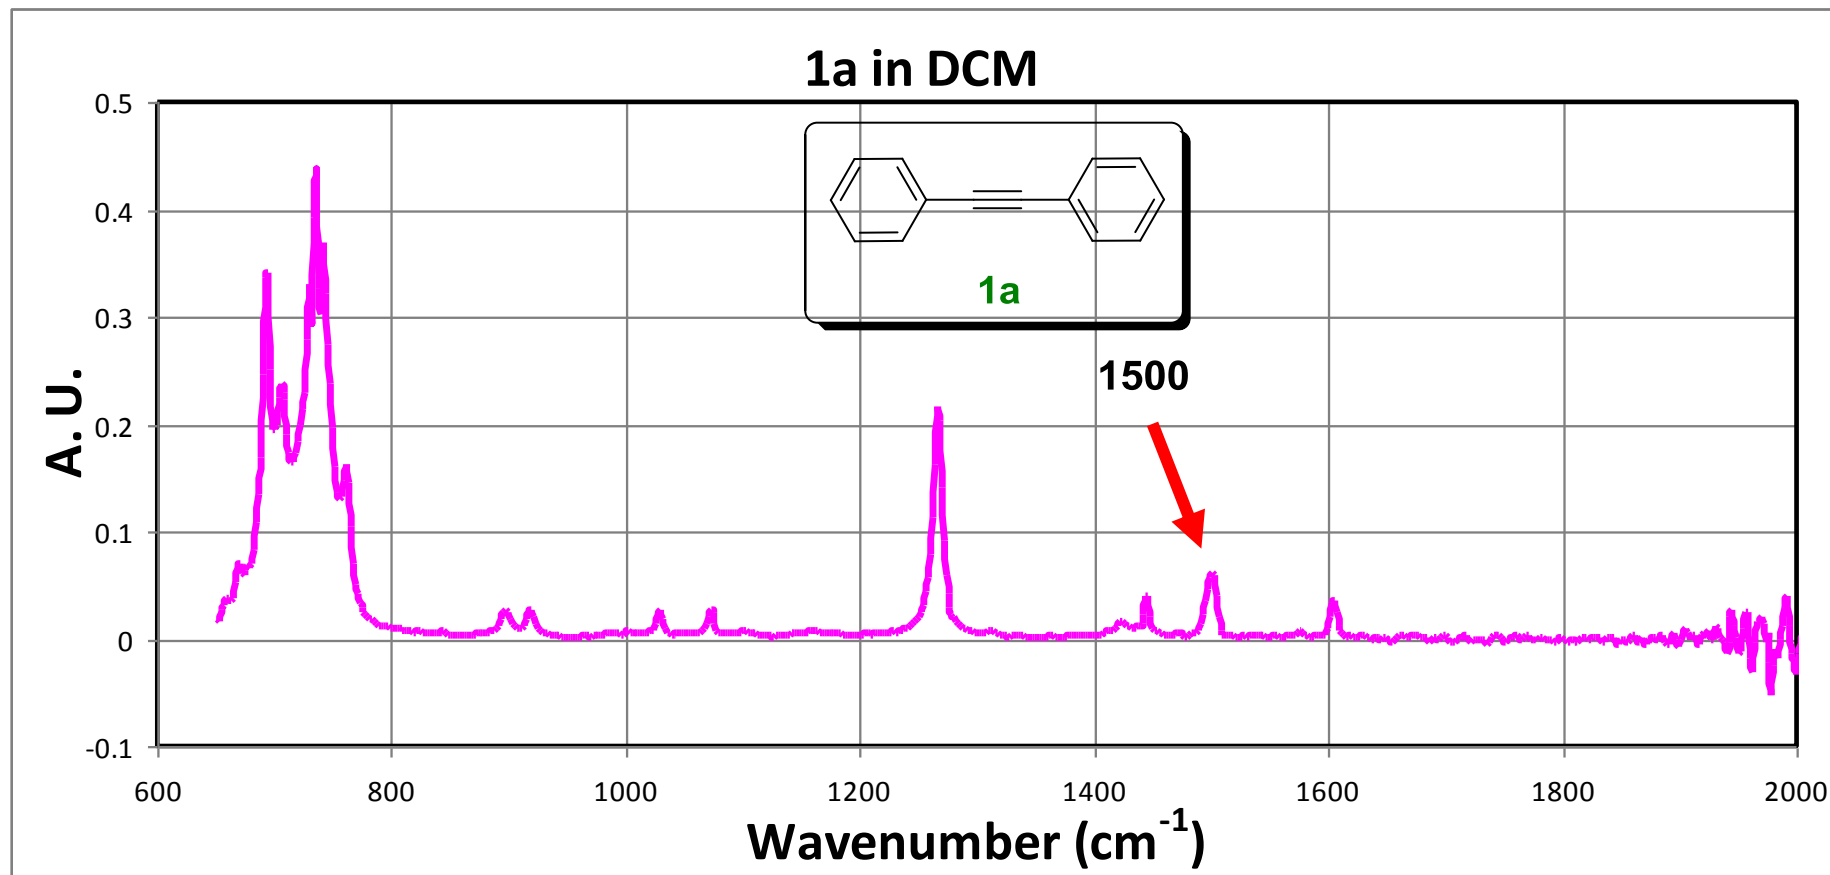

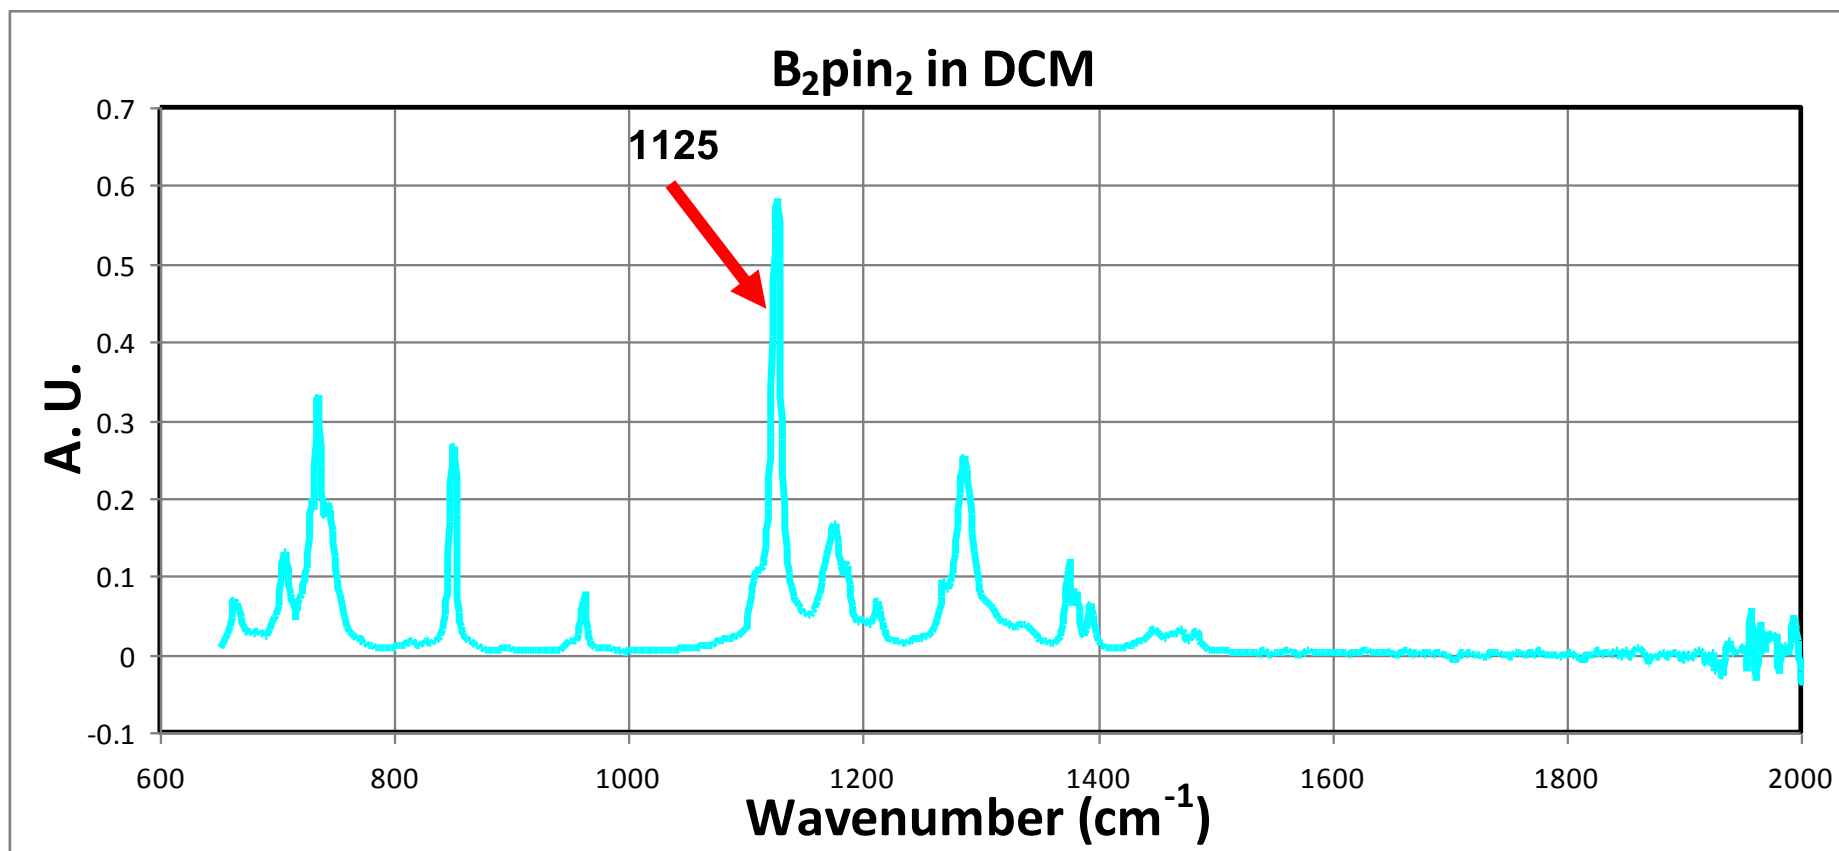

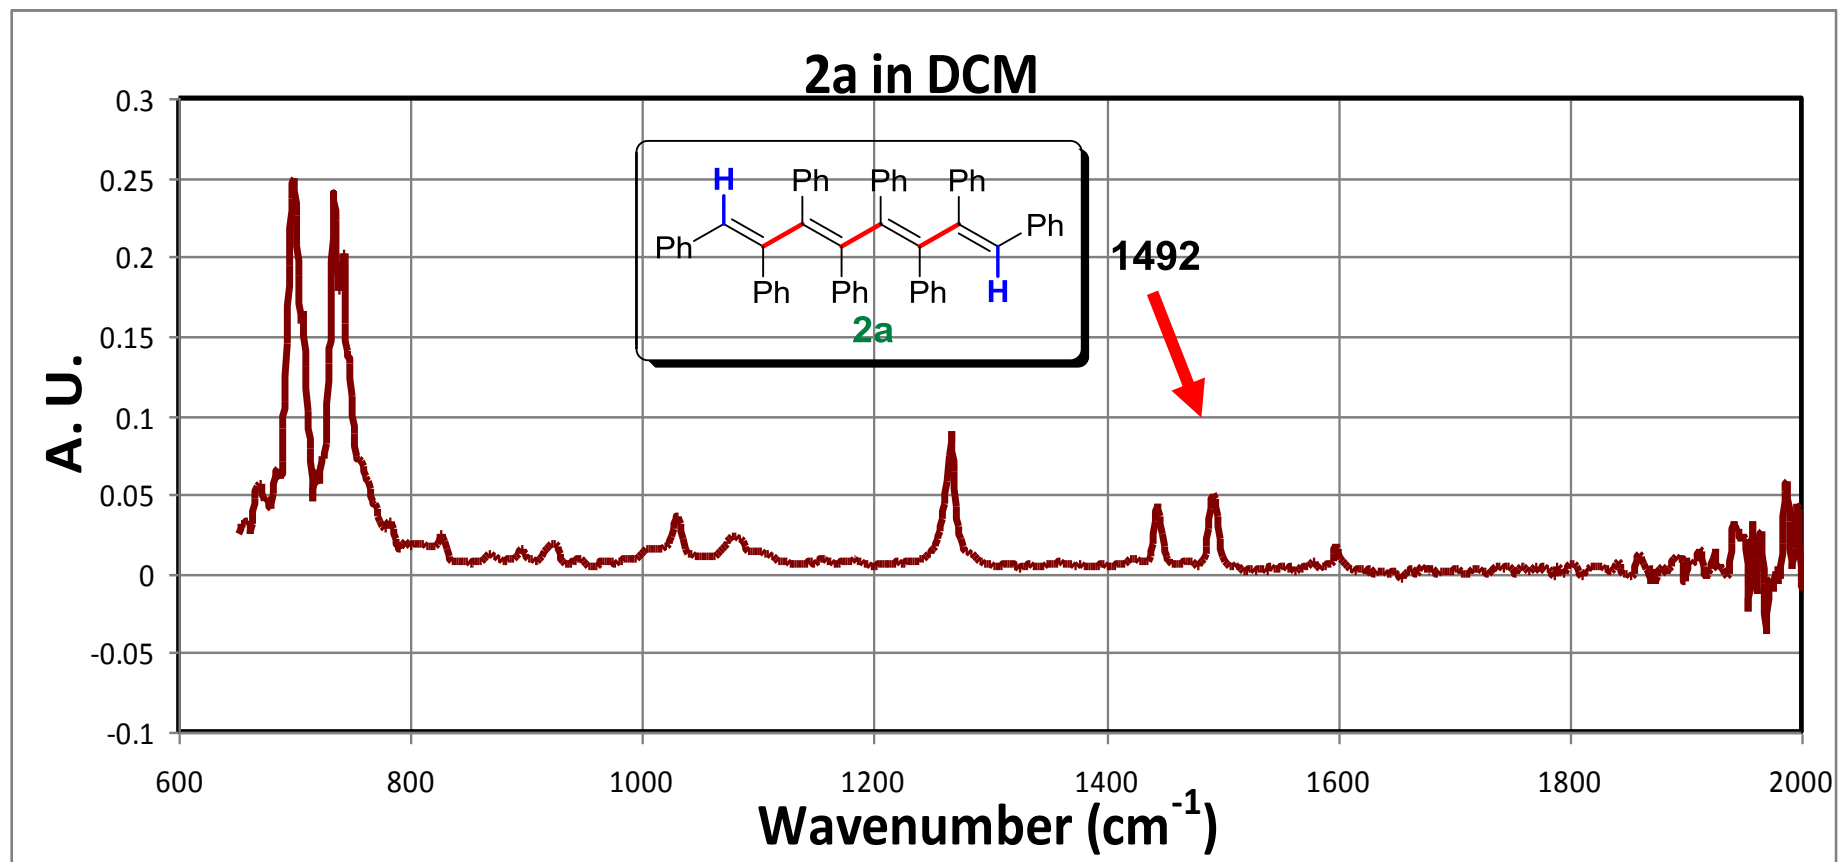

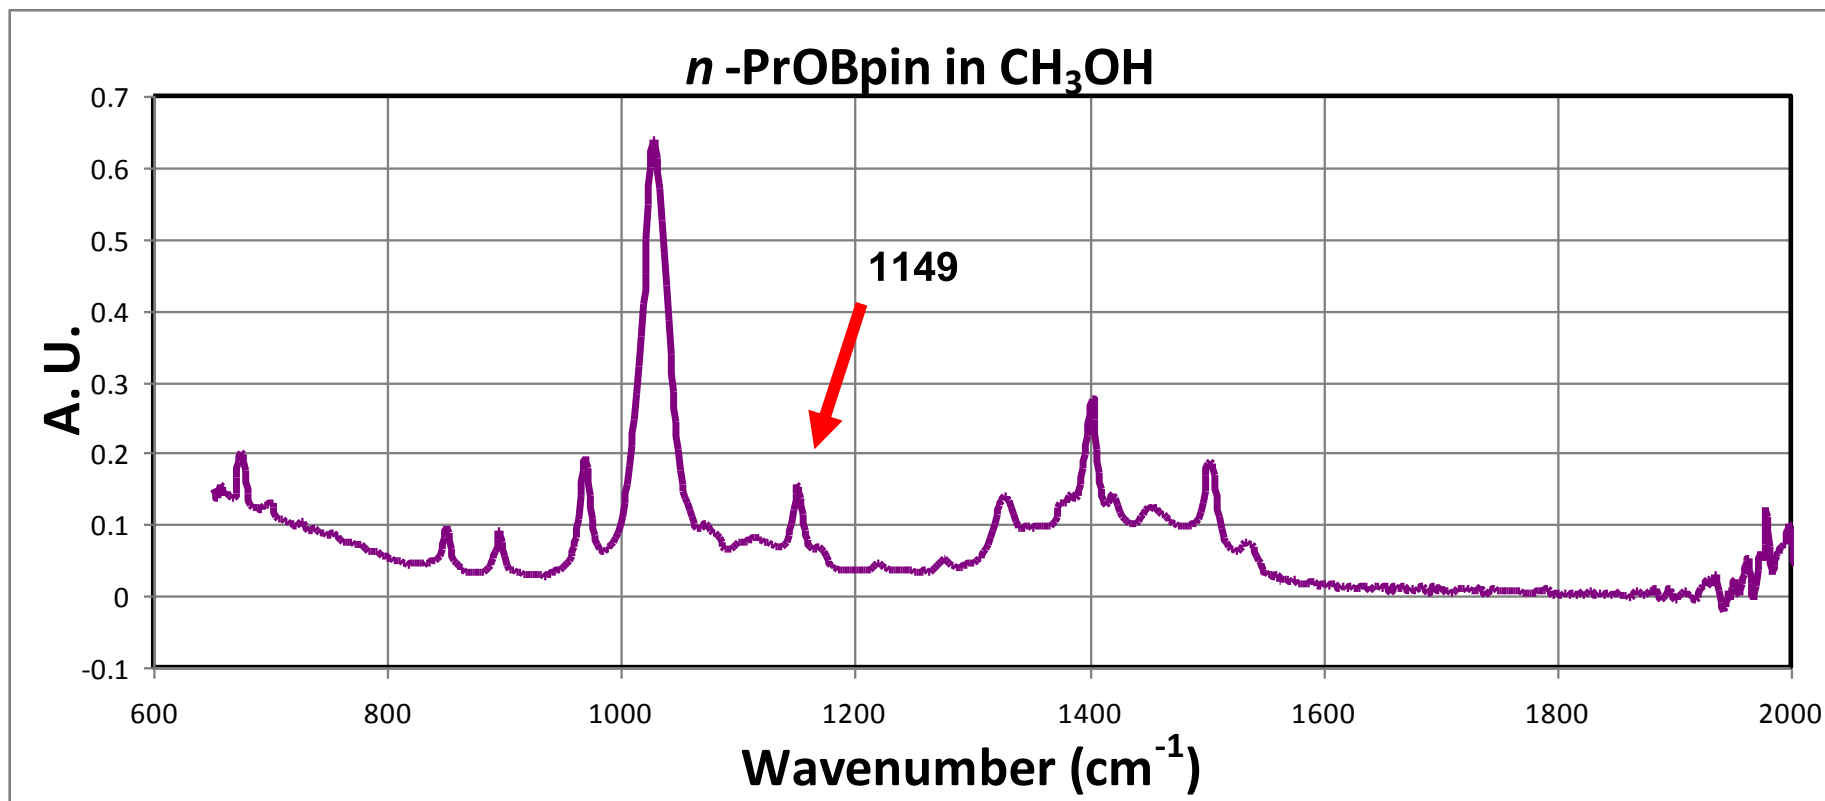

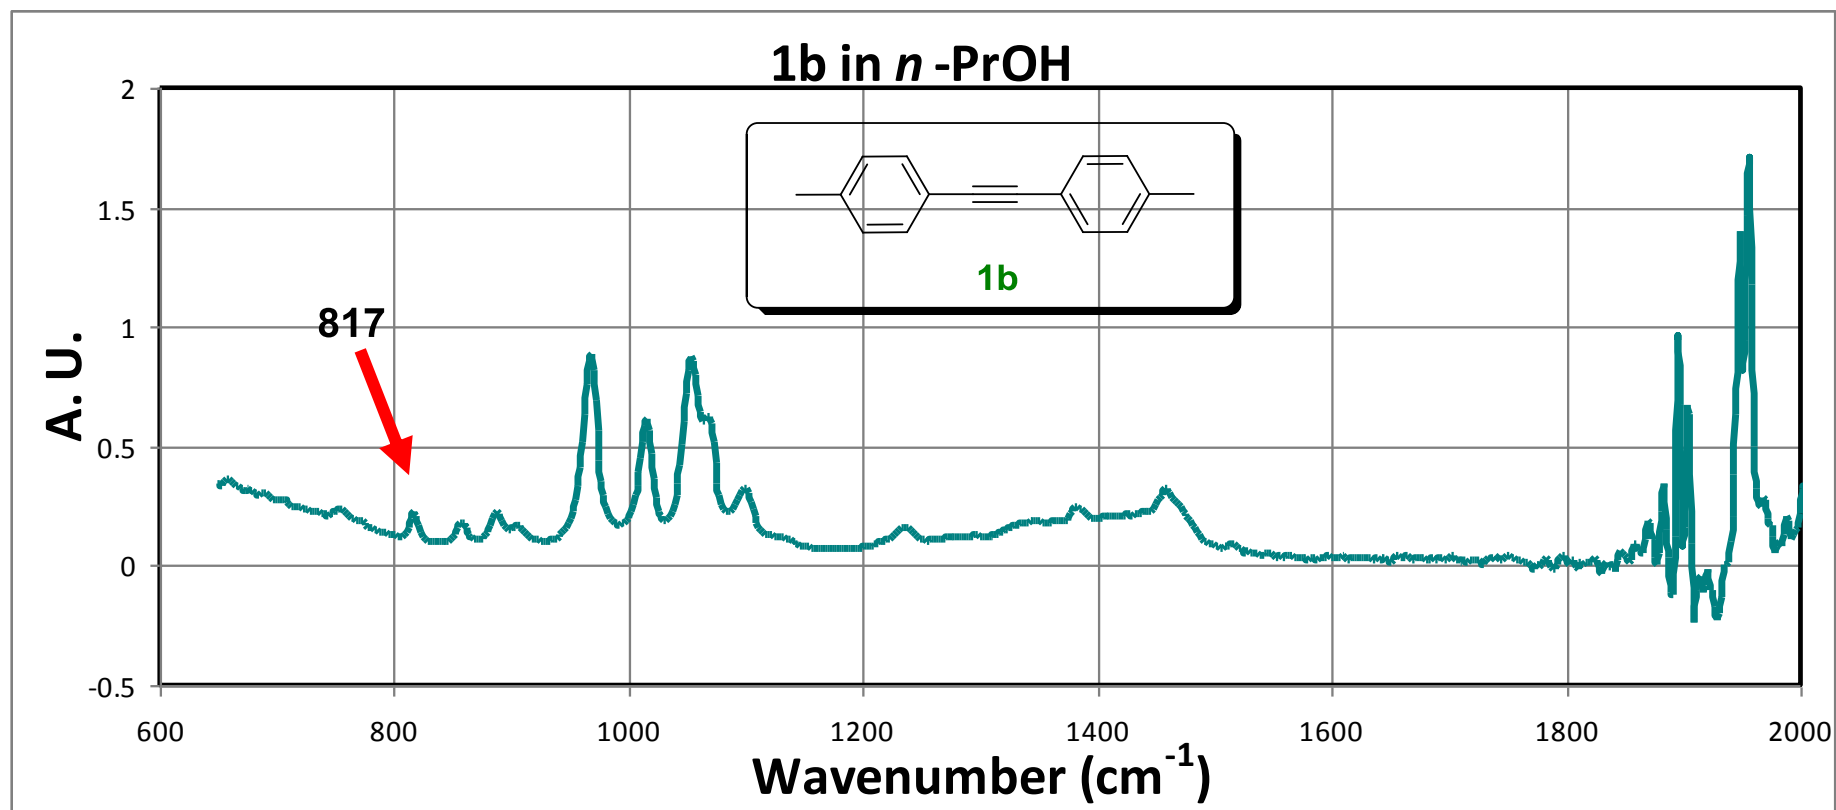

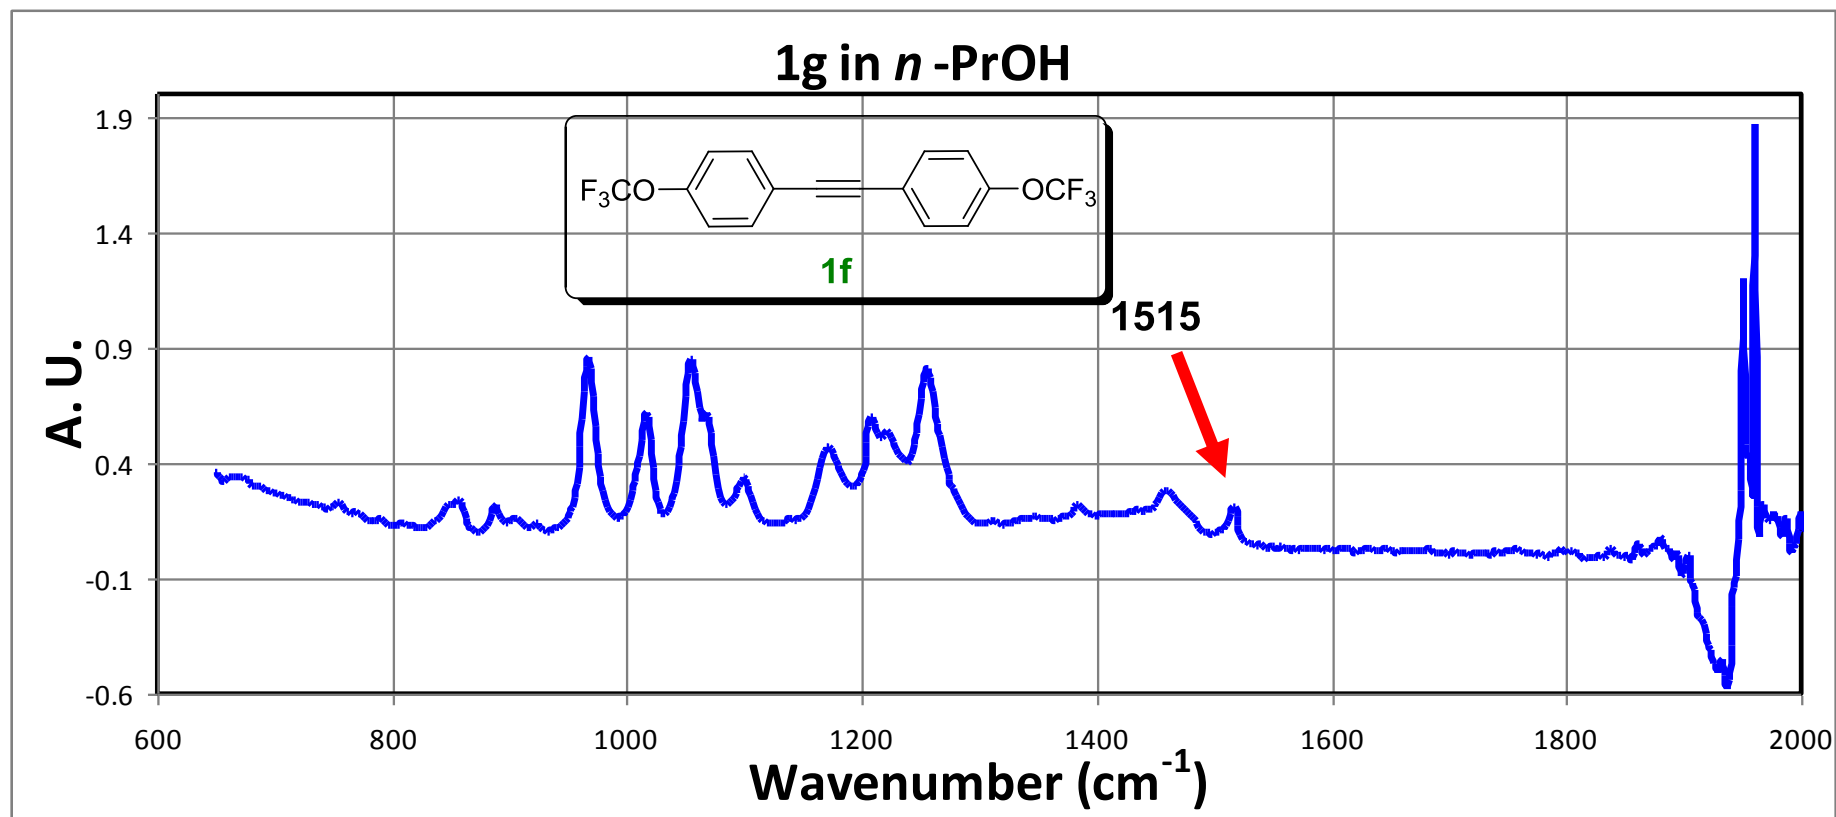

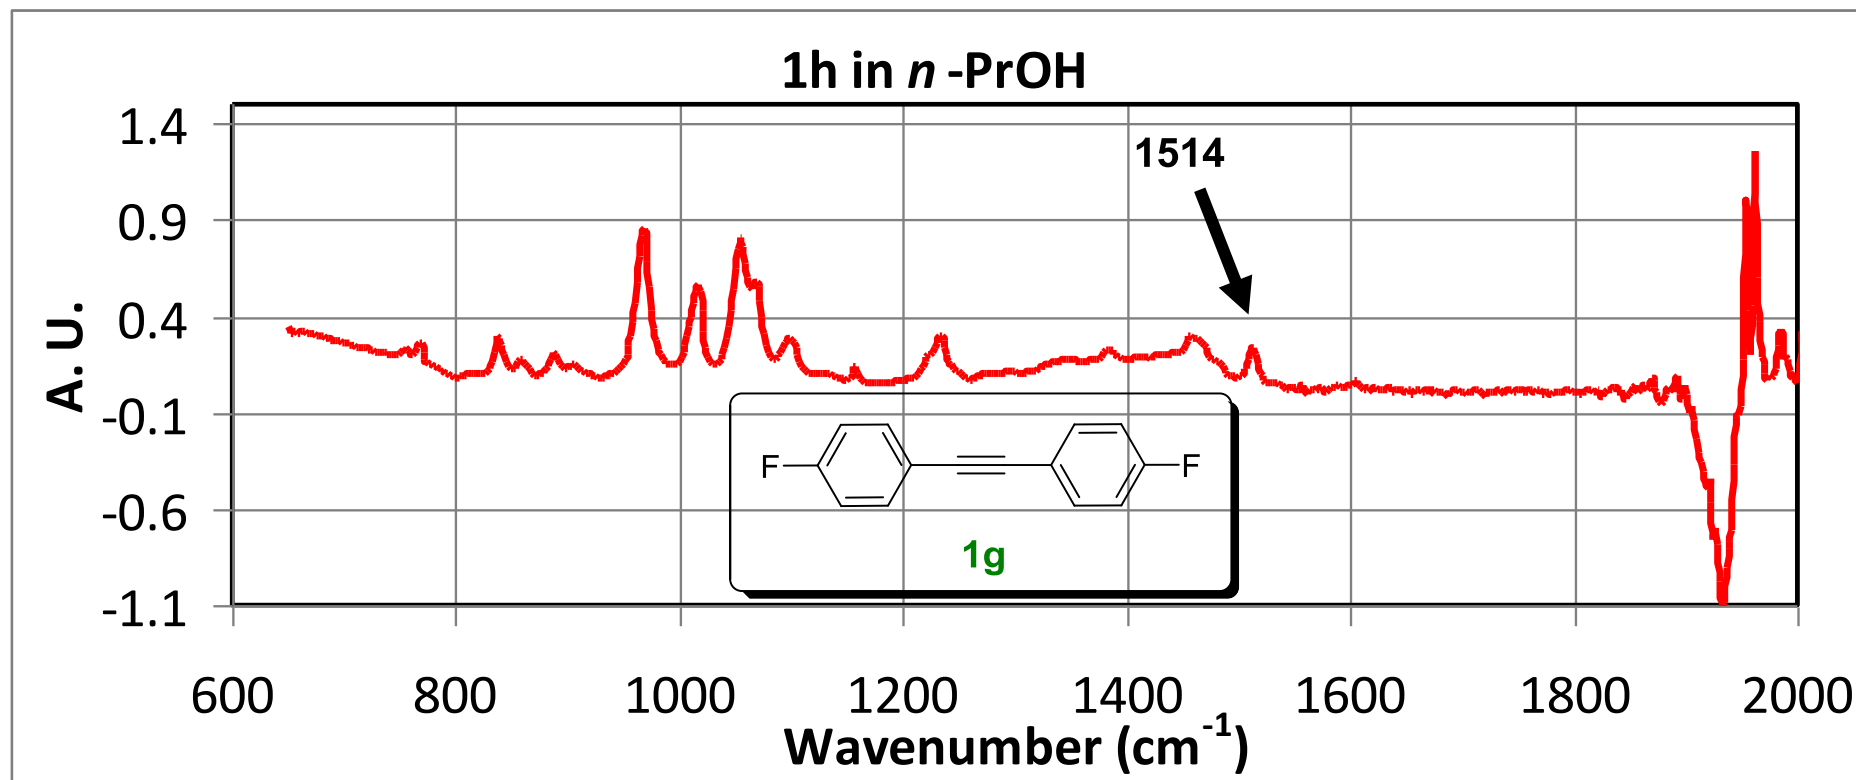



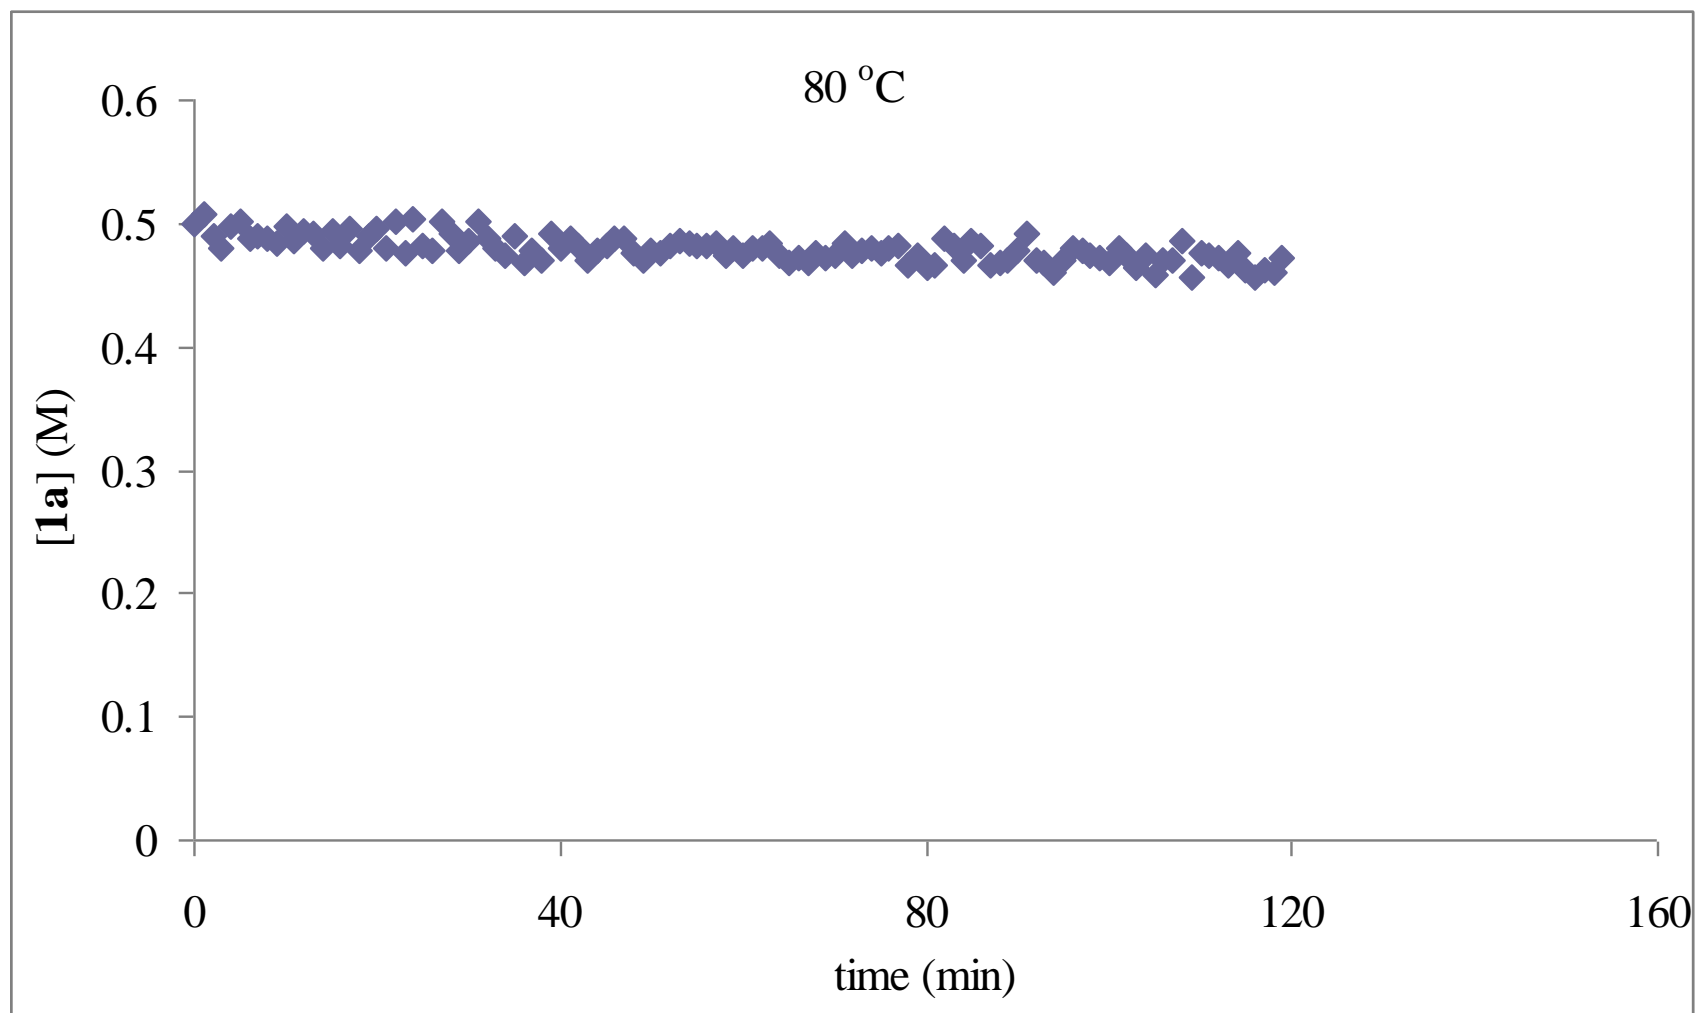

**Reaction condition:** **1a** (1.0 mmol), NiCl<sub>2</sub>(PPh<sub>3</sub>)<sub>2</sub> (0.03 mmol), B<sub>2</sub>pin<sub>2</sub> (0.3 mmol), *n*-PrOH (2.0 mL), N<sub>2</sub>, 80 °C for 2 h.

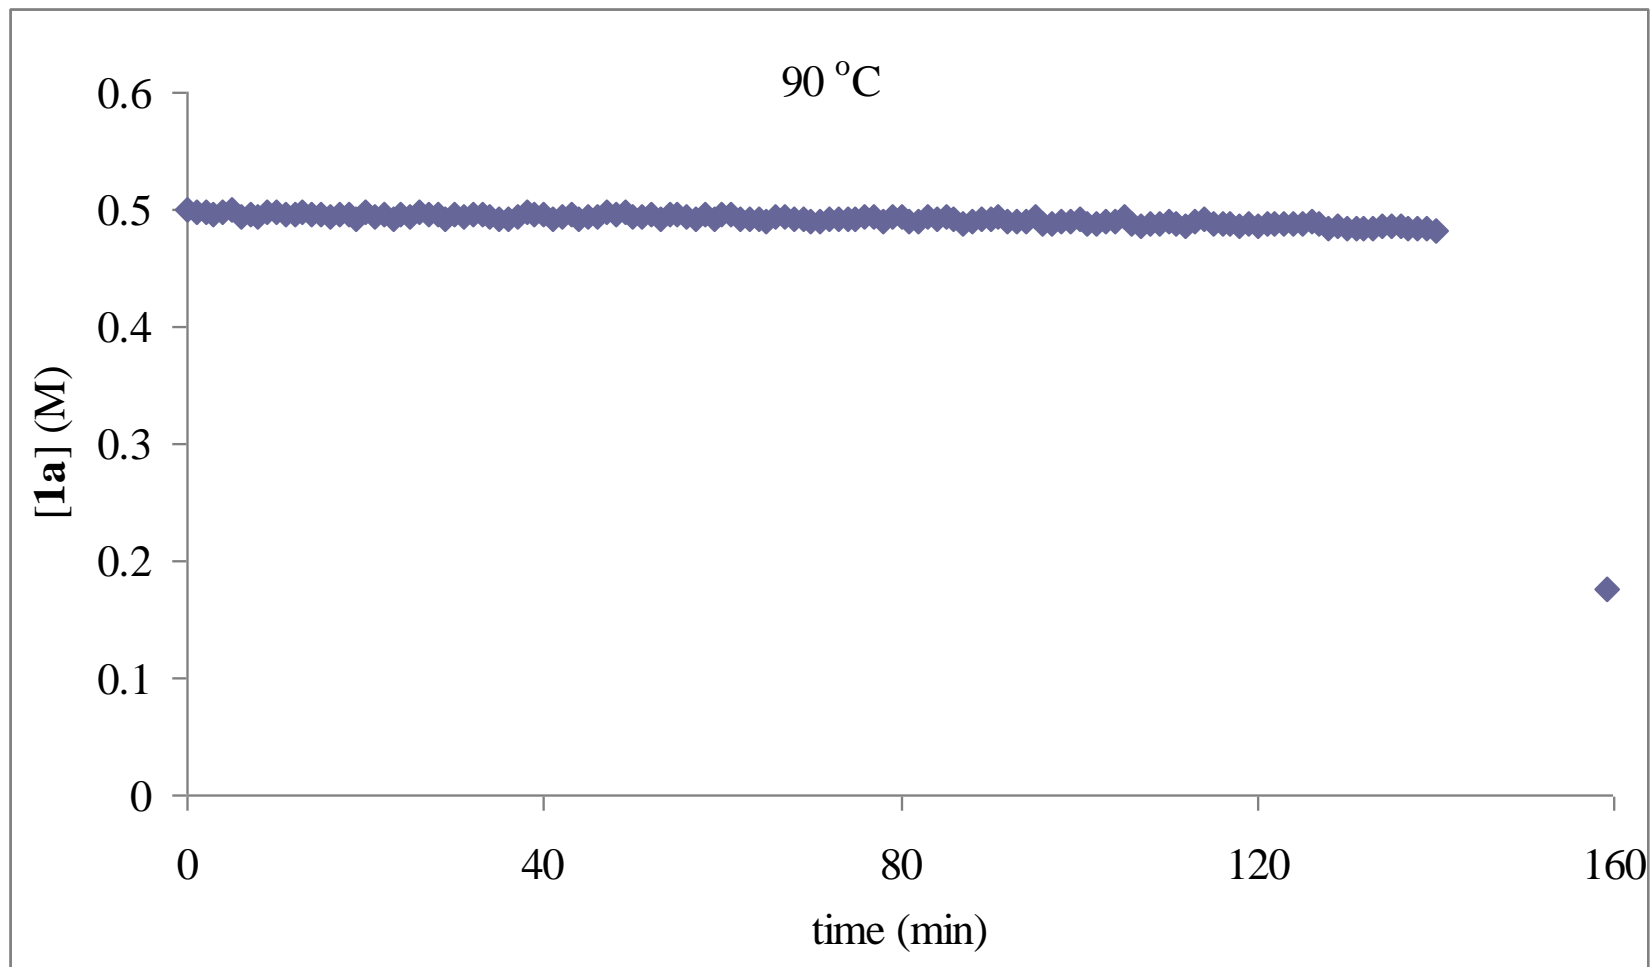

**Reaction condition:** **1a** (1.0 mmol), NiCl<sub>2</sub>(PPh<sub>3</sub>)<sub>2</sub> (0.03 mmol), B<sub>2</sub>pin<sub>2</sub> (0.3 mmol), *n*-PrOH (2.0 mL), N<sub>2</sub>, 90 °C for 2 h.

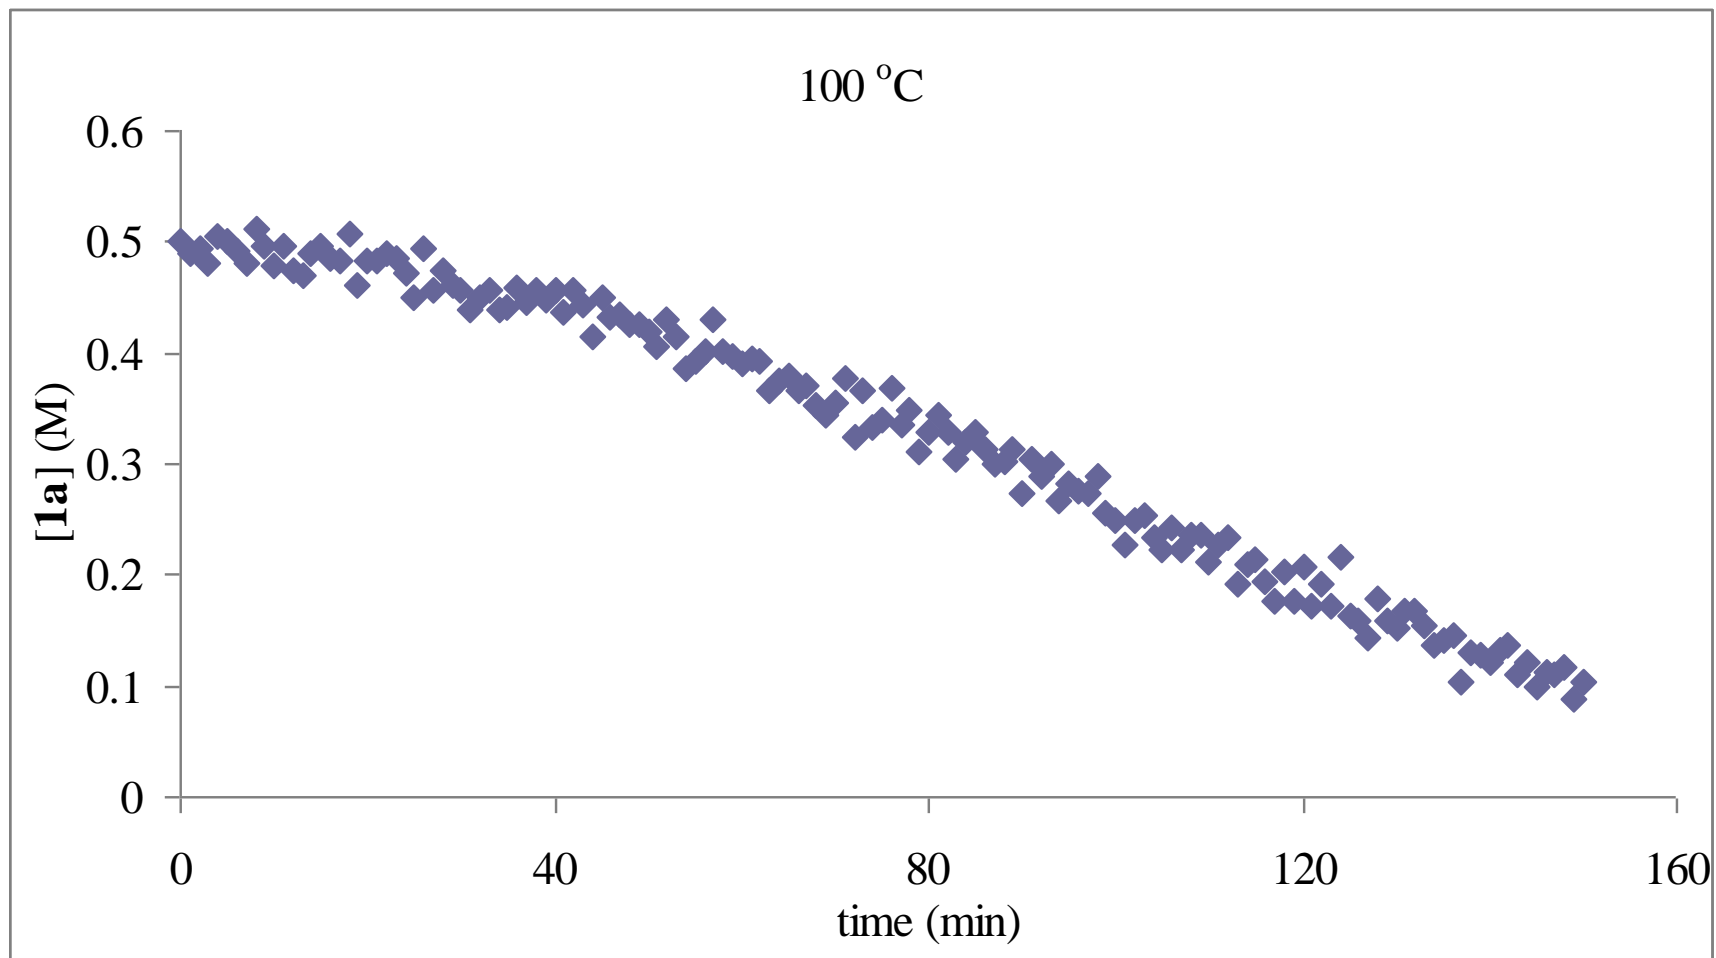

**Reaction condition:** **1a** (1.0 mmol), NiCl<sub>2</sub>(PPh<sub>3</sub>)<sub>2</sub> (0.03 mmol), B<sub>2</sub>pin<sub>2</sub> (0.3 mmol), *n*-PrOH (2.0 mL), N<sub>2</sub>, 100 °C for 3 h.

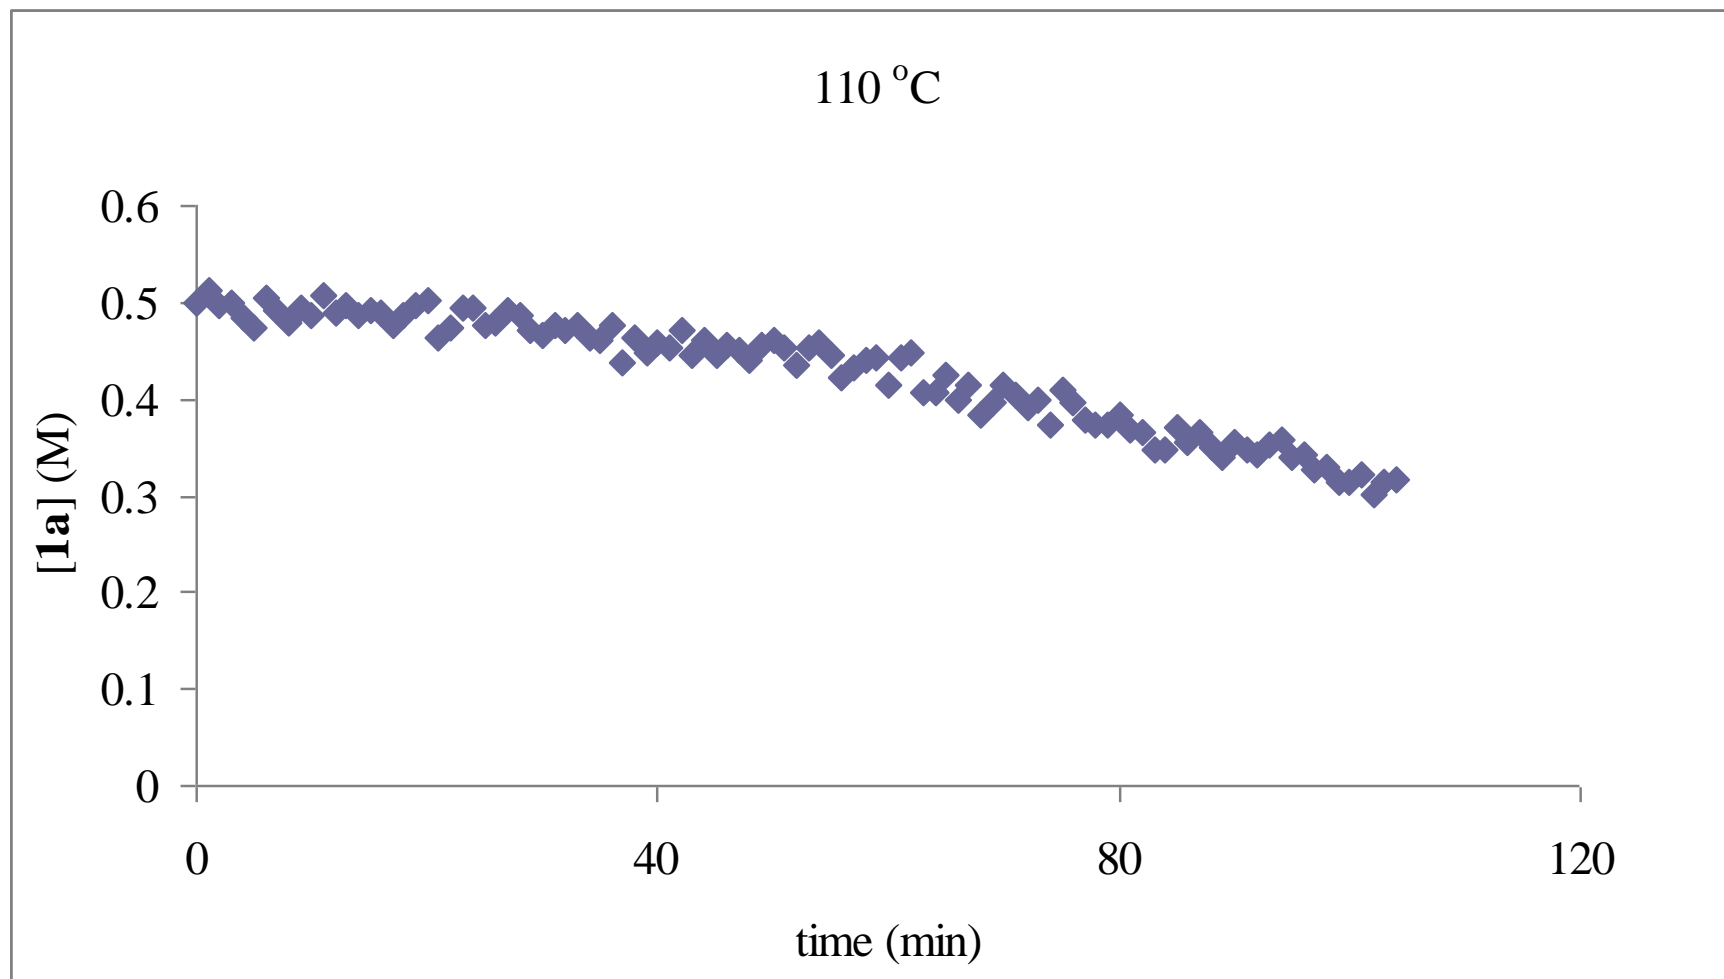

**Reaction condition:** **1a** (1.0 mmol), NiCl<sub>2</sub>(PPh<sub>3</sub>)<sub>2</sub> (0.03 mmol), B<sub>2</sub>pin<sub>2</sub> (0.3 mmol), *n*-PrOH (2.0 mL), N<sub>2</sub>, 110 °C for 2 h.

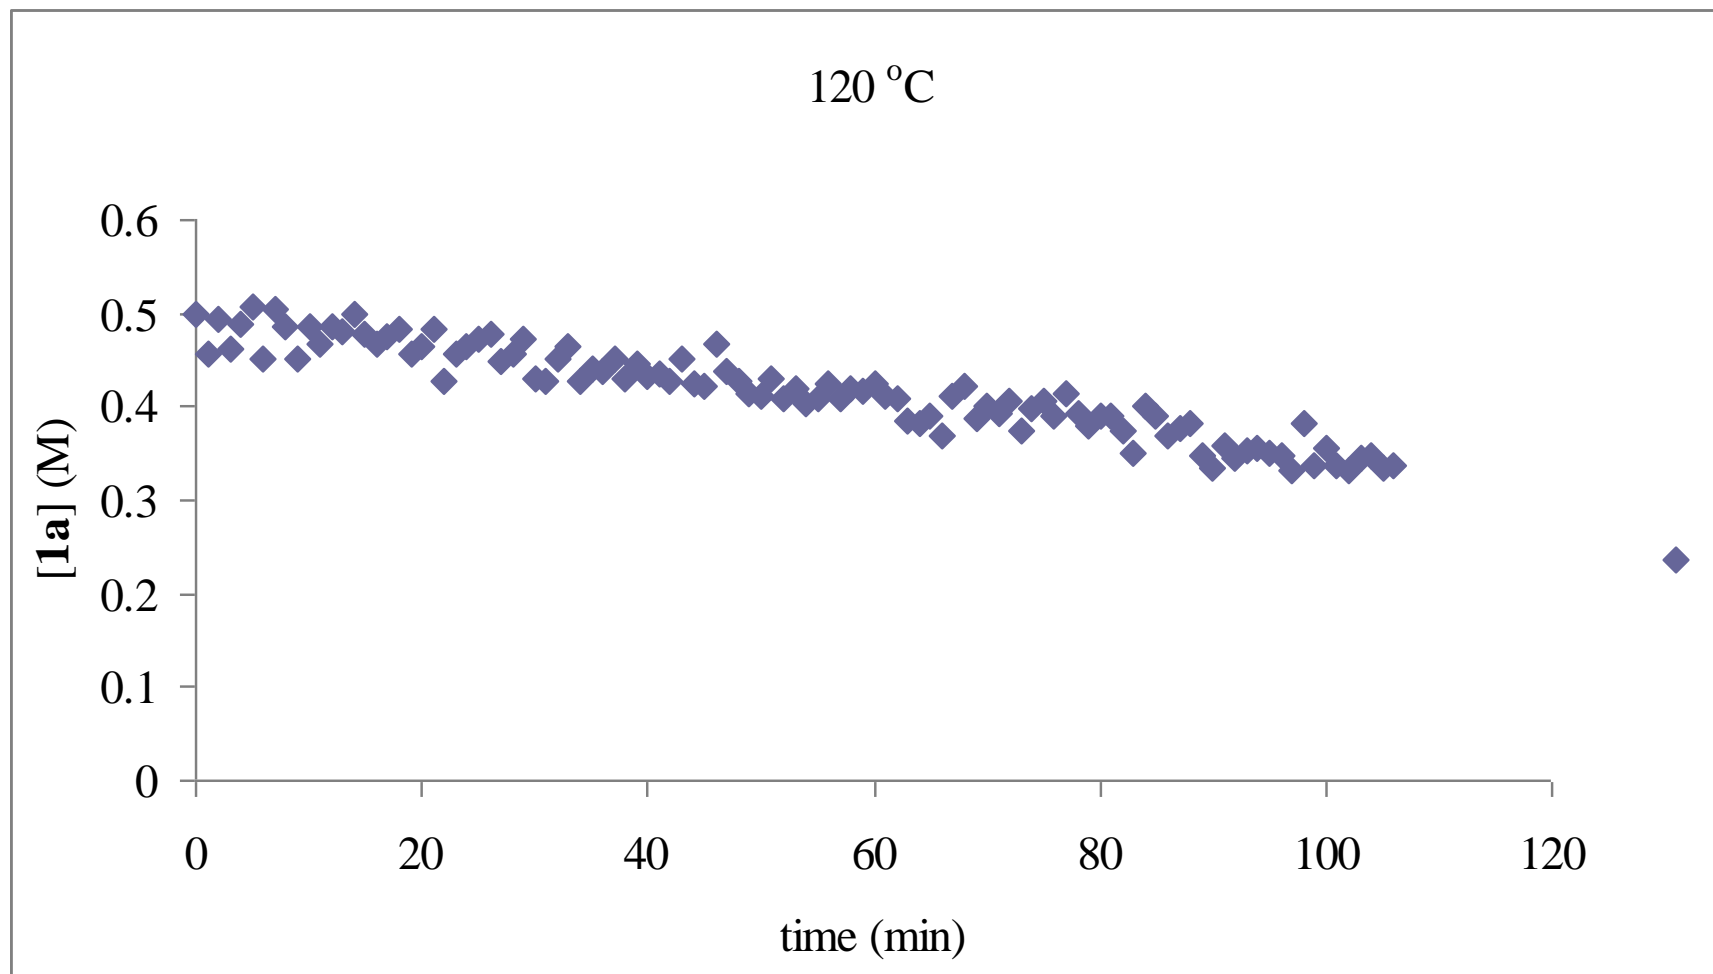

**Reaction condition:** **1a** (1.0 mmol), NiCl<sub>2</sub>(PPh<sub>3</sub>)<sub>2</sub> (0.03 mmol), B<sub>2</sub>pin<sub>2</sub> (0.3 mmol), *n*-PrOH (2.0 mL), N<sub>2</sub>, 120 °C for 2 h.

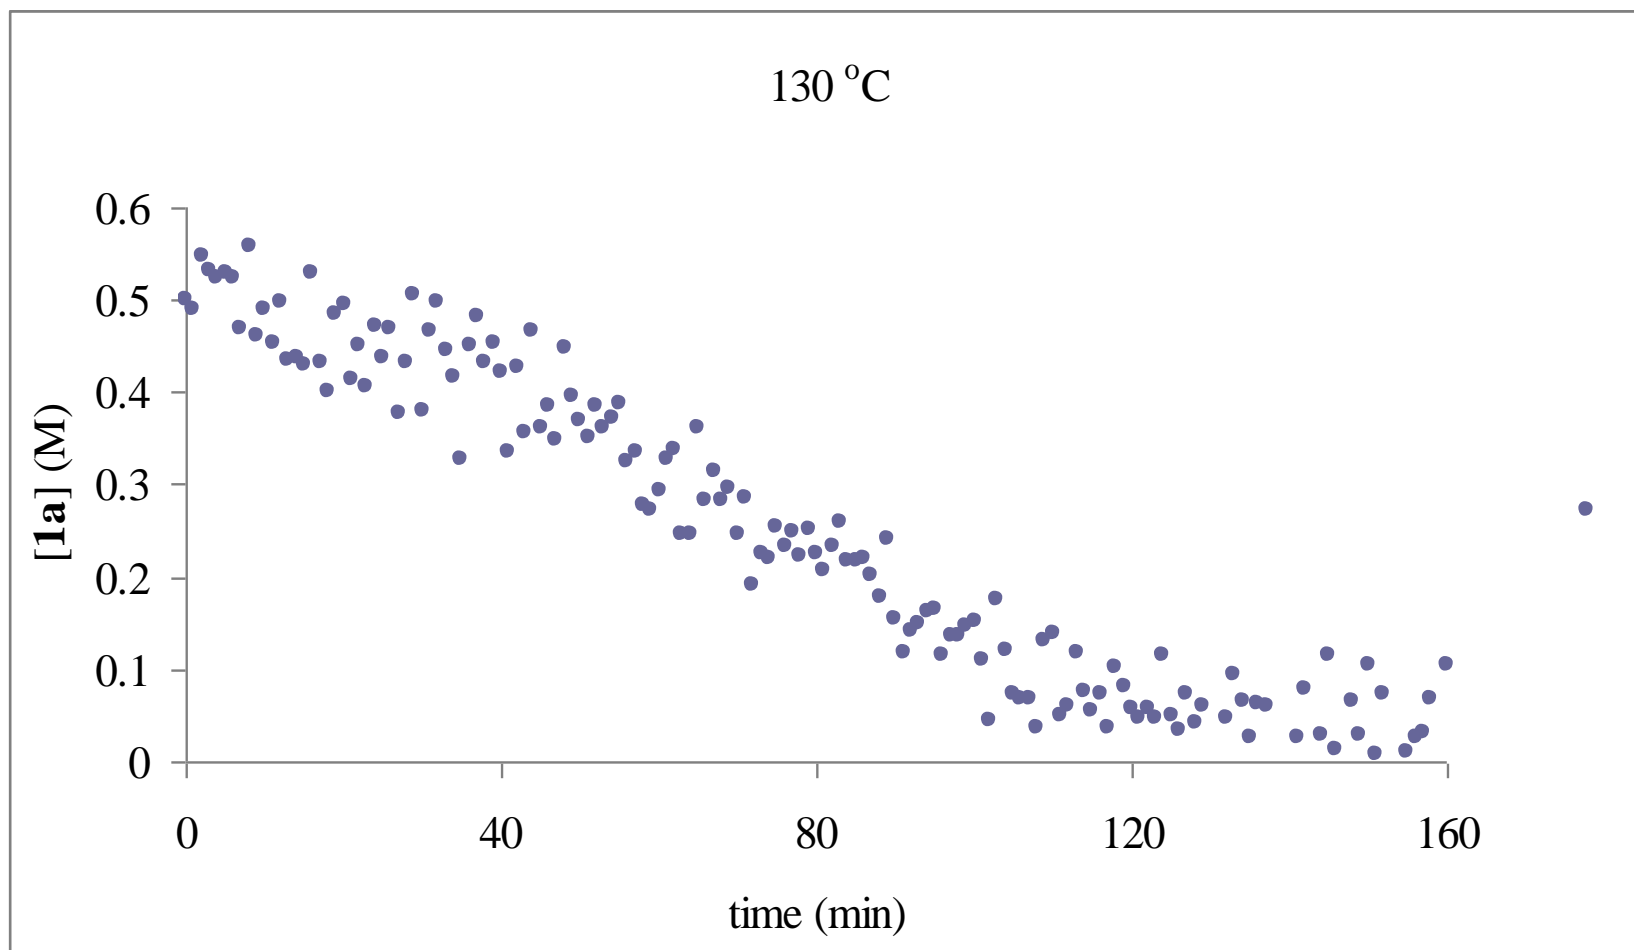

**Reaction condition:** **1a** (1.0 mmol), NiCl<sub>2</sub>(PPh<sub>3</sub>)<sub>2</sub> (0.03 mmol), B<sub>2</sub>pin<sub>2</sub> (0.3 mmol), *n*-PrOH (2.0 mL), N<sub>2</sub>, 130 °C for 3 h.

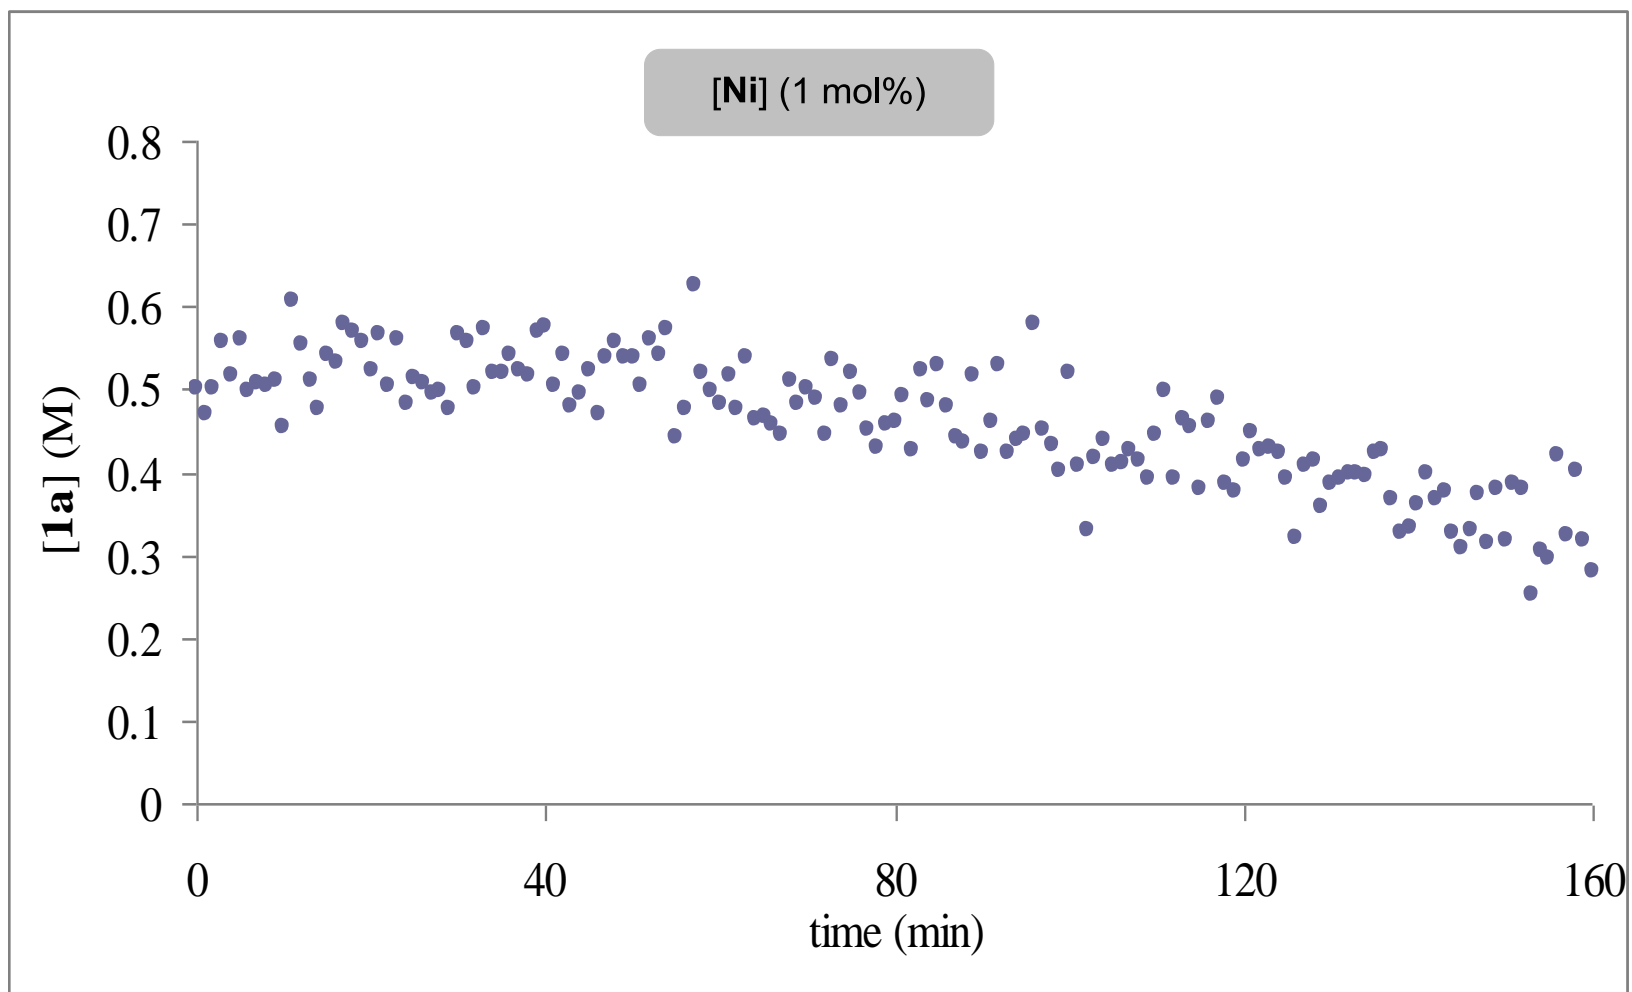

**Reaction condition:** **1a** (1.0 mmol), NiCl<sub>2</sub>(PPh<sub>3</sub>)<sub>2</sub> (0.01 mmol), B<sub>2</sub>pin<sub>2</sub> (0.3 mmol), *n*-PrOH (2.0 mL), N<sub>2</sub>, 120 °C for 3 h.

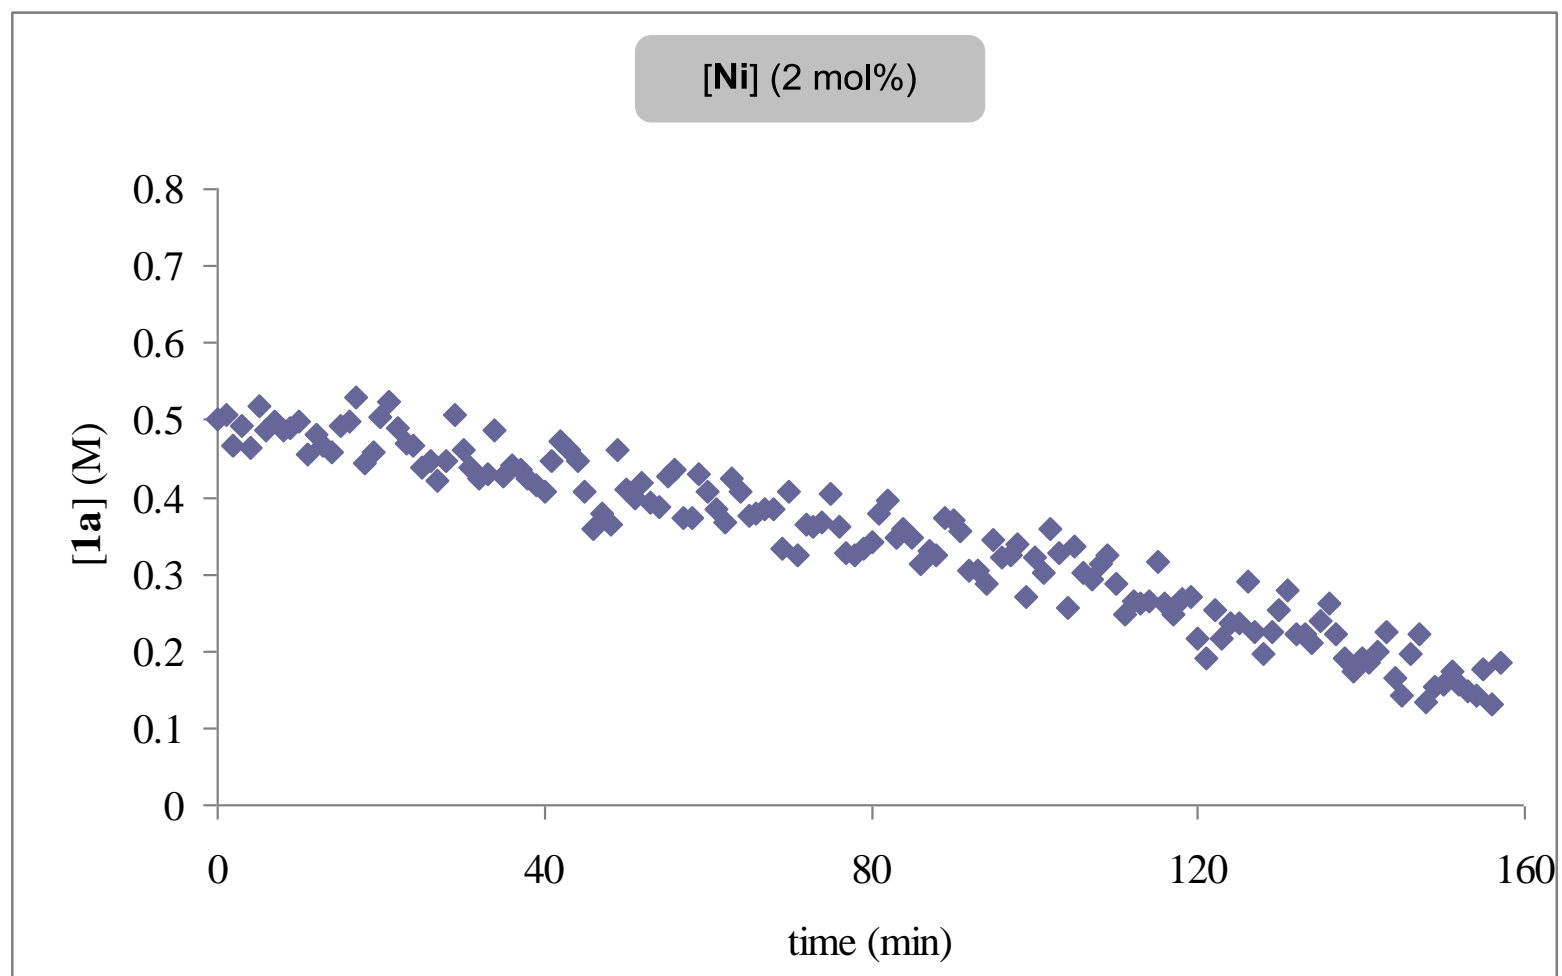

**Reaction condition:** **1a** (1.0 mmol), NiCl<sub>2</sub>(PPh<sub>3</sub>)<sub>2</sub> (0.02 mmol), B<sub>2</sub>pin<sub>2</sub> (0.3 mmol), *n*-PrOH (2.0 mL), N<sub>2</sub>, 120 °C for 3 h.



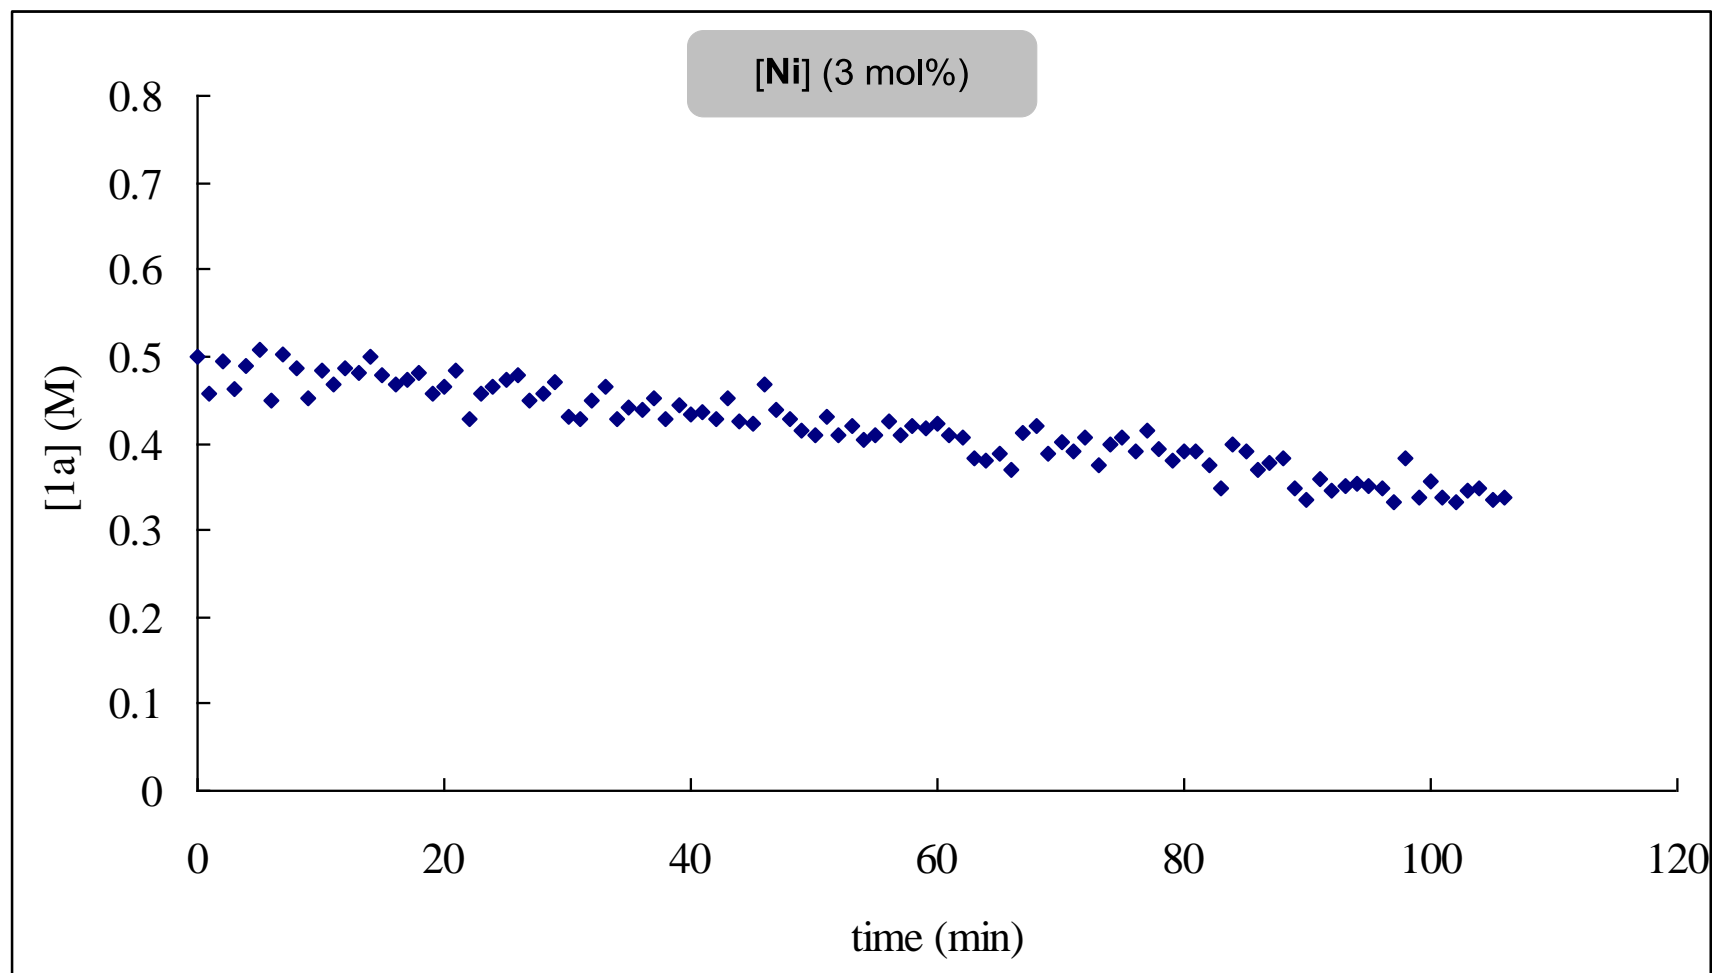

**Reaction condition:** **1a** (1.0 mmol), NiCl<sub>2</sub>(PPh<sub>3</sub>)<sub>2</sub> (0.03 mmol), B<sub>2</sub>pin<sub>2</sub> (0.3 mmol), *n*-PrOH (2.0 mL), N<sub>2</sub>, 120 °C for 2 h.

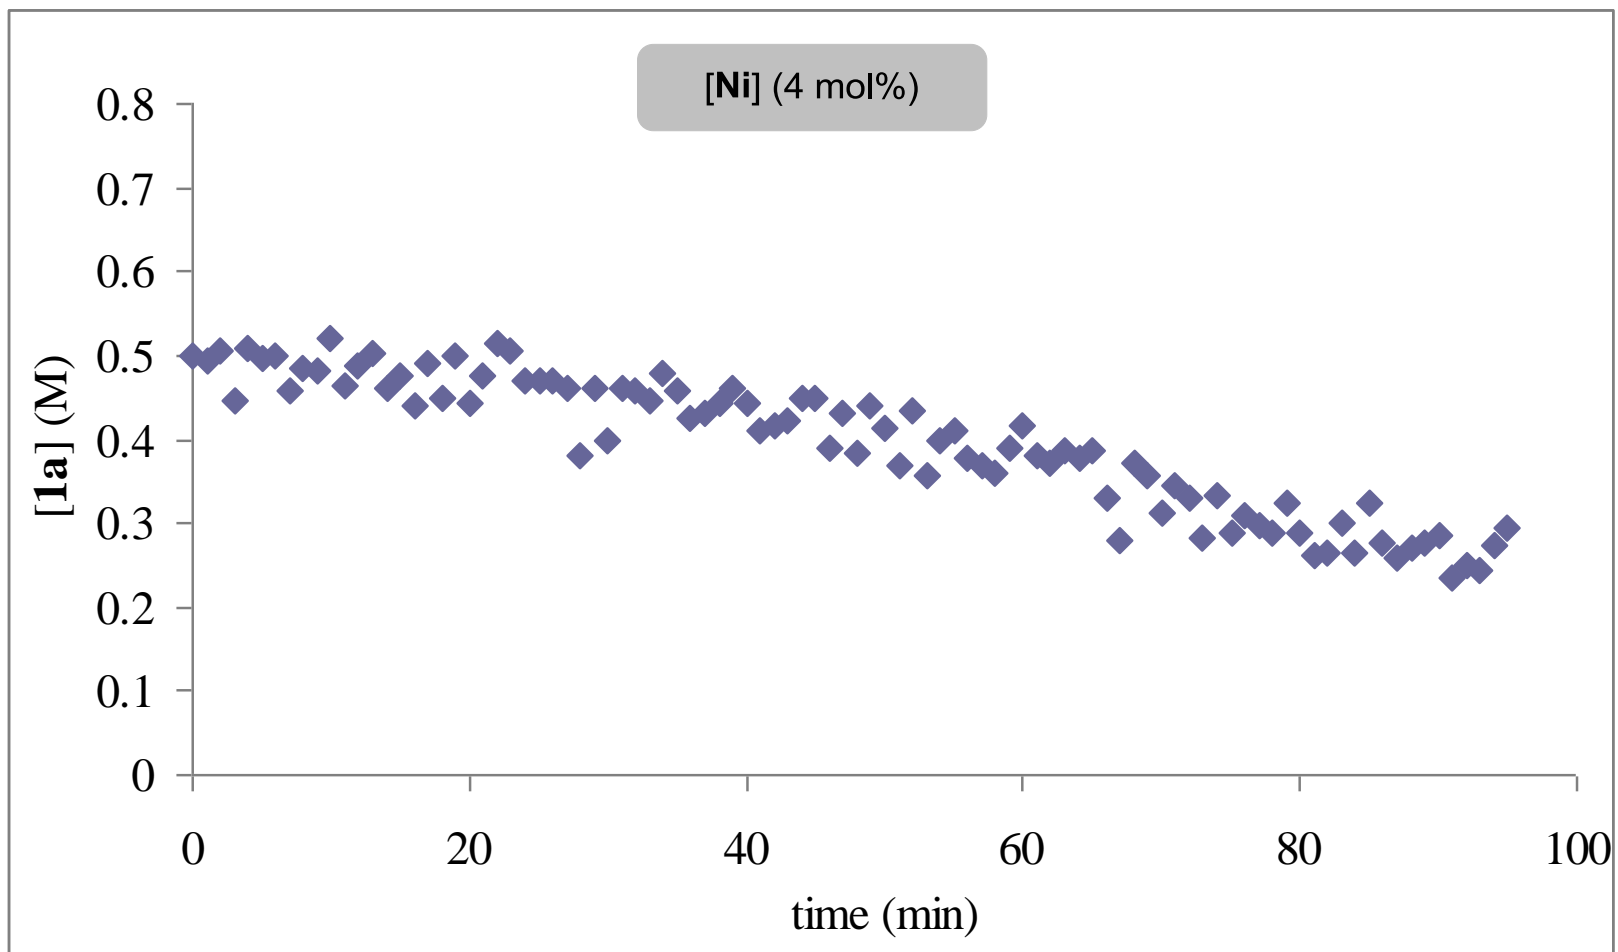

**Reaction condition:** **1a** (1.0 mmol), NiCl<sub>2</sub>(PPh<sub>3</sub>)<sub>2</sub> (0.04 mmol), B<sub>2</sub>pin<sub>2</sub> (0.3 mmol), *n*-PrOH (2.0 mL), N<sub>2</sub>, 120 °C for 2 h.

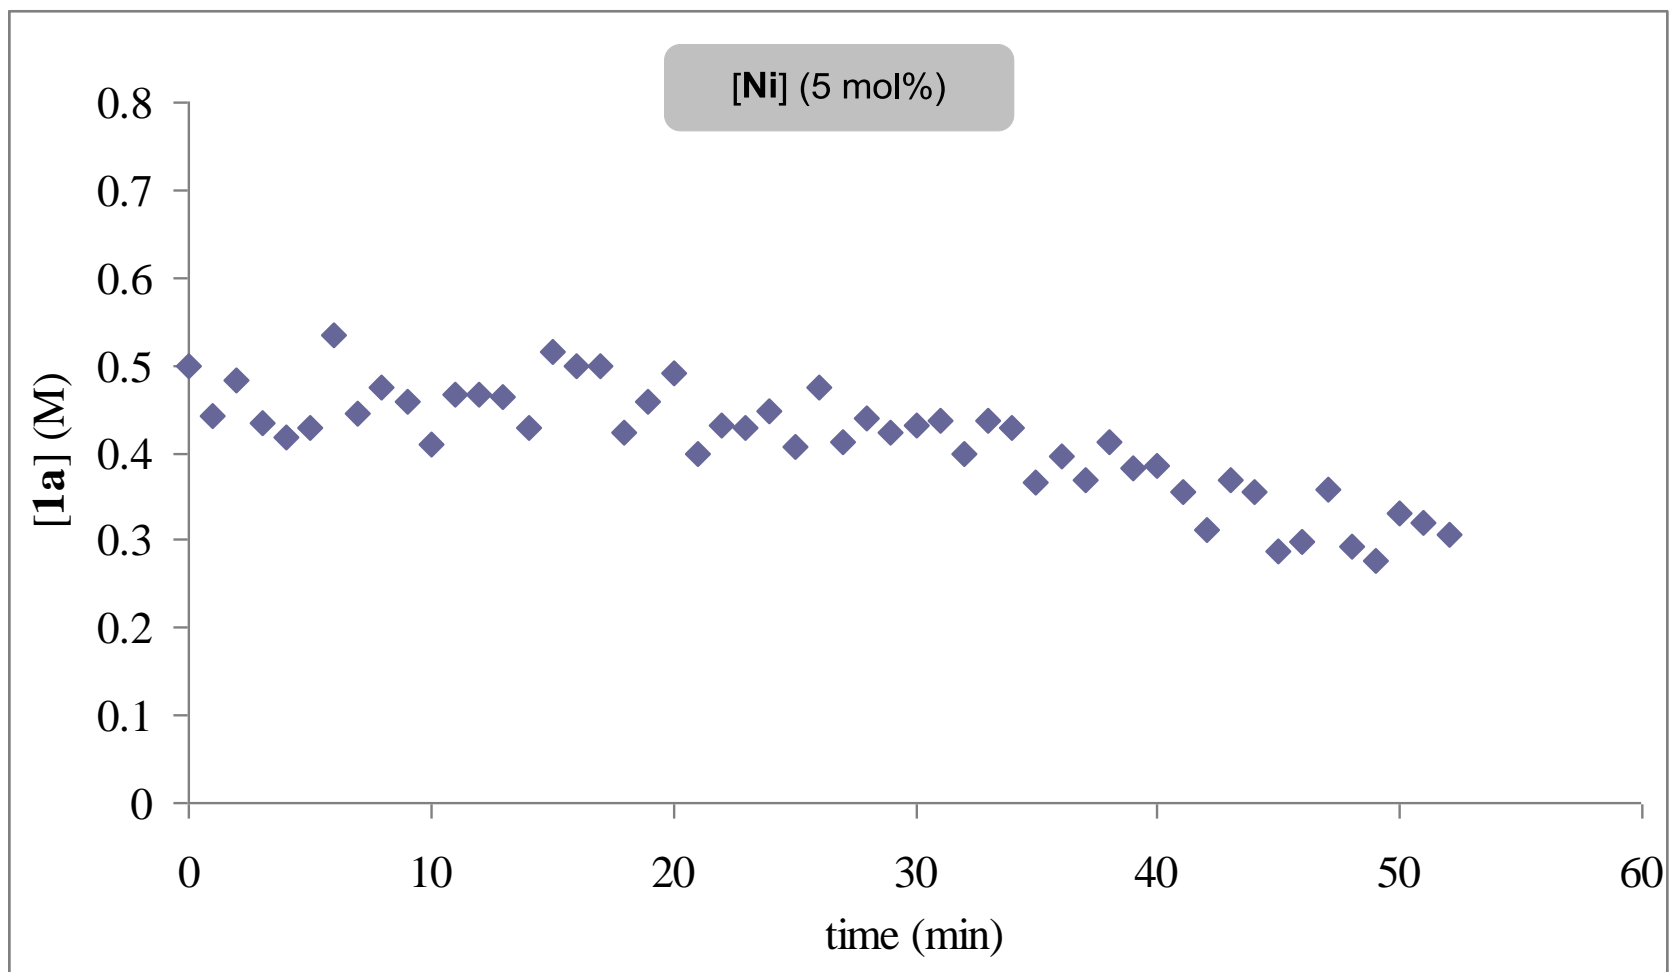

**Reaction condition:** **1a** (1.0 mmol),  $\text{NiCl}_2(\text{PPh}_3)_2$  (0.05 mmol),  $\text{B}_2\text{pin}_2$  (0.3 mmol), *n*-PrOH (2.0 mL),  $\text{N}_2$ , 120 °C for 1 h.

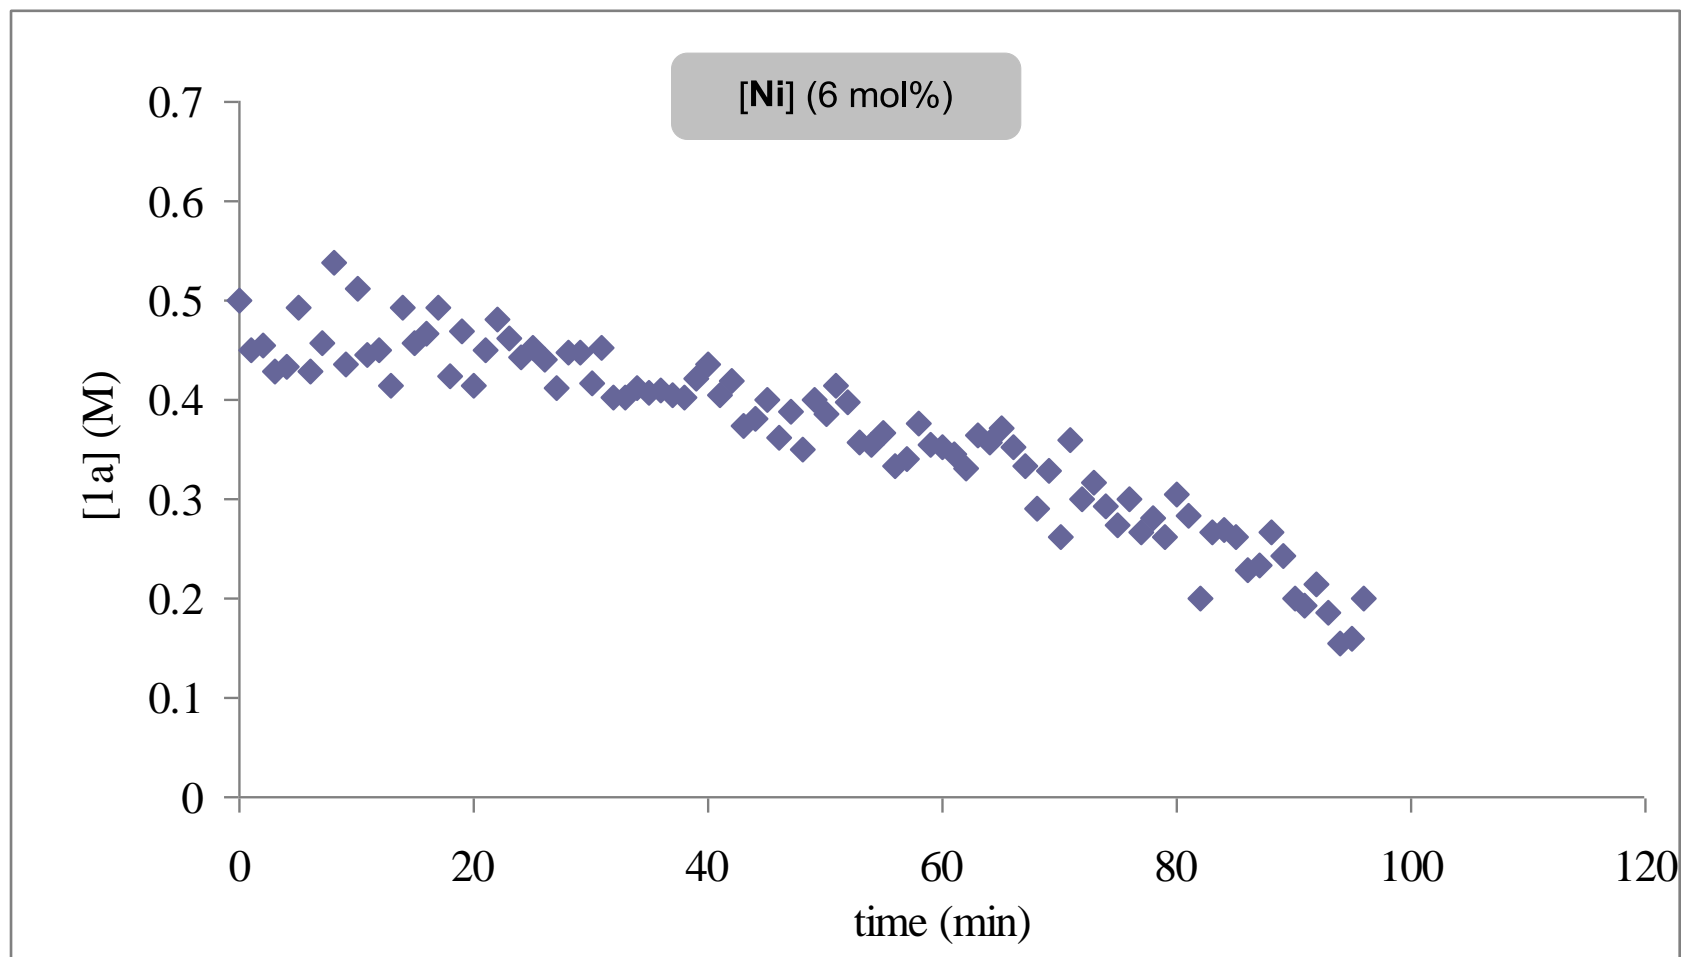

**Reaction condition:** **1a** (1.0 mmol), NiCl<sub>2</sub>(PPh<sub>3</sub>)<sub>2</sub> (0.06 mmol), B<sub>2</sub>pin<sub>2</sub> (0.3 mmol), *n*-PrOH (2.0 mL), N<sub>2</sub>, 120 °C for 2 h.

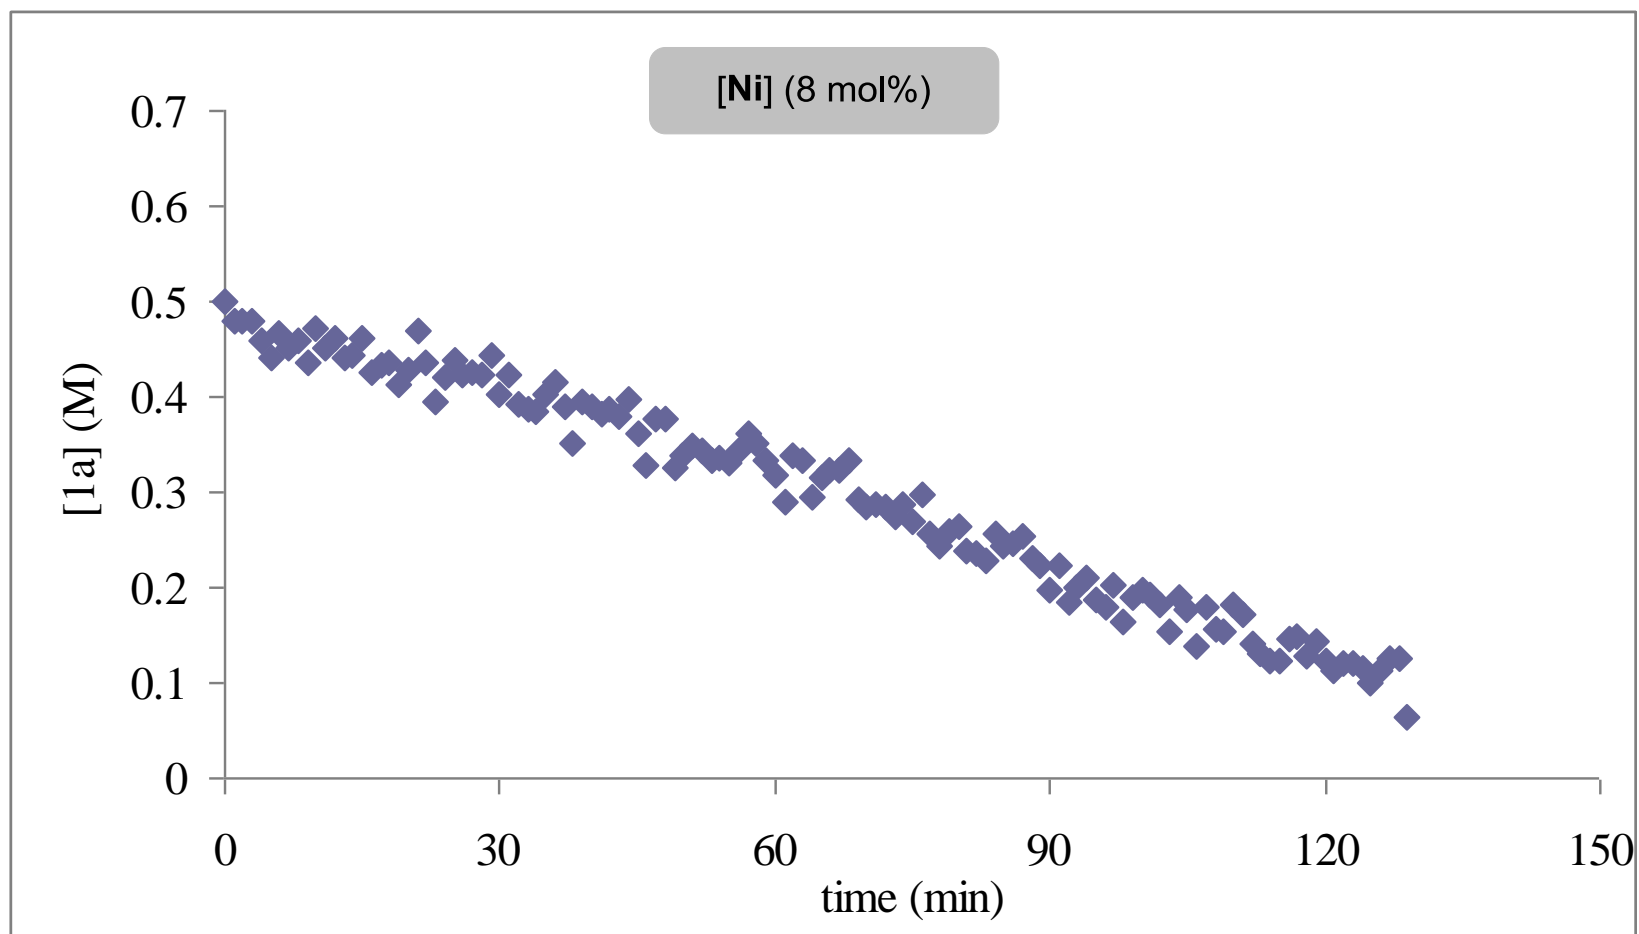

**Reaction condition:** **1a** (1.0 mmol),  $\text{NiCl}_2(\text{PPh}_3)_2$  (0.08 mmol),  $\text{B}_2\text{pin}_2$  (0.3 mmol), *n*-PrOH (2.0 mL),  $\text{N}_2$ , 120 °C for 3 h.

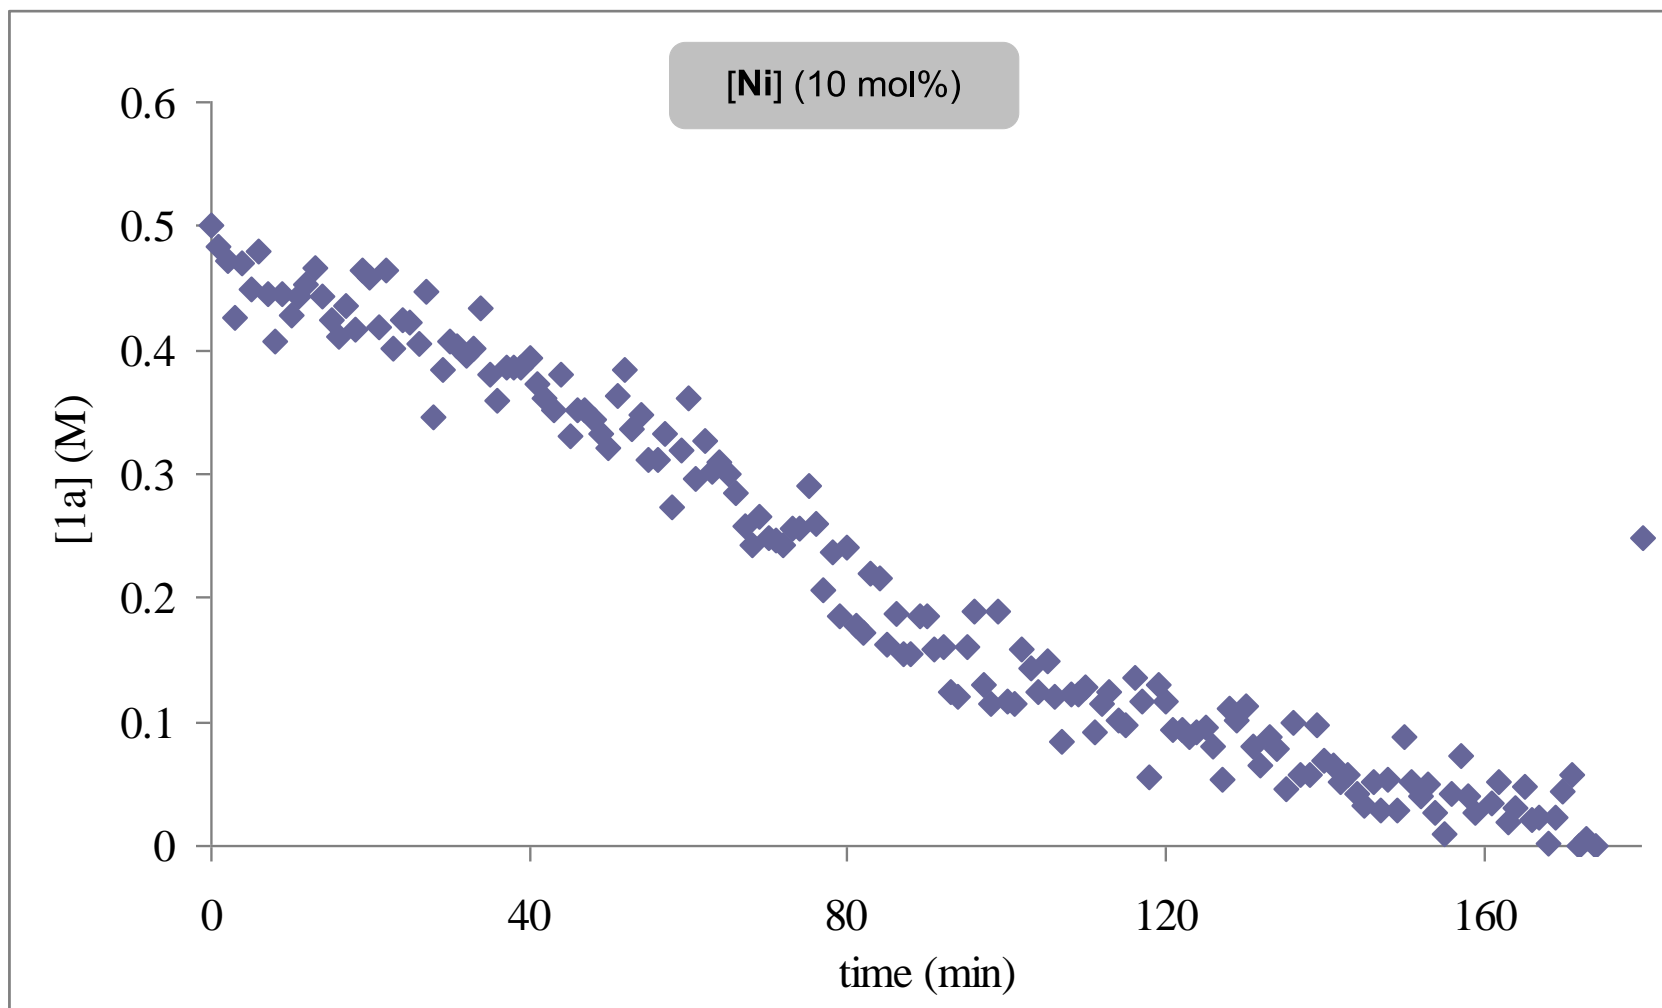

**Reaction condition:** **1a** (1.0 mmol), NiCl<sub>2</sub>(PPh<sub>3</sub>)<sub>2</sub> (0.10 mmol), B<sub>2</sub>pin<sub>2</sub> (0.3 mmol), *n*-PrOH (2.0 mL), N<sub>2</sub>, 120 °C for 4 h..

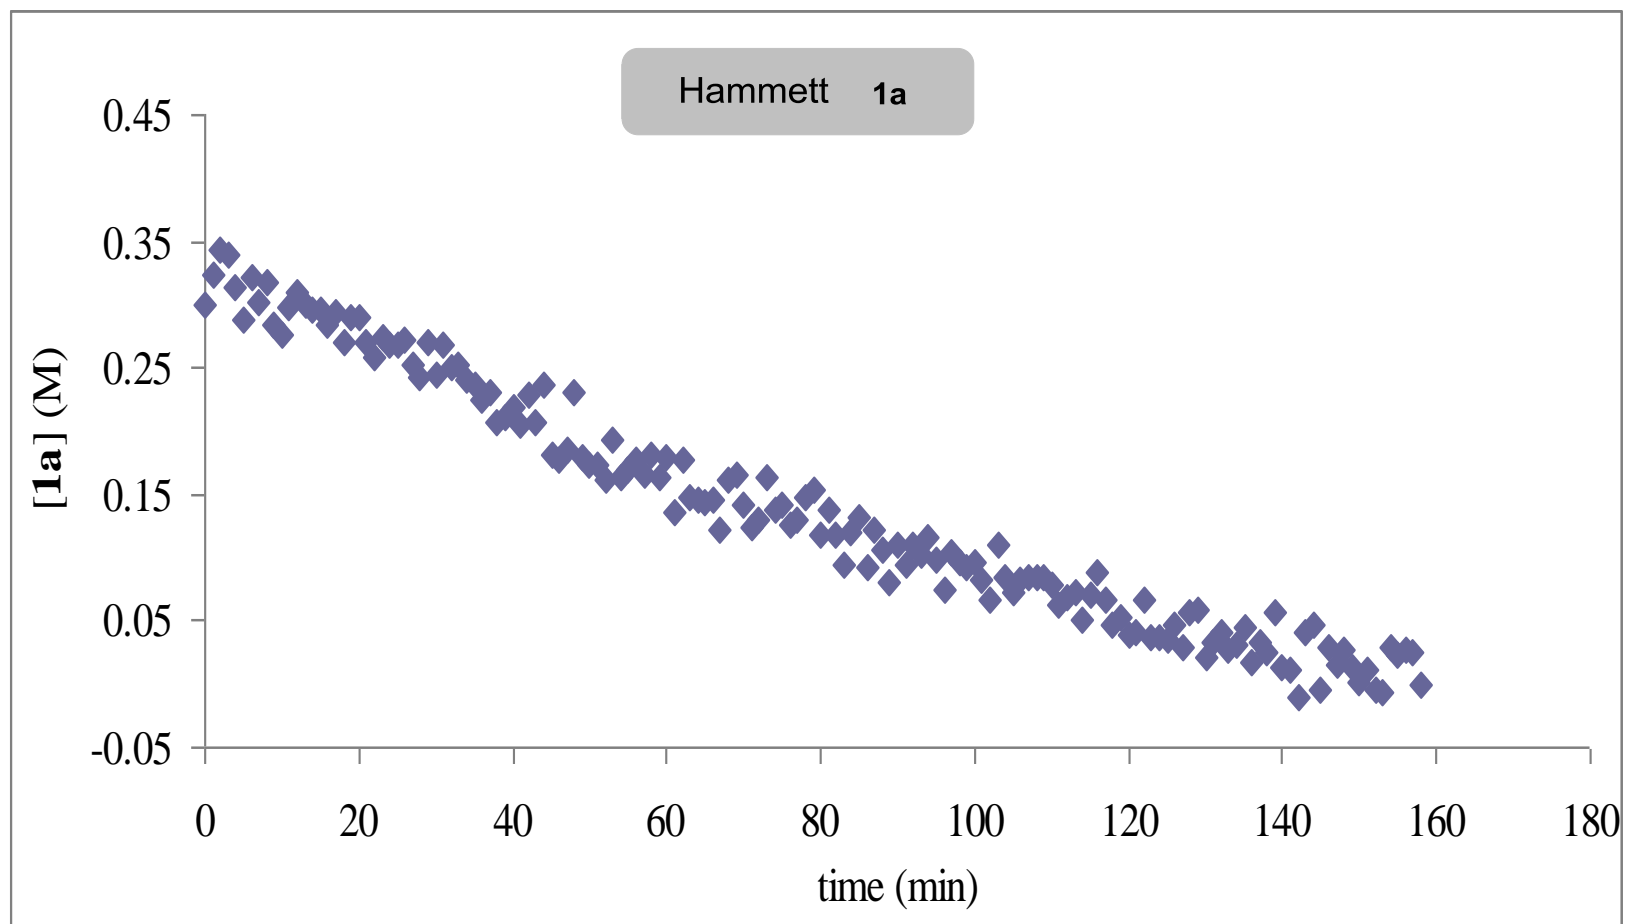

**Reaction condition:** **1a** (0.6 mmol),  $\text{NiCl}_2(\text{PPh}_3)_2$  (0.03 mmol),  $\text{B}_2\text{pin}_2$  (0.3 mmol), *n*-PrOH (2.0 mL),  $\text{N}_2$ , 120 °C for 3 h.

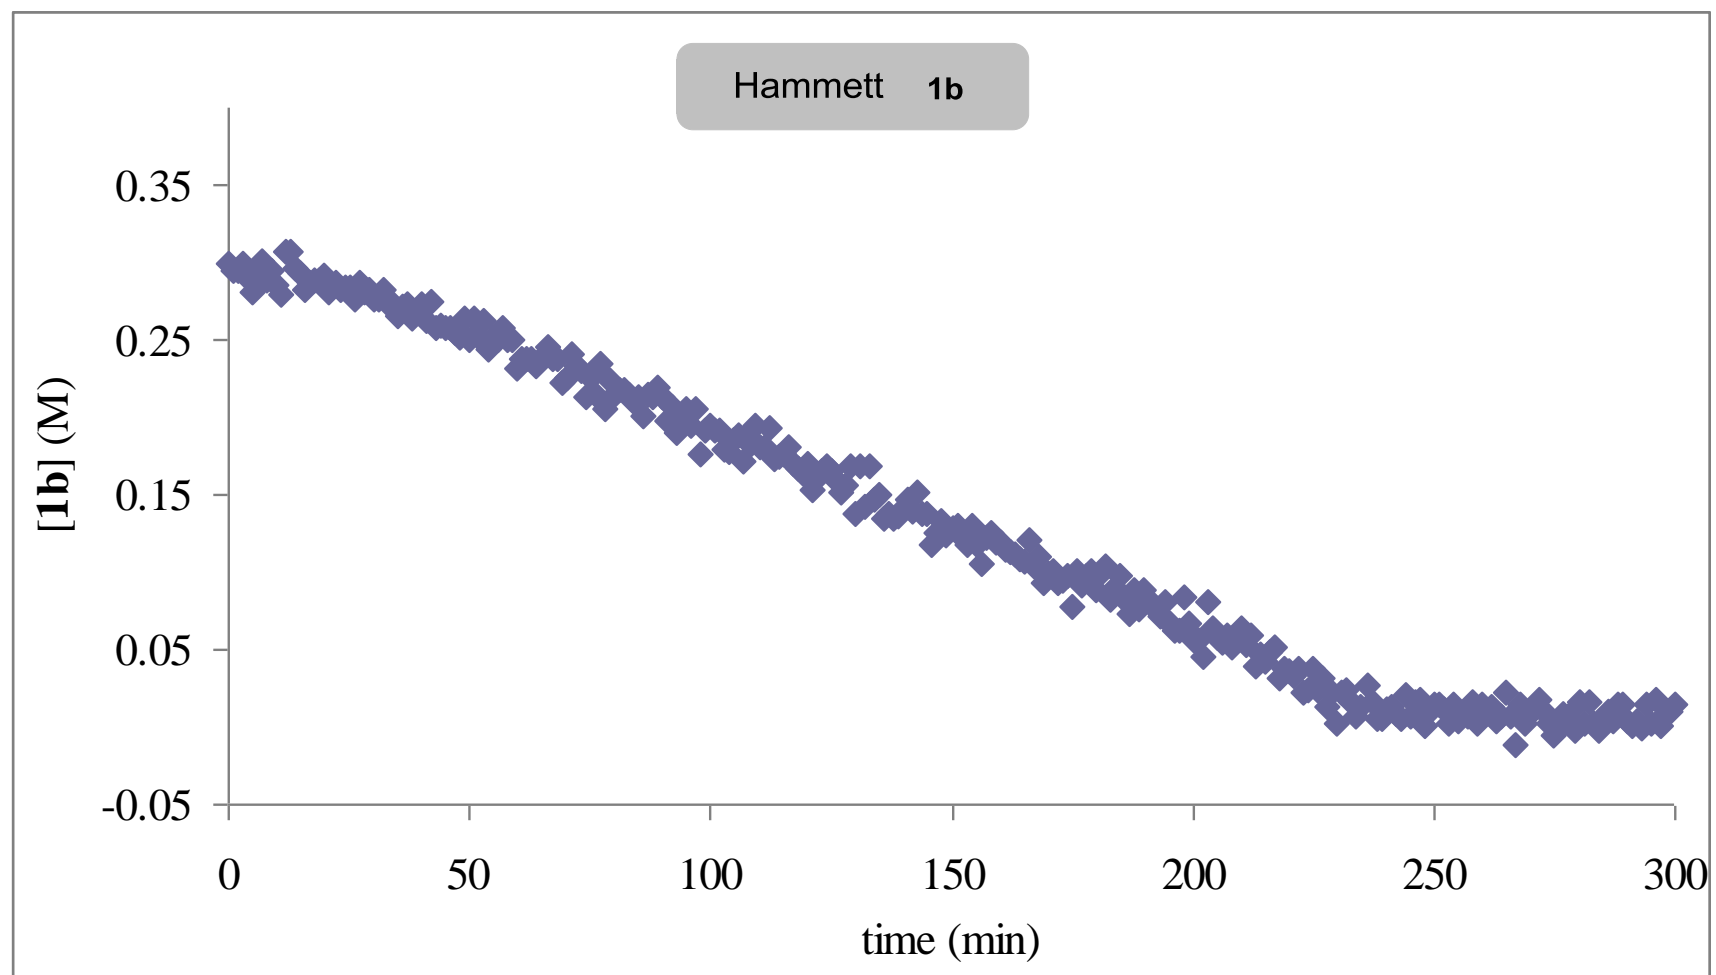

**Reaction condition:** **1b** (0.6 mmol), NiCl<sub>2</sub>(PPh<sub>3</sub>)<sub>2</sub> (0.03 mmol), B<sub>2</sub>pin<sub>2</sub> (0.3 mmol), *n*-PrOH (2.0 mL), N<sub>2</sub>, 120 °C for 7 h.



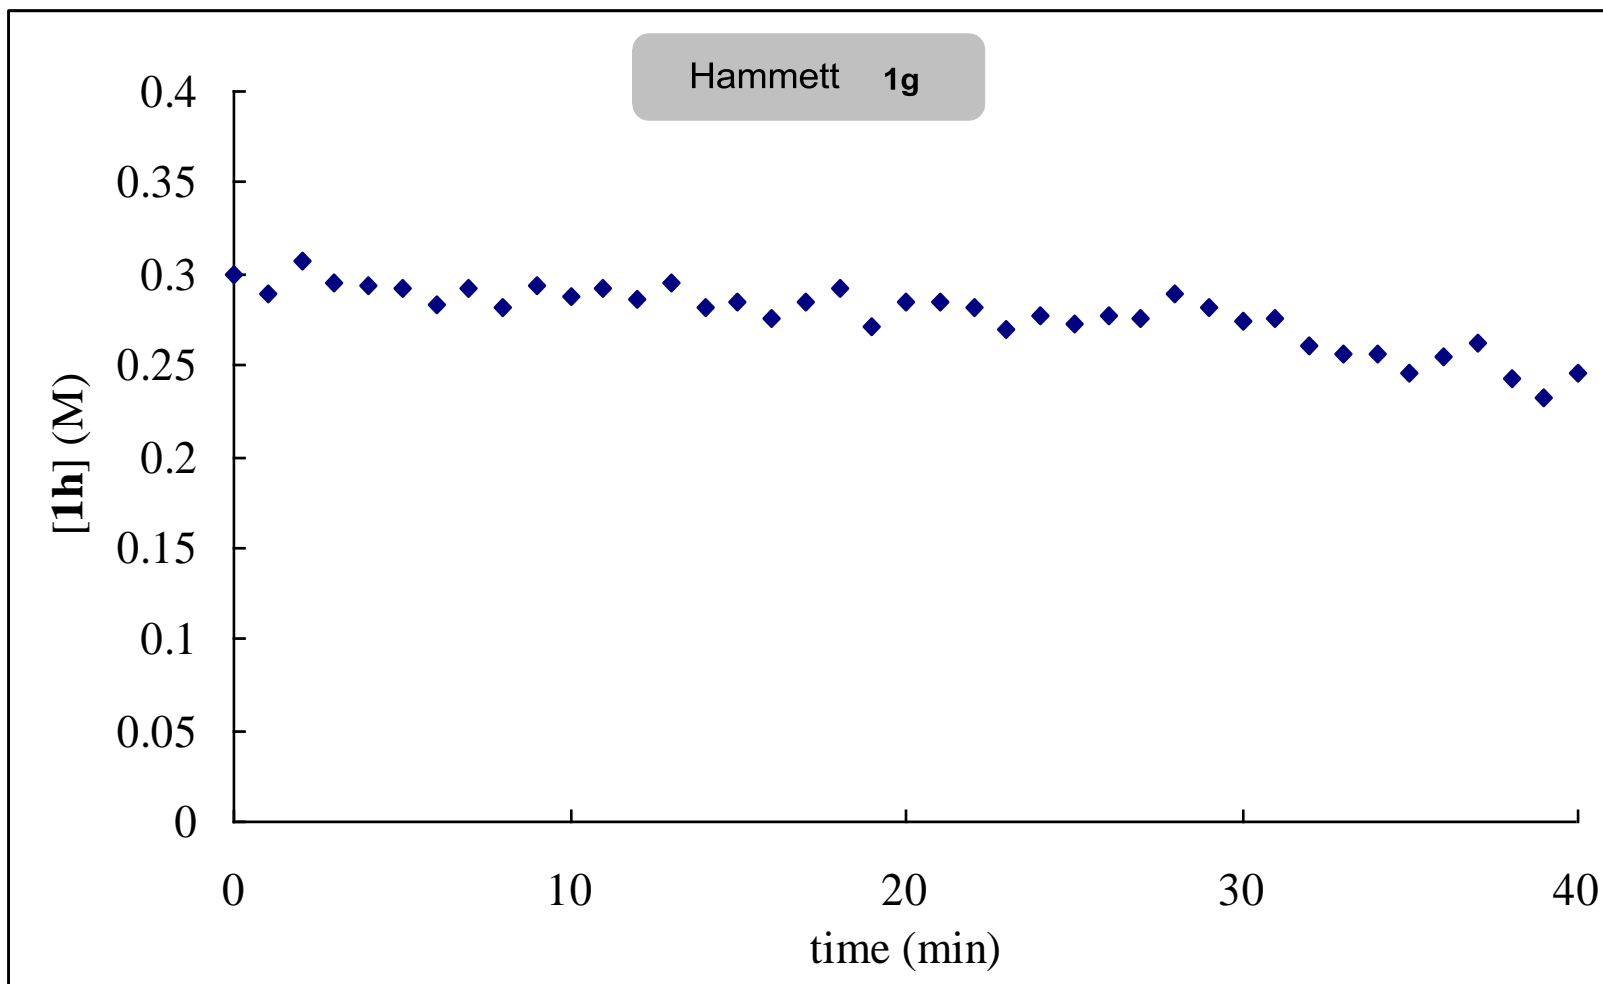

**Reaction condition:** **1h** (0.6 mmol), NiCl<sub>2</sub>(PPh<sub>3</sub>)<sub>2</sub> (0.03 mmol), B<sub>2</sub>pin<sub>2</sub> (0.3 mmol), *n*-PrOH (2.0 mL), N<sub>2</sub>, 120 °C for 1 h.

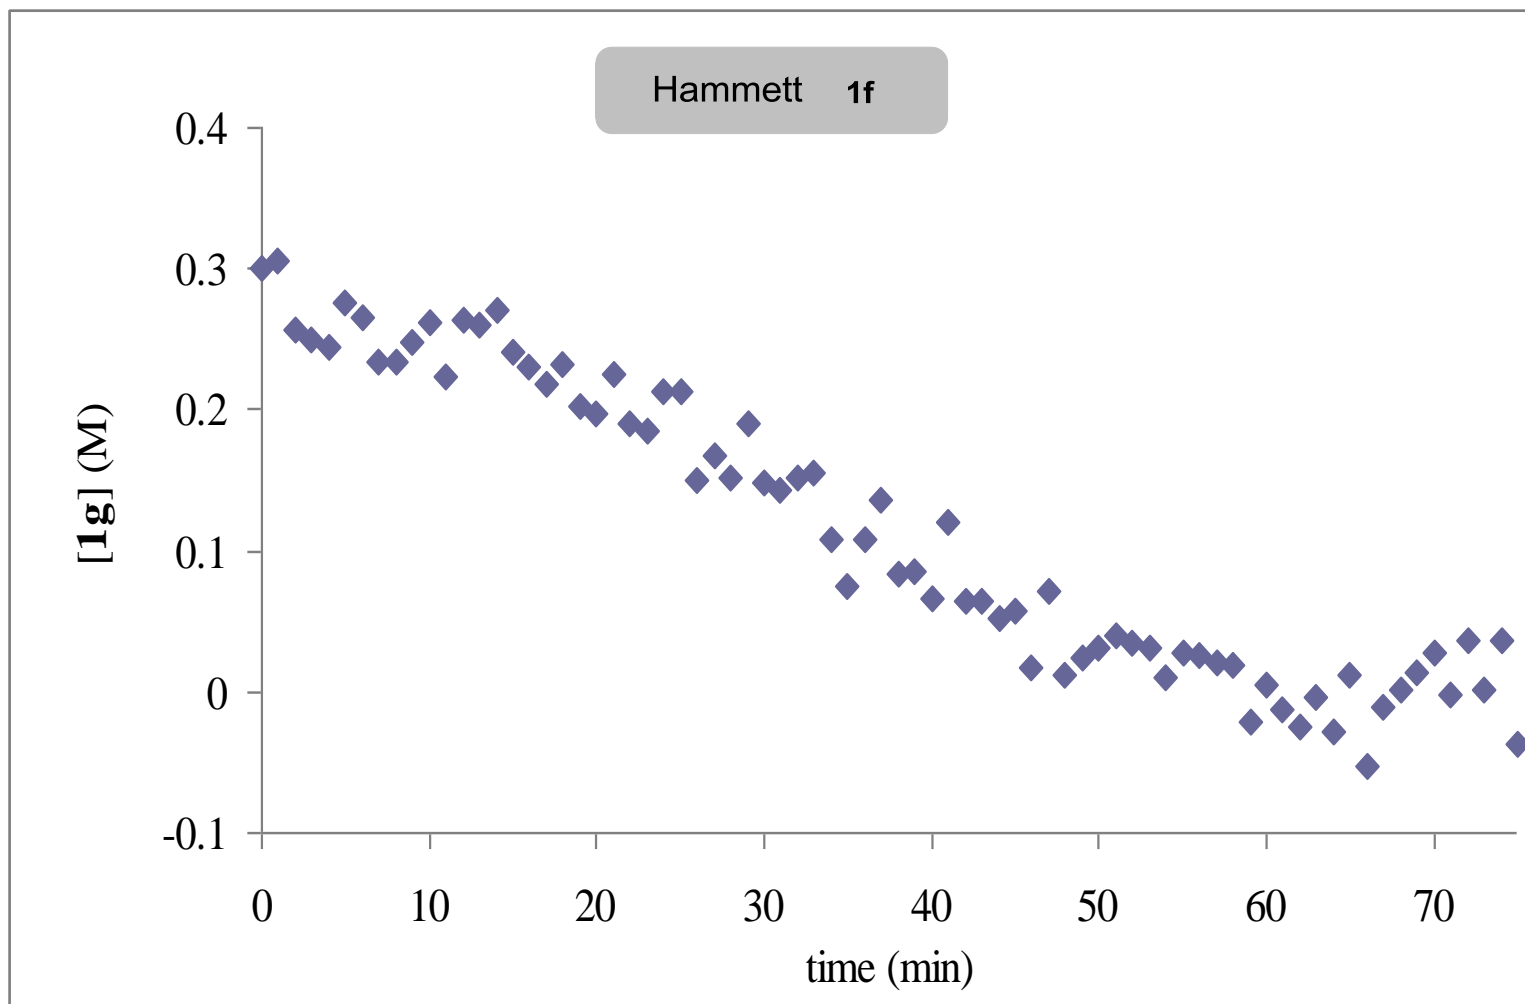

**Reaction condition:** **1g** (0.6 mmol), NiCl<sub>2</sub>(PPh<sub>3</sub>)<sub>2</sub> (0.03 mmol), B<sub>2</sub>pin<sub>2</sub> (0.3 mmol), *n*-PrOH (2.0 mL), N<sub>2</sub>, 120 °C for 2 h.

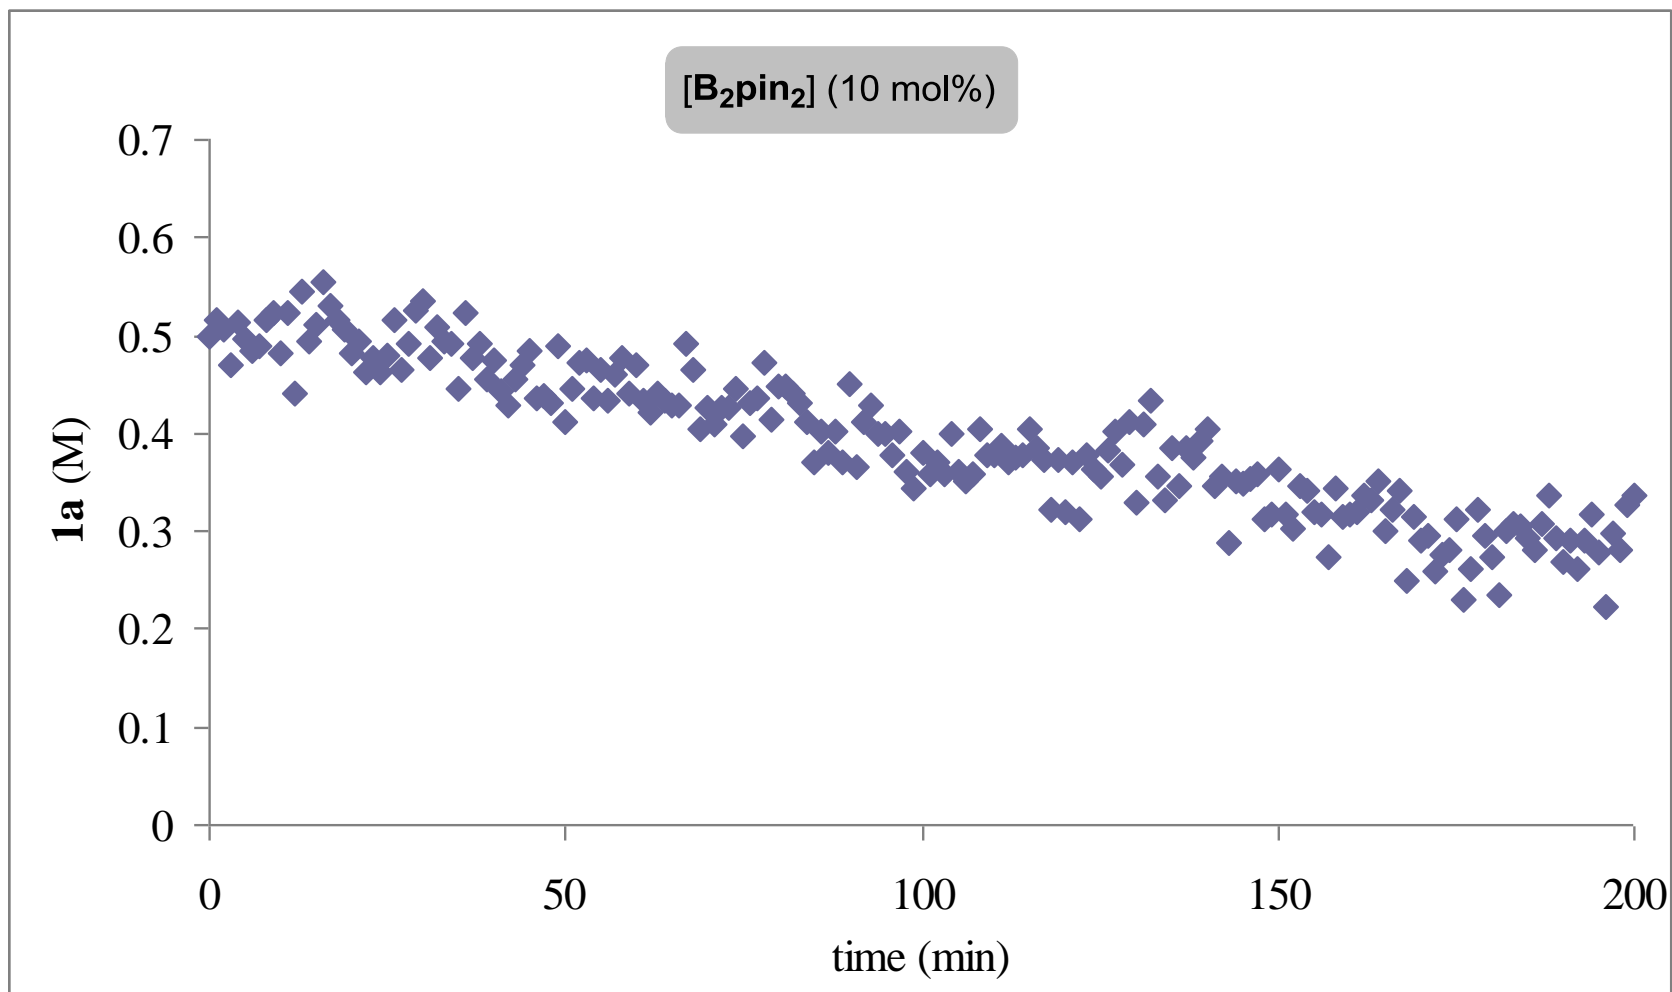

**Reaction condition:** **1a** (1.0 mmol), NiCl<sub>2</sub>(PPh<sub>3</sub>)<sub>2</sub> (0.03 mmol), B<sub>2</sub>pin<sub>2</sub> (0.1 mmol), *n*-PrOH (2.0 mL), N<sub>2</sub>, 120 °C for 3 h.

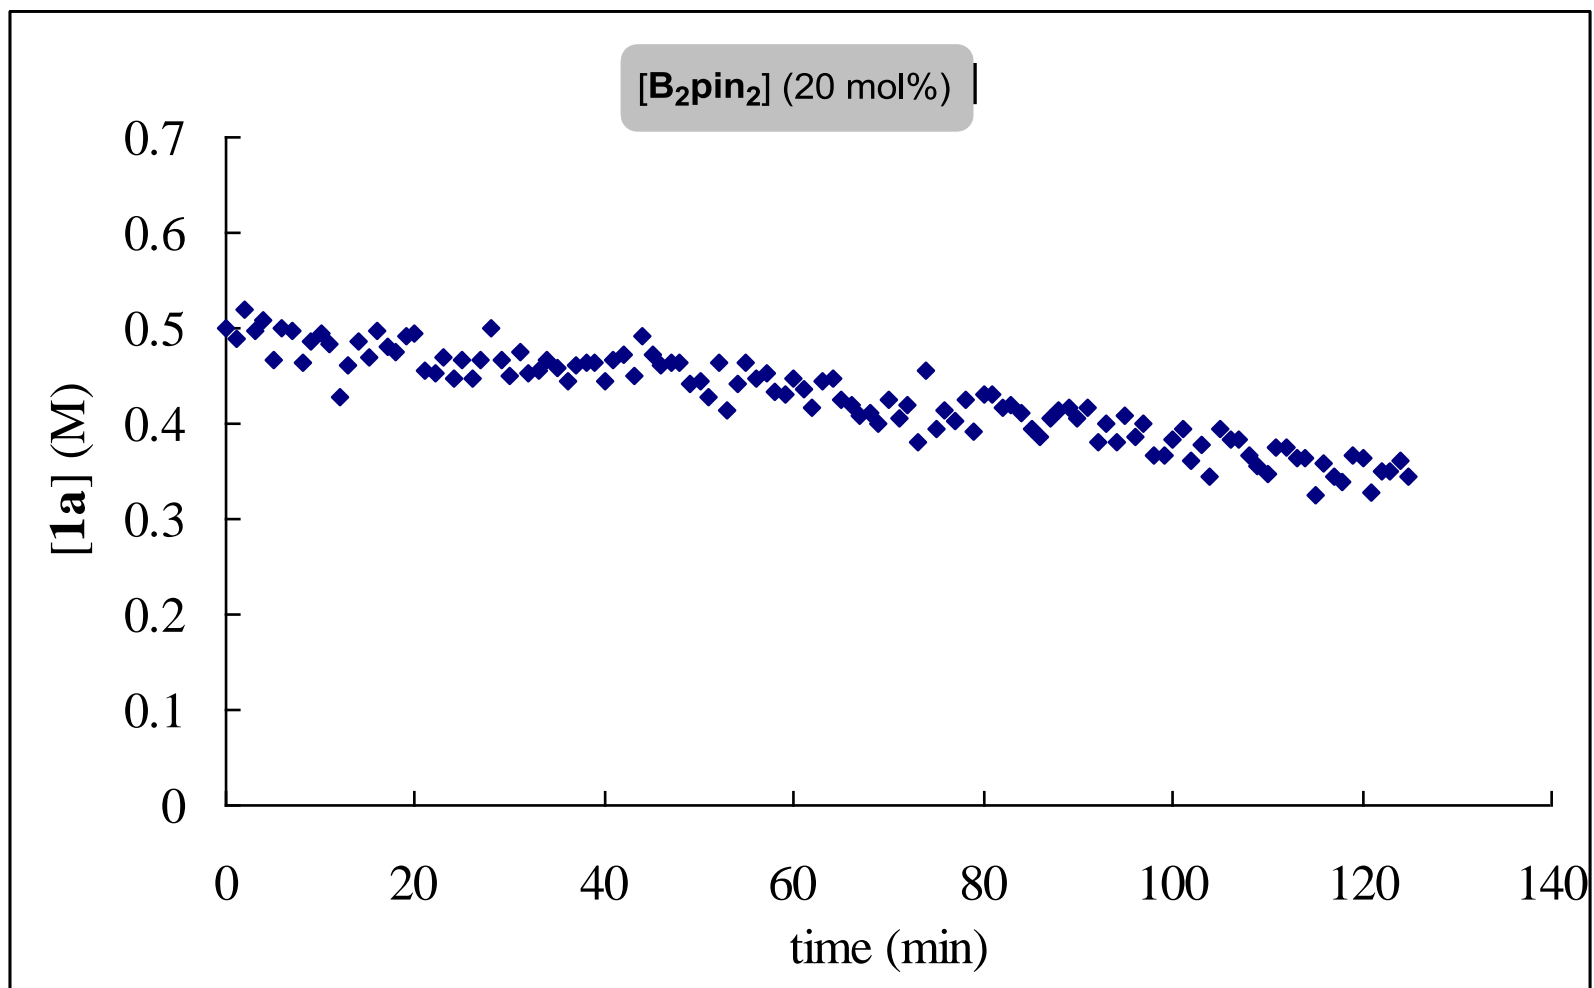

**Reaction condition:** **1a** (1.0 mmol), NiCl<sub>2</sub>(PPh<sub>3</sub>)<sub>2</sub> (0.03 mmol), B<sub>2</sub>pin<sub>2</sub> (0.2 mmol), *n*-PrOH (2.0 mL), N<sub>2</sub>, 120 °C for 3 h.

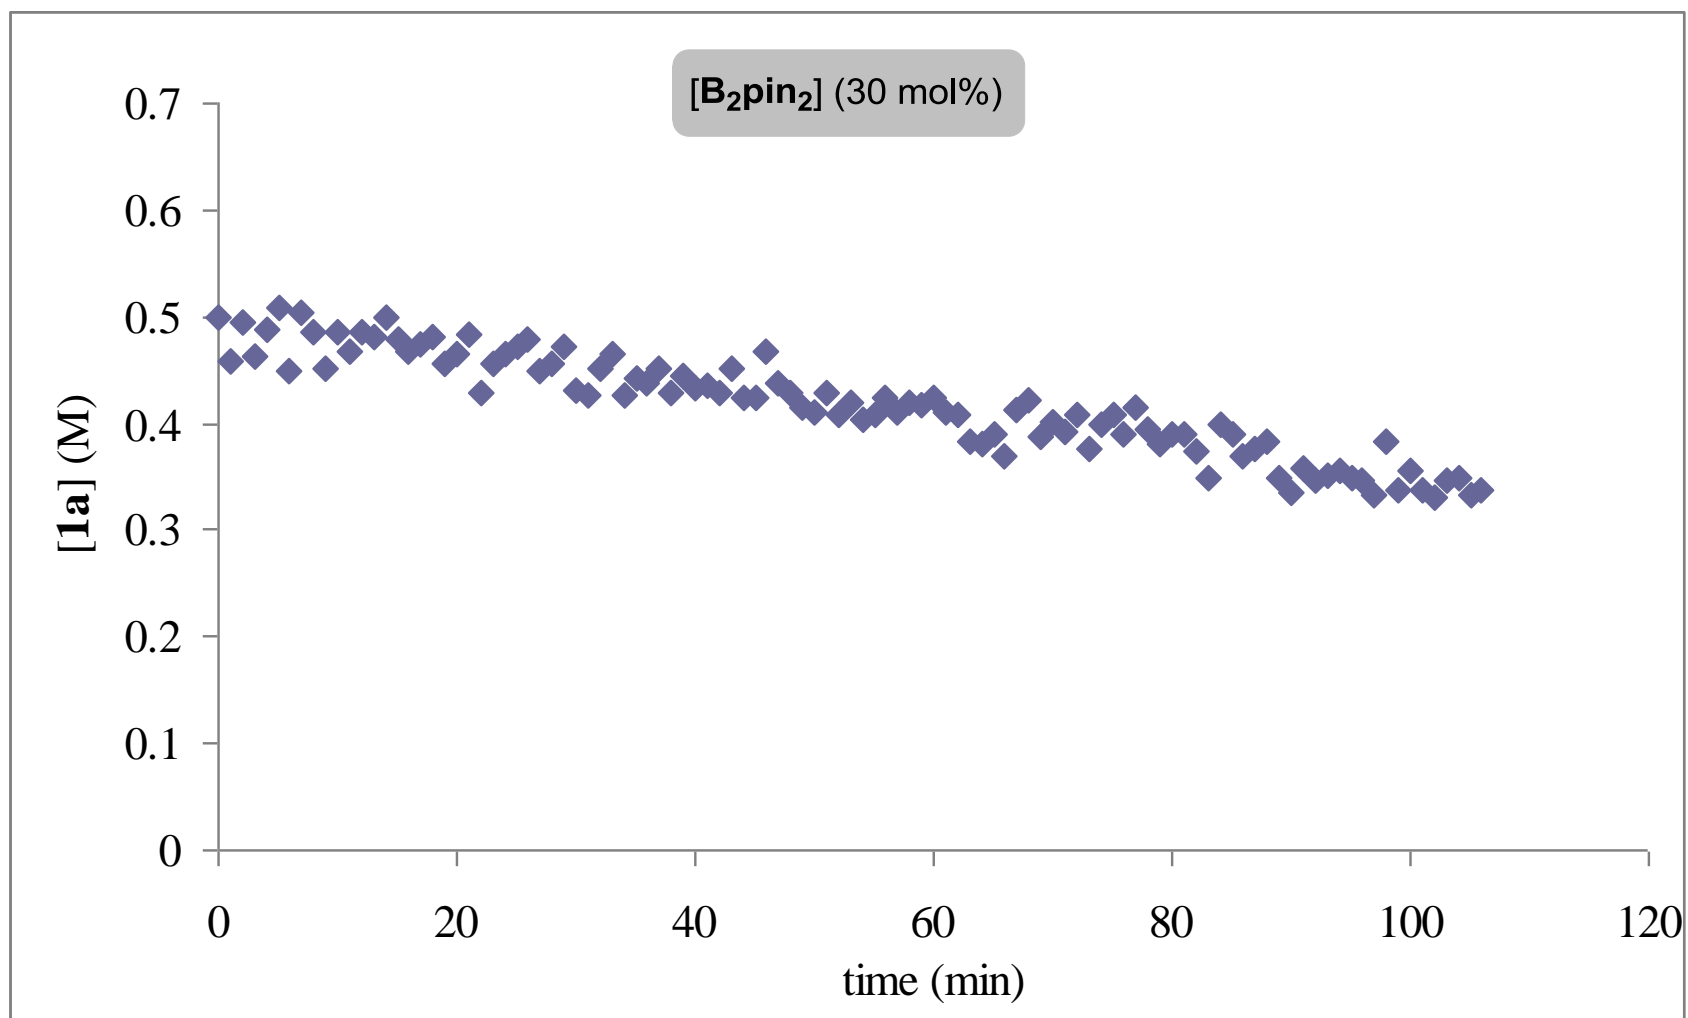

**Reaction condition:** **1a** (1.0 mmol), NiCl<sub>2</sub>(PPh<sub>3</sub>)<sub>2</sub> (0.03 mmol), B<sub>2</sub>pin<sub>2</sub> (0.3 mmol), *n*-PrOH (2.0 mL), N<sub>2</sub>, 120 °C for 2 h.

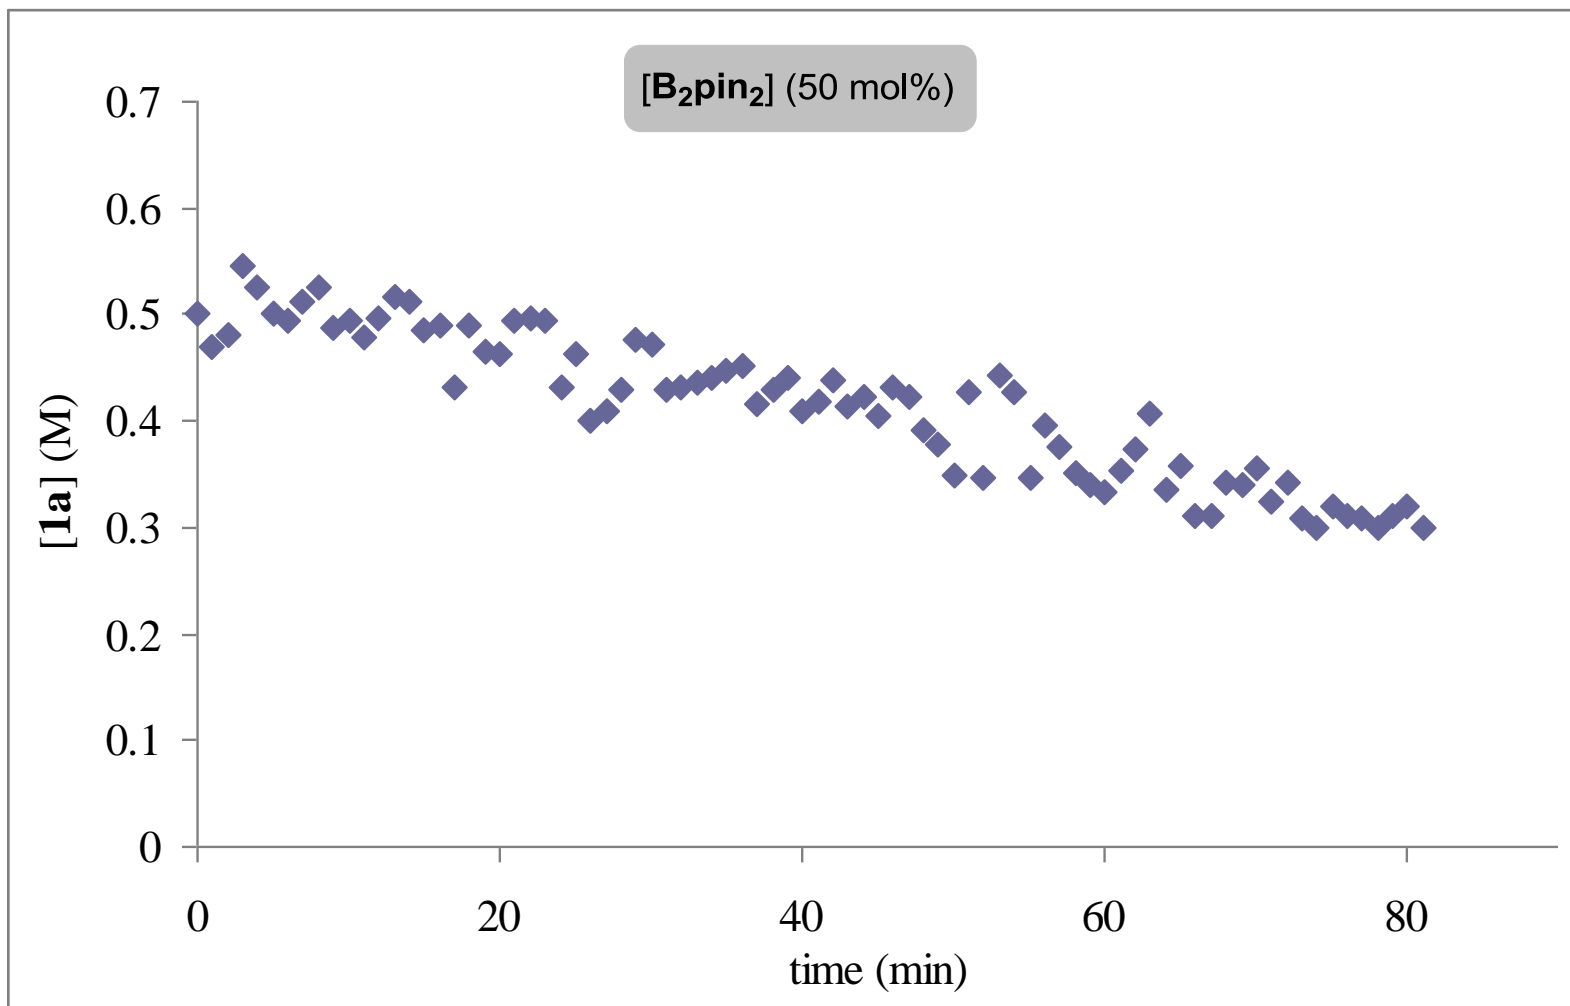

**Reaction condition:** **1a** (1.0 mmol), NiCl<sub>2</sub>(PPh<sub>3</sub>)<sub>2</sub> (0.03 mmol), B<sub>2</sub>pin<sub>2</sub> (0.5 mmol), *n*-PrOH (2.0 mL), N<sub>2</sub>, 120 °C for 2 h.

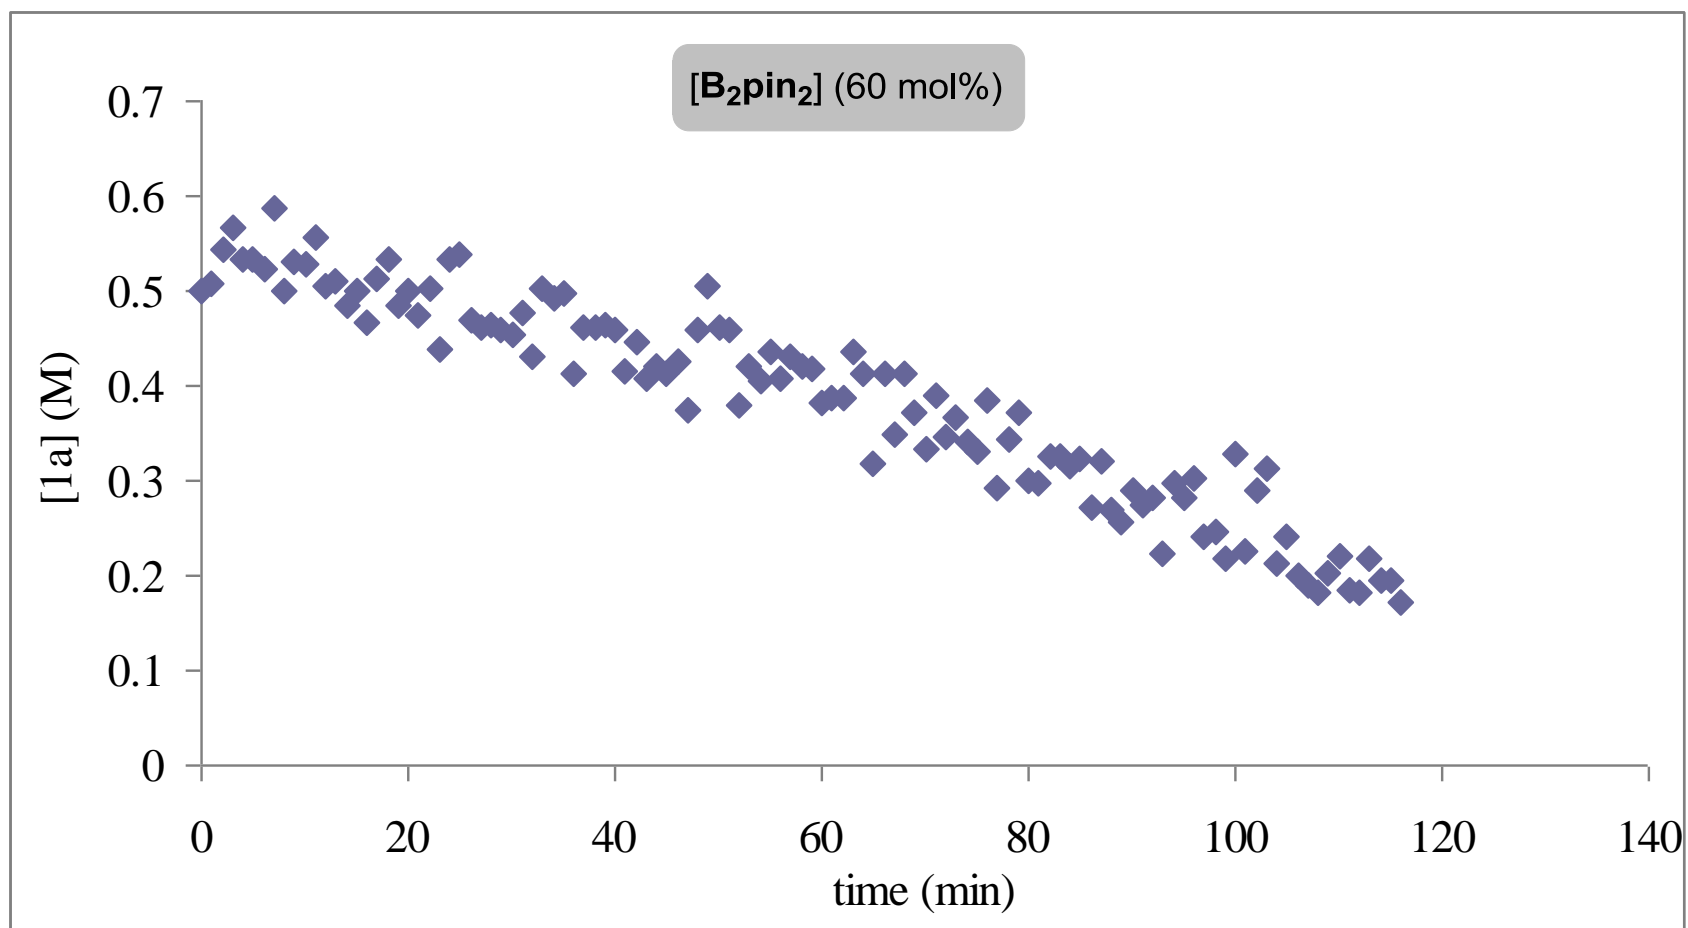

**Reaction condition:** **1a** (1.0 mmol), NiCl<sub>2</sub>(PPh<sub>3</sub>)<sub>2</sub> (0.03 mmol), B<sub>2</sub>pin<sub>2</sub> (0.6 mmol), *n*-PrOH (2.0 mL), N<sub>2</sub>, 120 °C for 2 h.

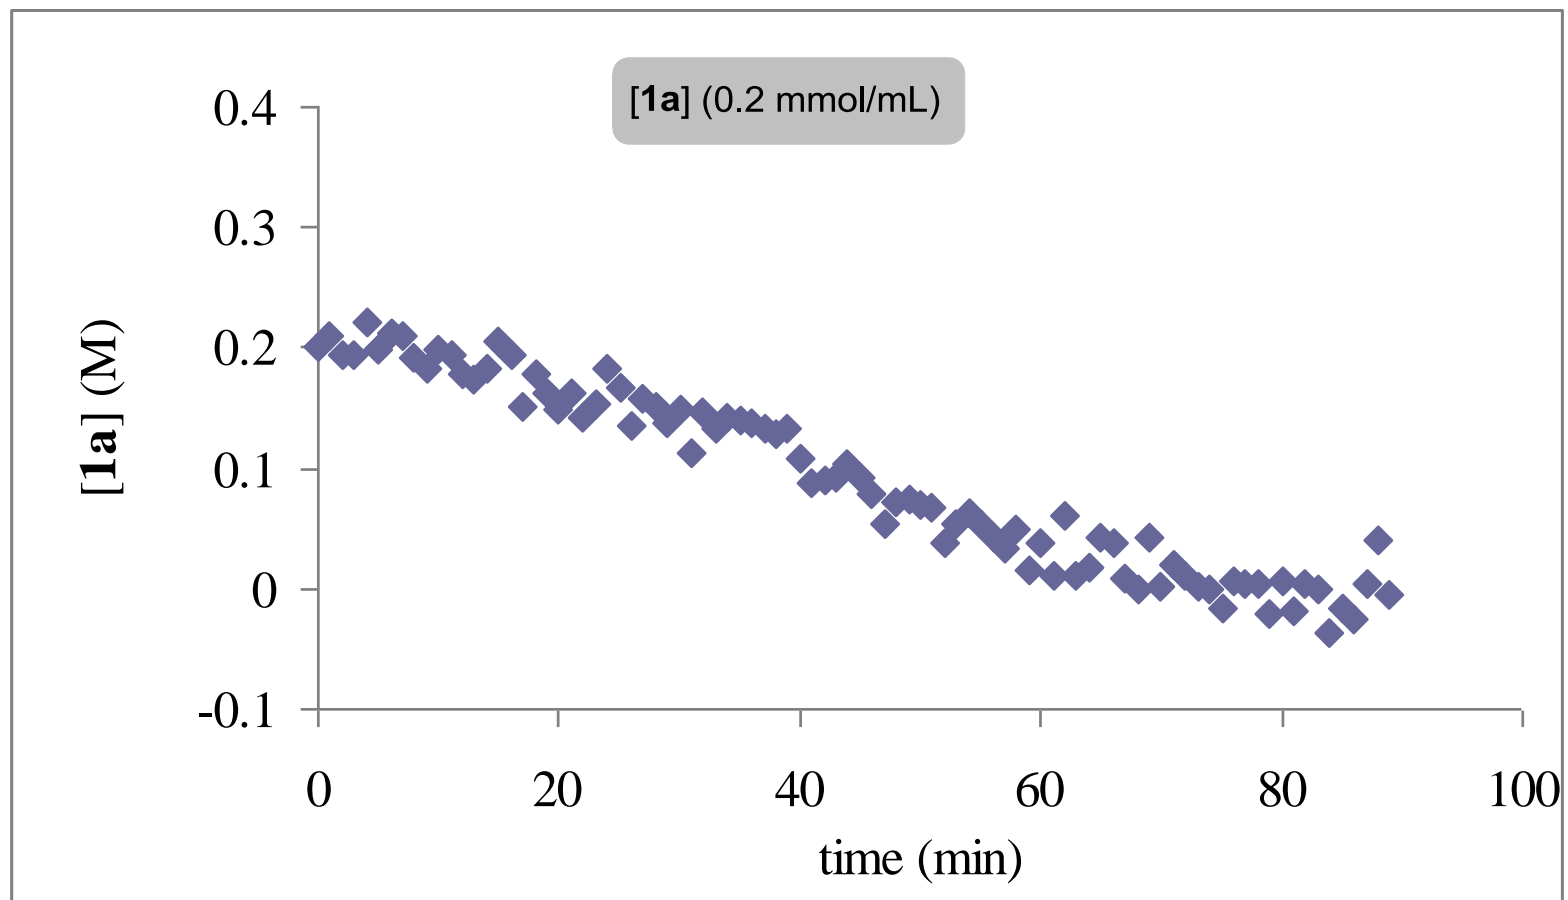

**Reaction condition:** **1a** (0.20 mmol), NiCl<sub>2</sub>(PPh<sub>3</sub>)<sub>2</sub> (0.03 mmol), B<sub>2</sub>pin<sub>2</sub> (0.6 mmol), *n*-PrOH (2.0 mL), N<sub>2</sub>, 120 °C for 2 h.



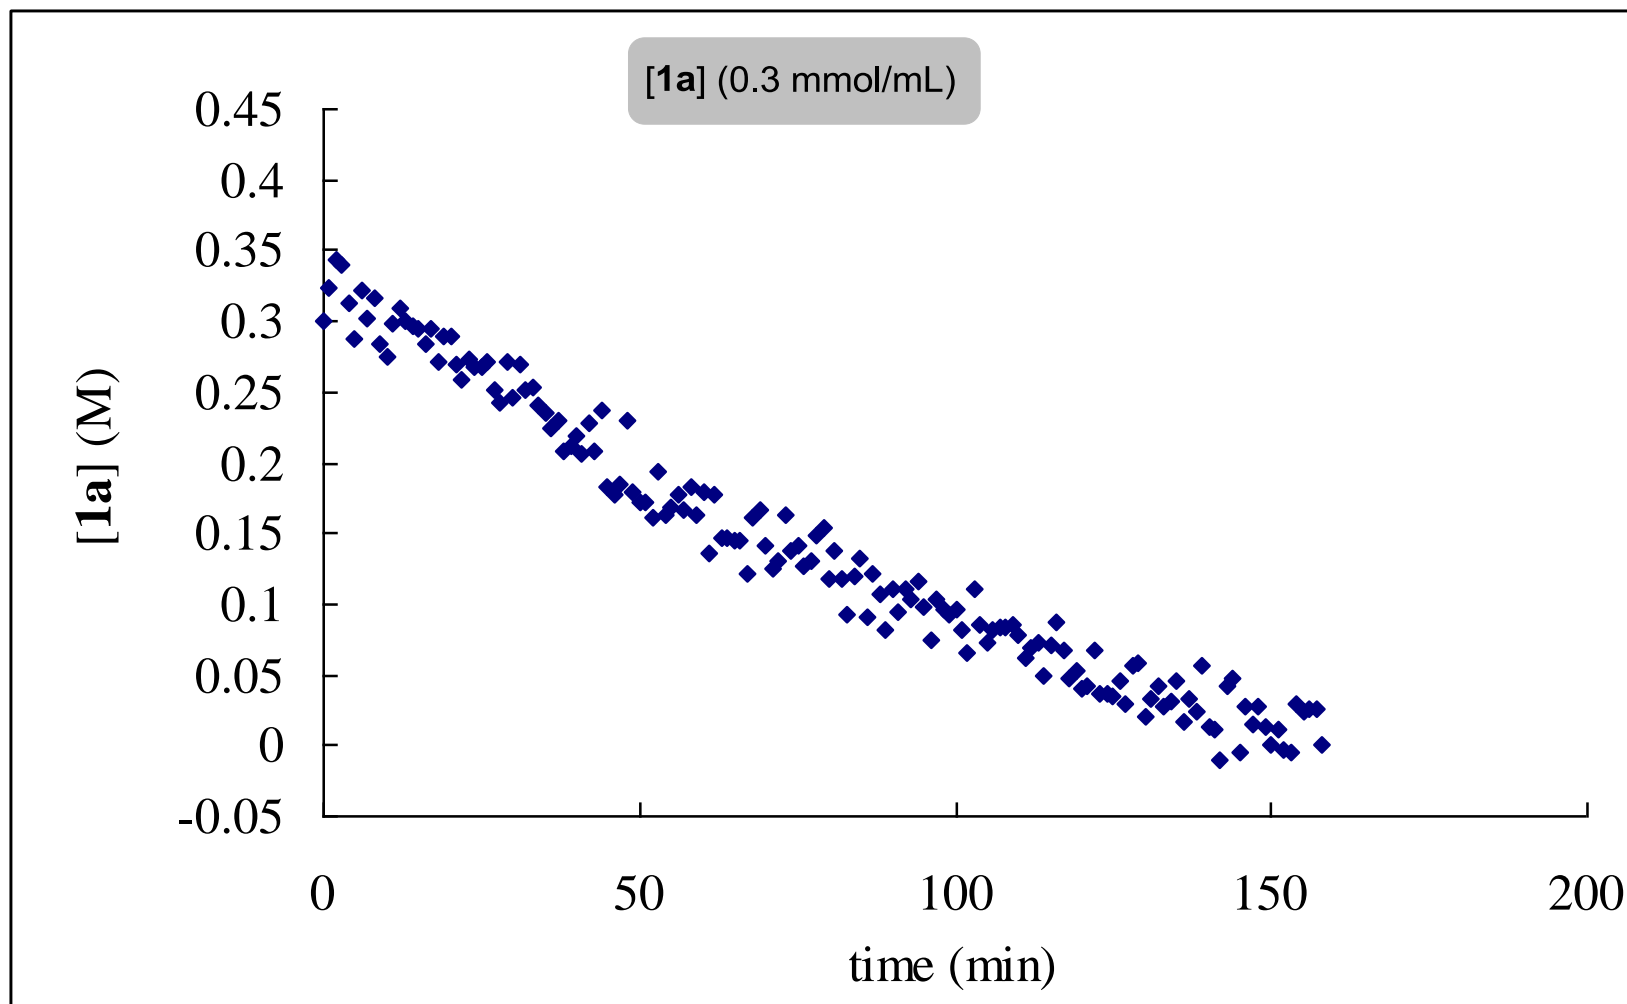

**Reaction condition:** **1a** (0.6 mmol), NiCl<sub>2</sub>(PPh<sub>3</sub>)<sub>2</sub> (0.03 mmol), B<sub>2</sub>pin<sub>2</sub> (0.6 mmol), *n*-PrOH (2.0 mL), N<sub>2</sub>, 120 °C for 3 h.

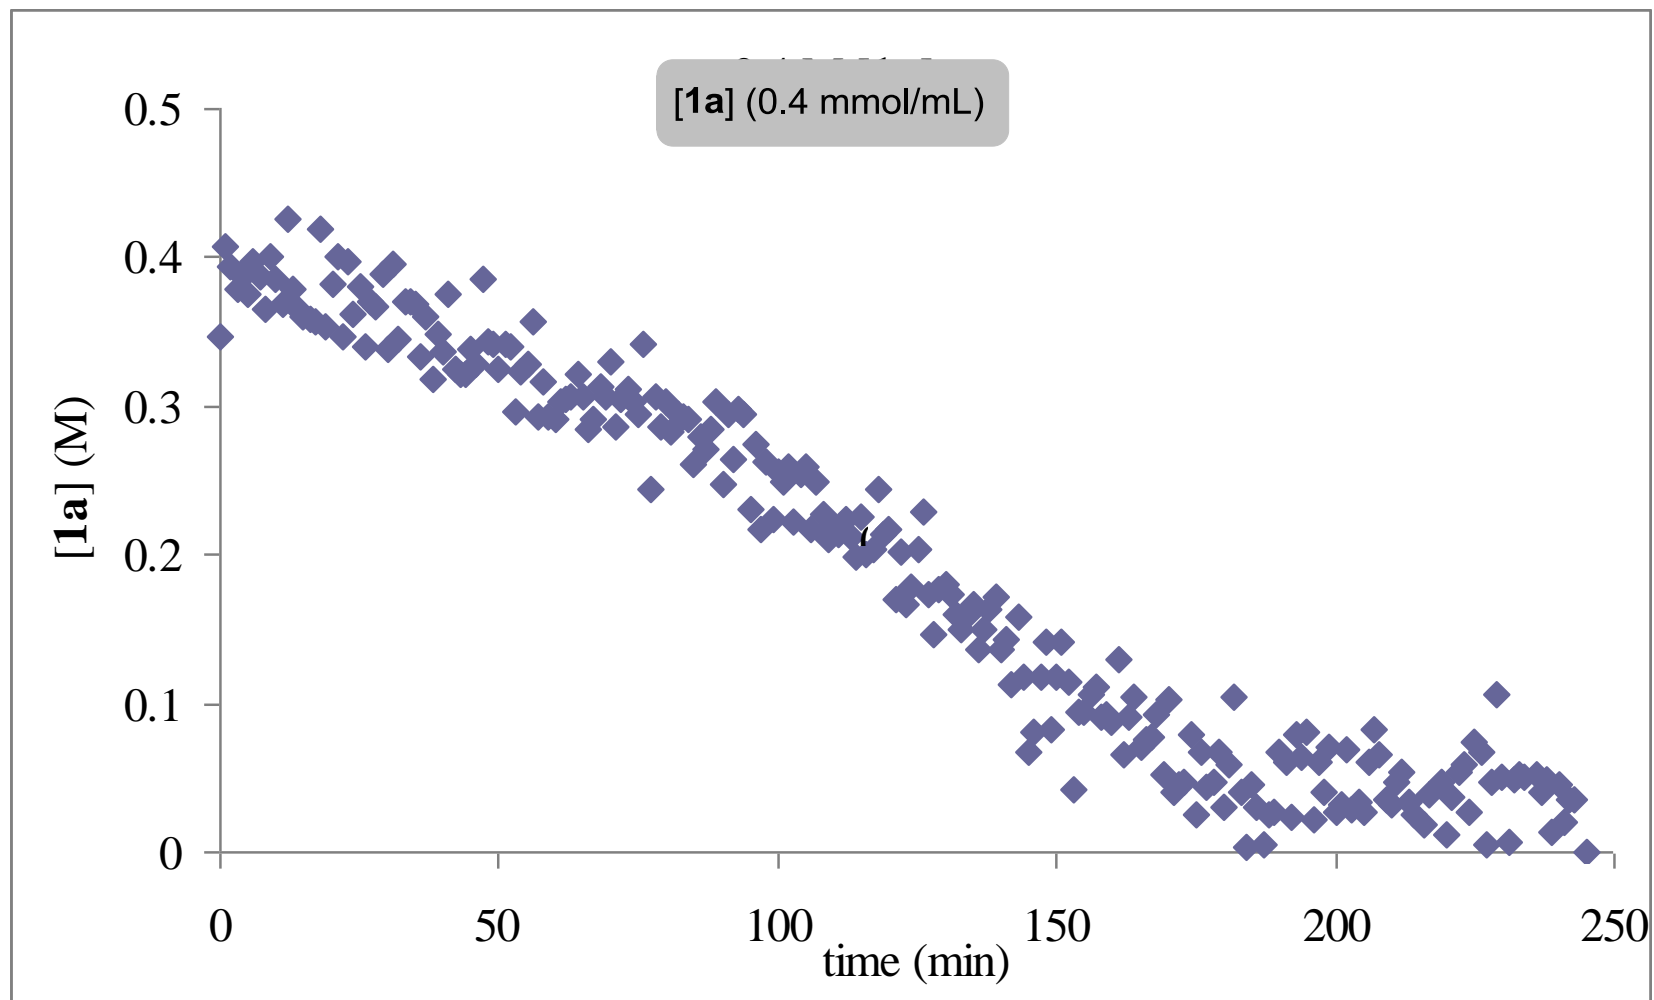

**Reaction condition:** **1a** (0.8 mmol), NiCl<sub>2</sub>(PPh<sub>3</sub>)<sub>2</sub> (0.03 mmol), B<sub>2</sub>pin<sub>2</sub> (0.6 mmol), *n*-PrOH (2.0 mL), N<sub>2</sub>, 120 °C for 4 h.

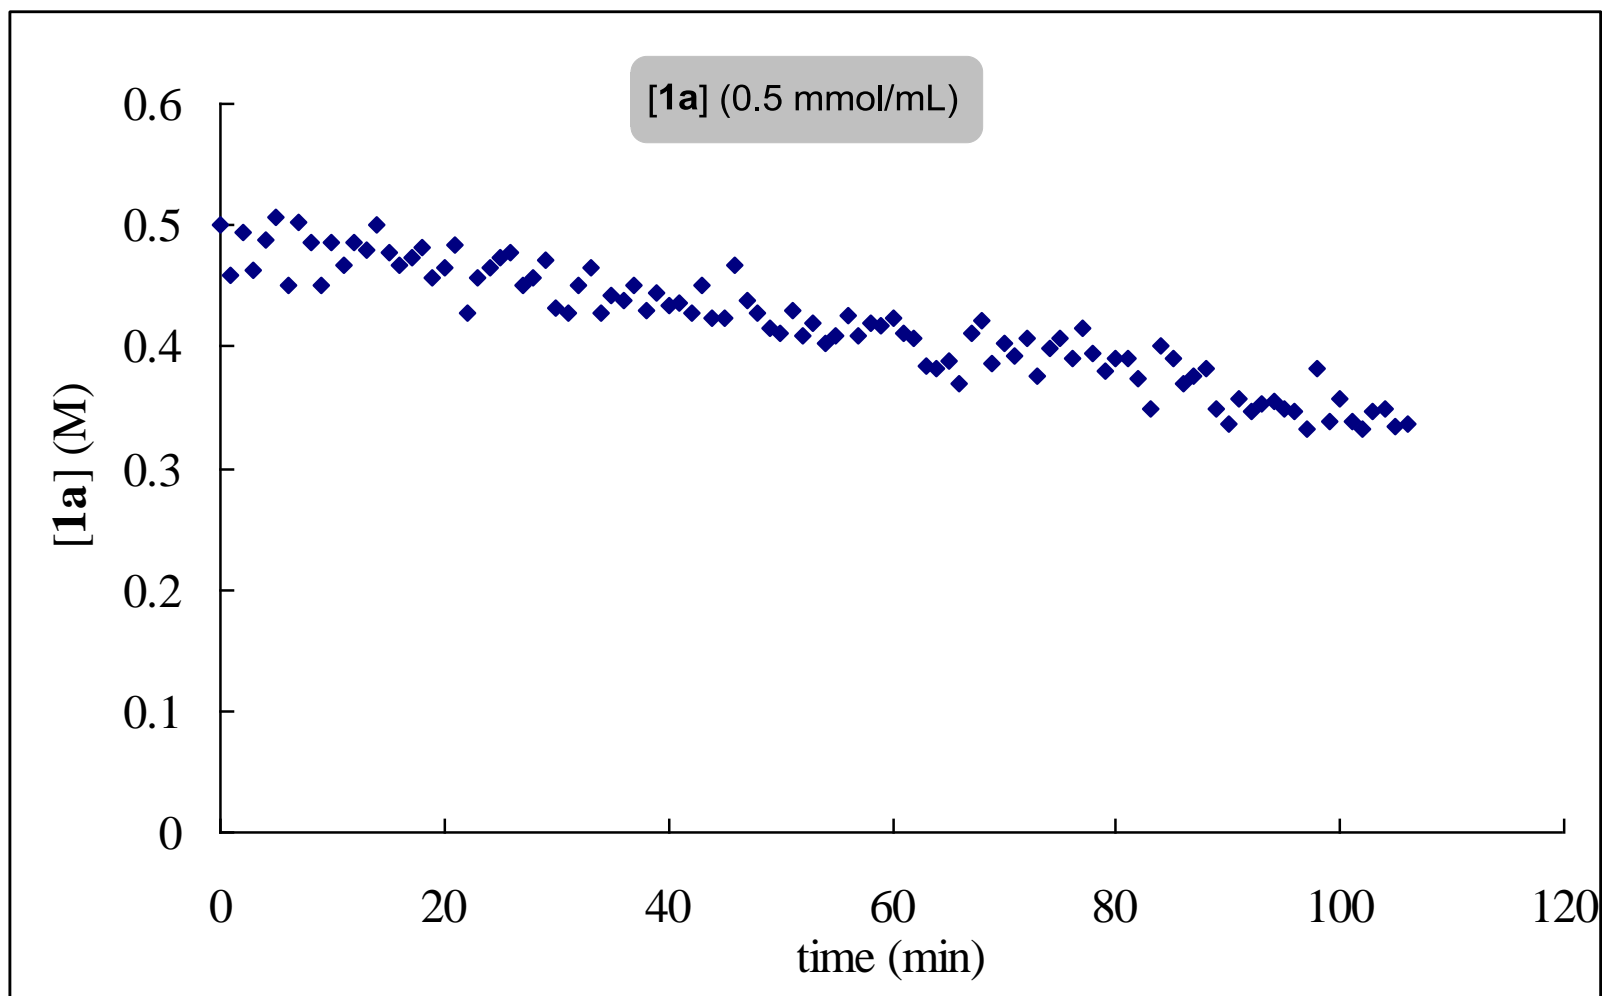

**Reaction condition:** **1a** (1.0 mmol), NiCl<sub>2</sub>(PPh<sub>3</sub>)<sub>2</sub> (0.03 mmol), B<sub>2</sub>pin<sub>2</sub> (0.6 mmol), *n*-PrOH (2.0 mL), N<sub>2</sub>, 120 °C for 2 h.
